# Supplementary material for: An Oxford Nanopore-based Characterisation of Sputum Microbiota Dysbiosis in Patients with Tuberculosis: from baseline to 7 days after Antibiotic Treatment
Source: bioRxiv or medRxiv preprint supplement (doi:10.1101/2021.06.24.21259332), 2021-06-29
Supplement: Supplementary file [file media-3.pdf]

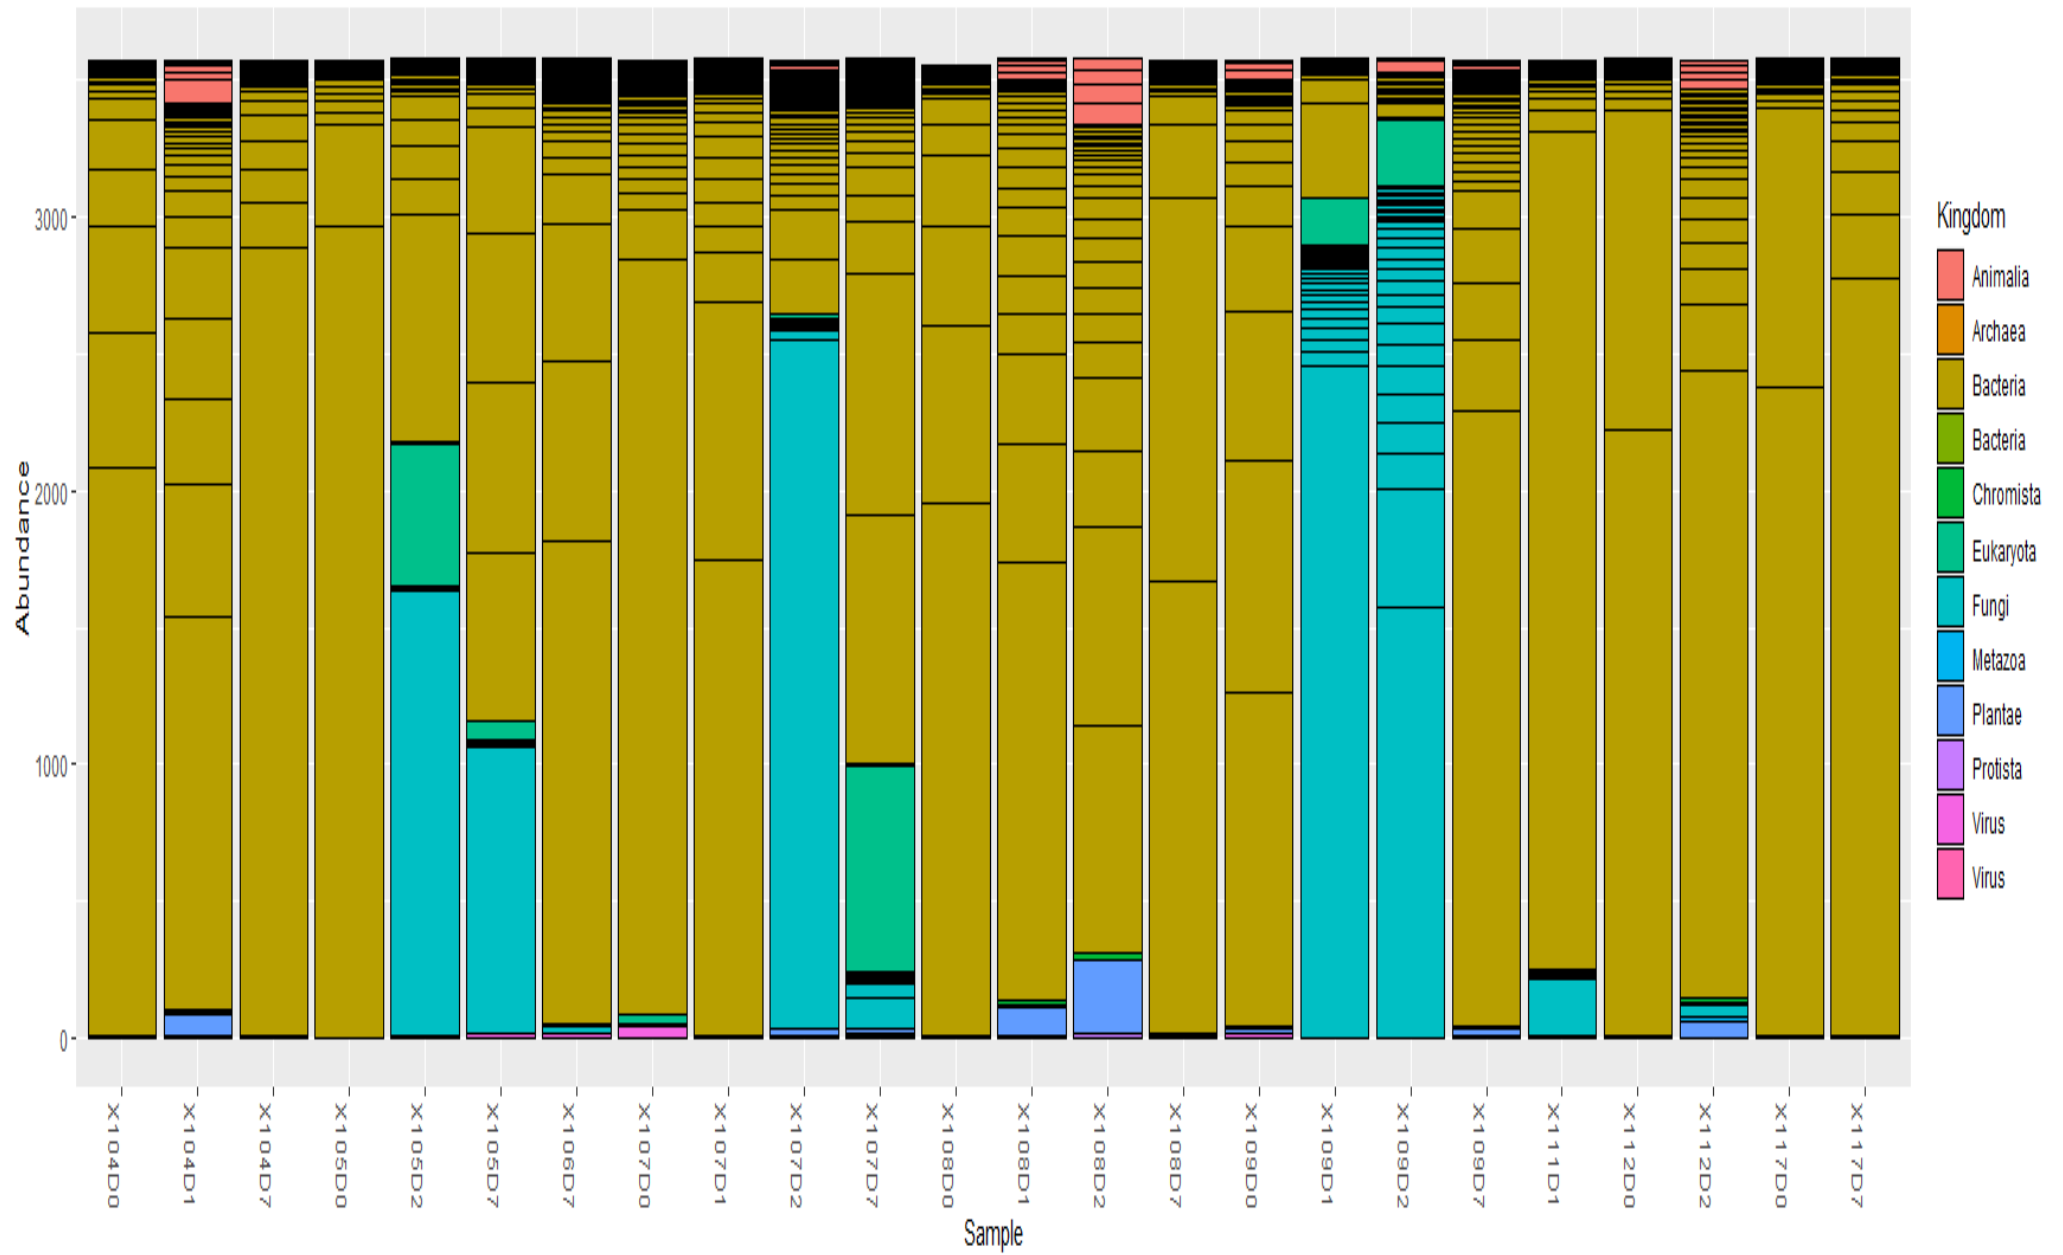

**Figure i. Abundance of microbial kingdom in all sputum samples.** Bacteria were the most dominant Kingdom/Division in the sputum samples' microbiota.

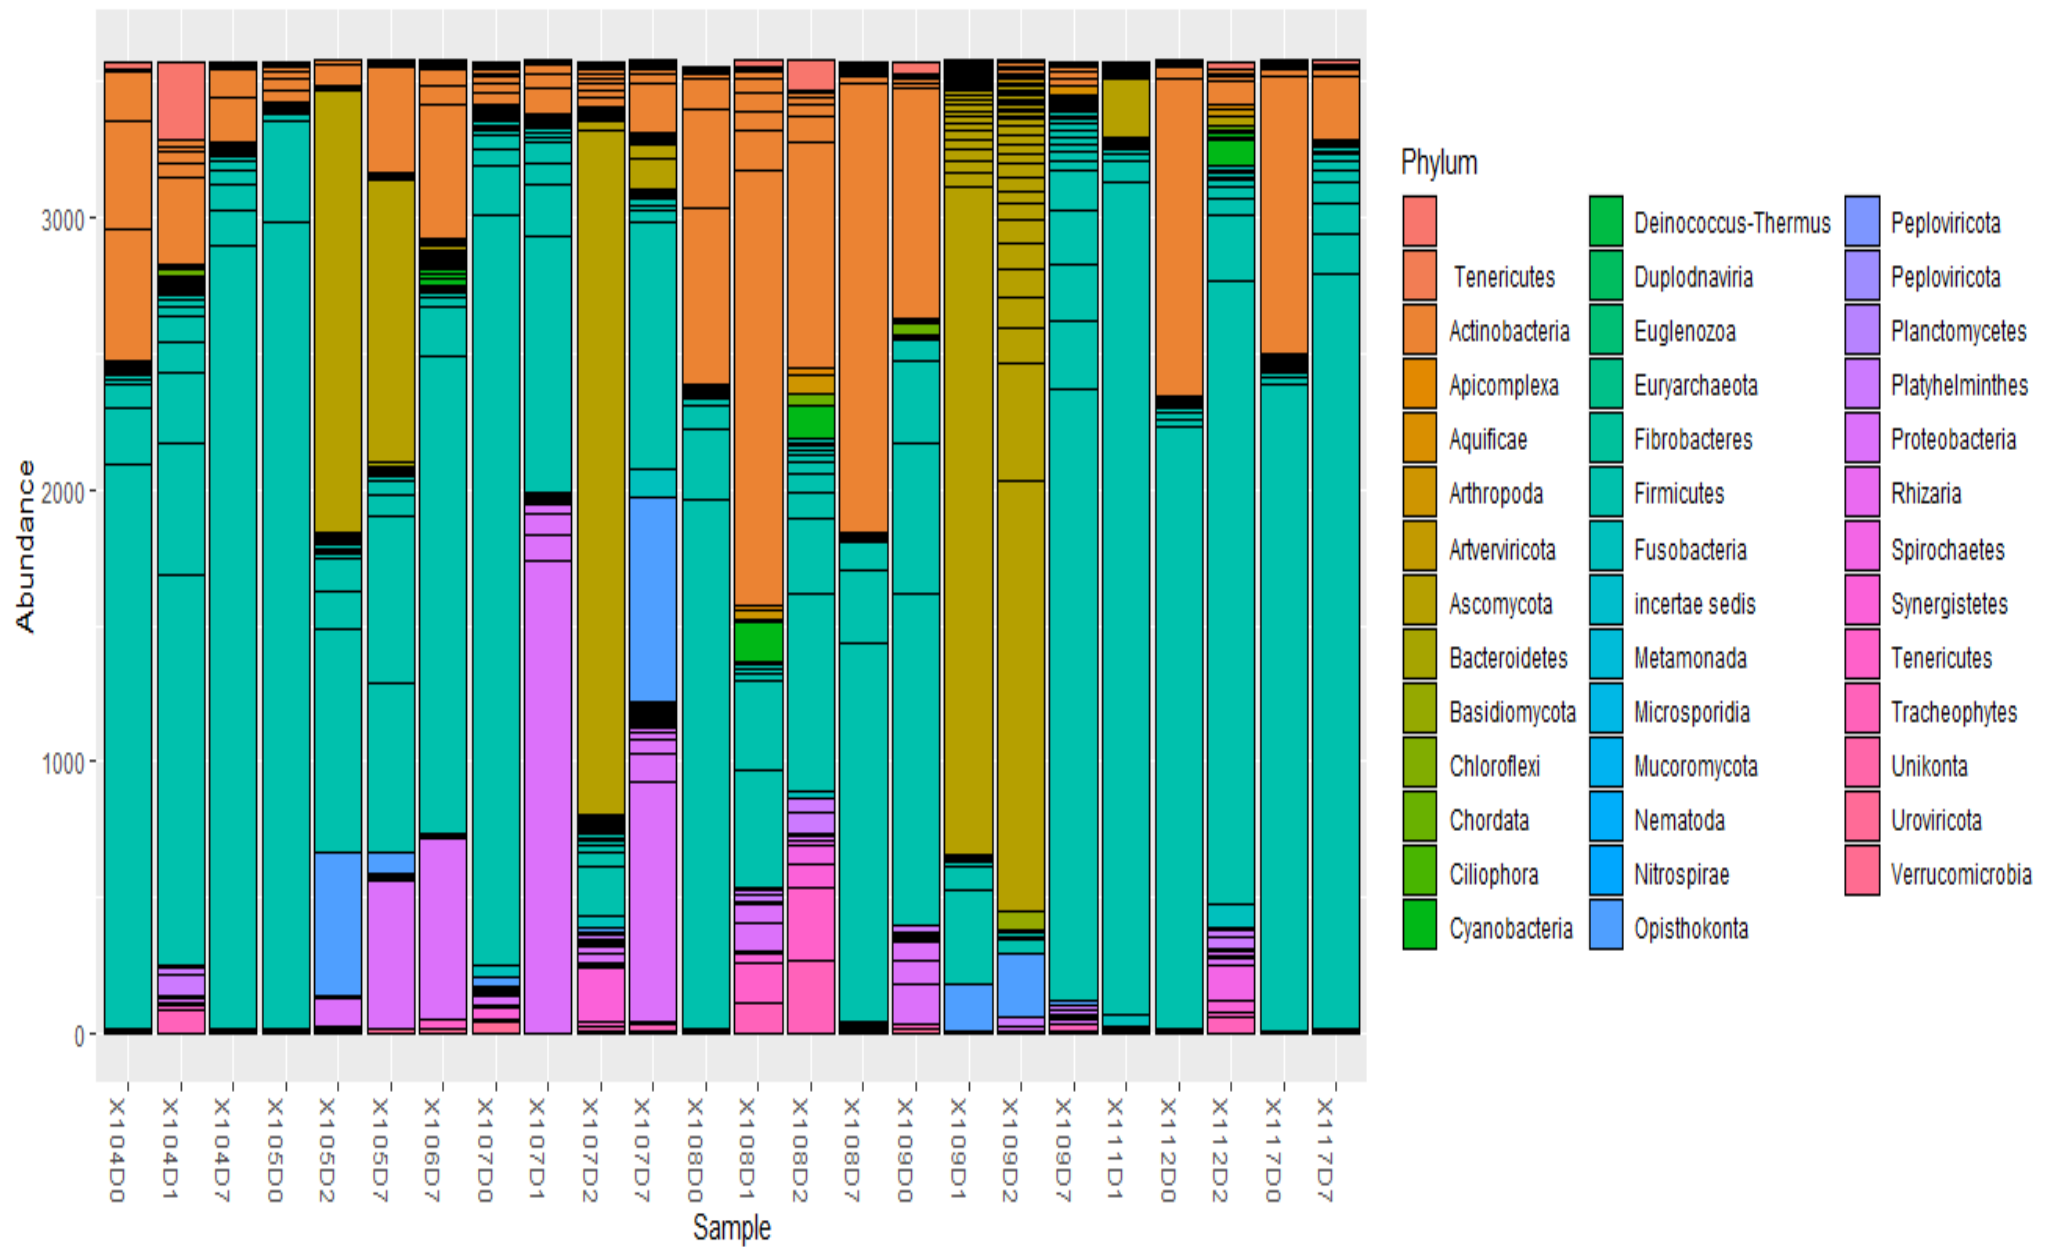

**Figure ii. Abundance of microbial phyla in all sputum samples.** Firmicutes, Actinobacteria, Bacteroidetes, Ascomycota, and Proteobacteria were common phyla in the microbiota.

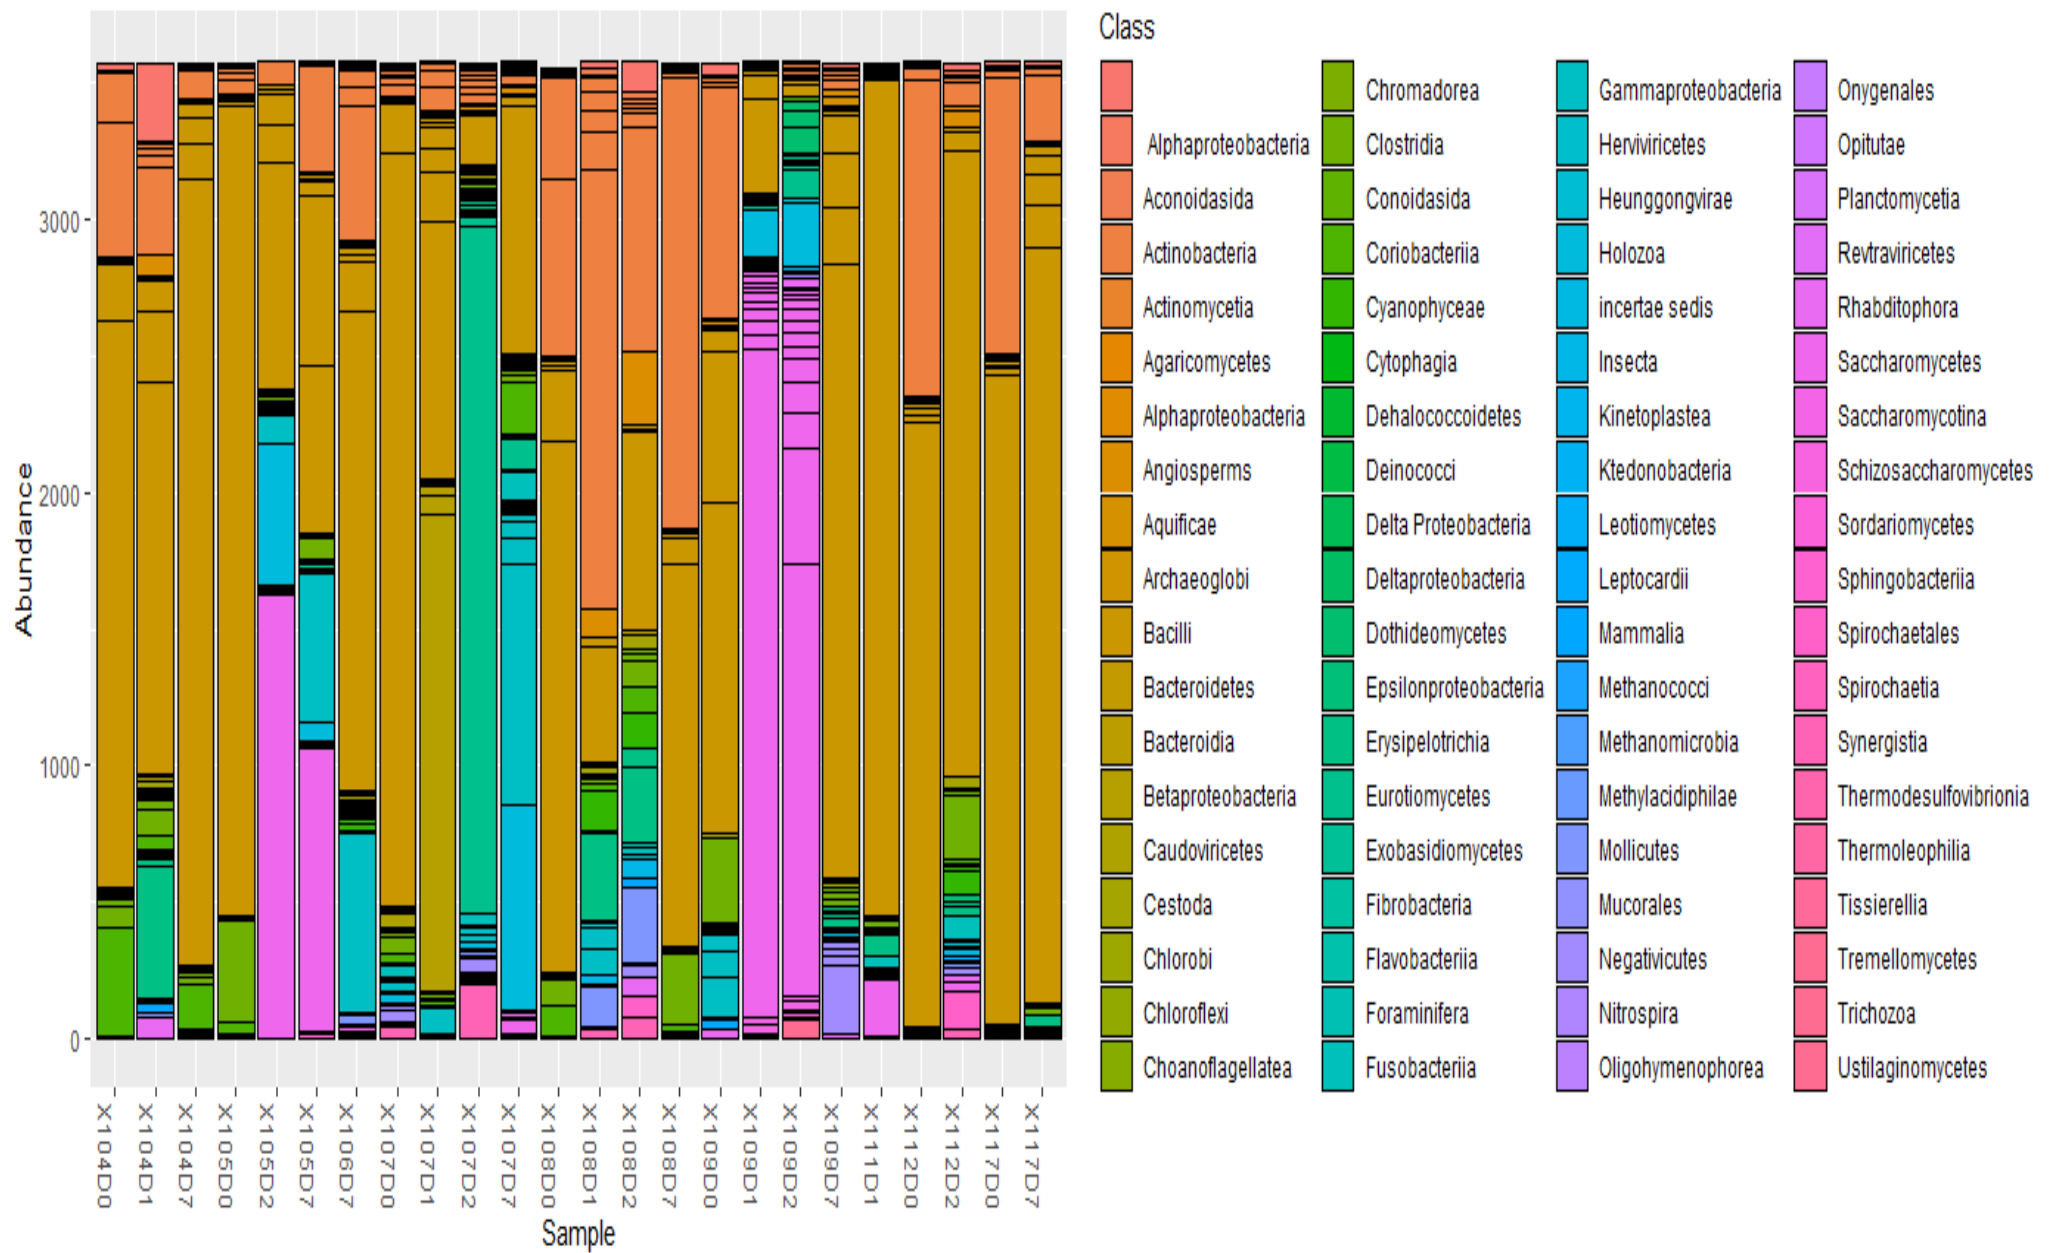

Figure iii. Abundance of microbial class in all sputum samples.

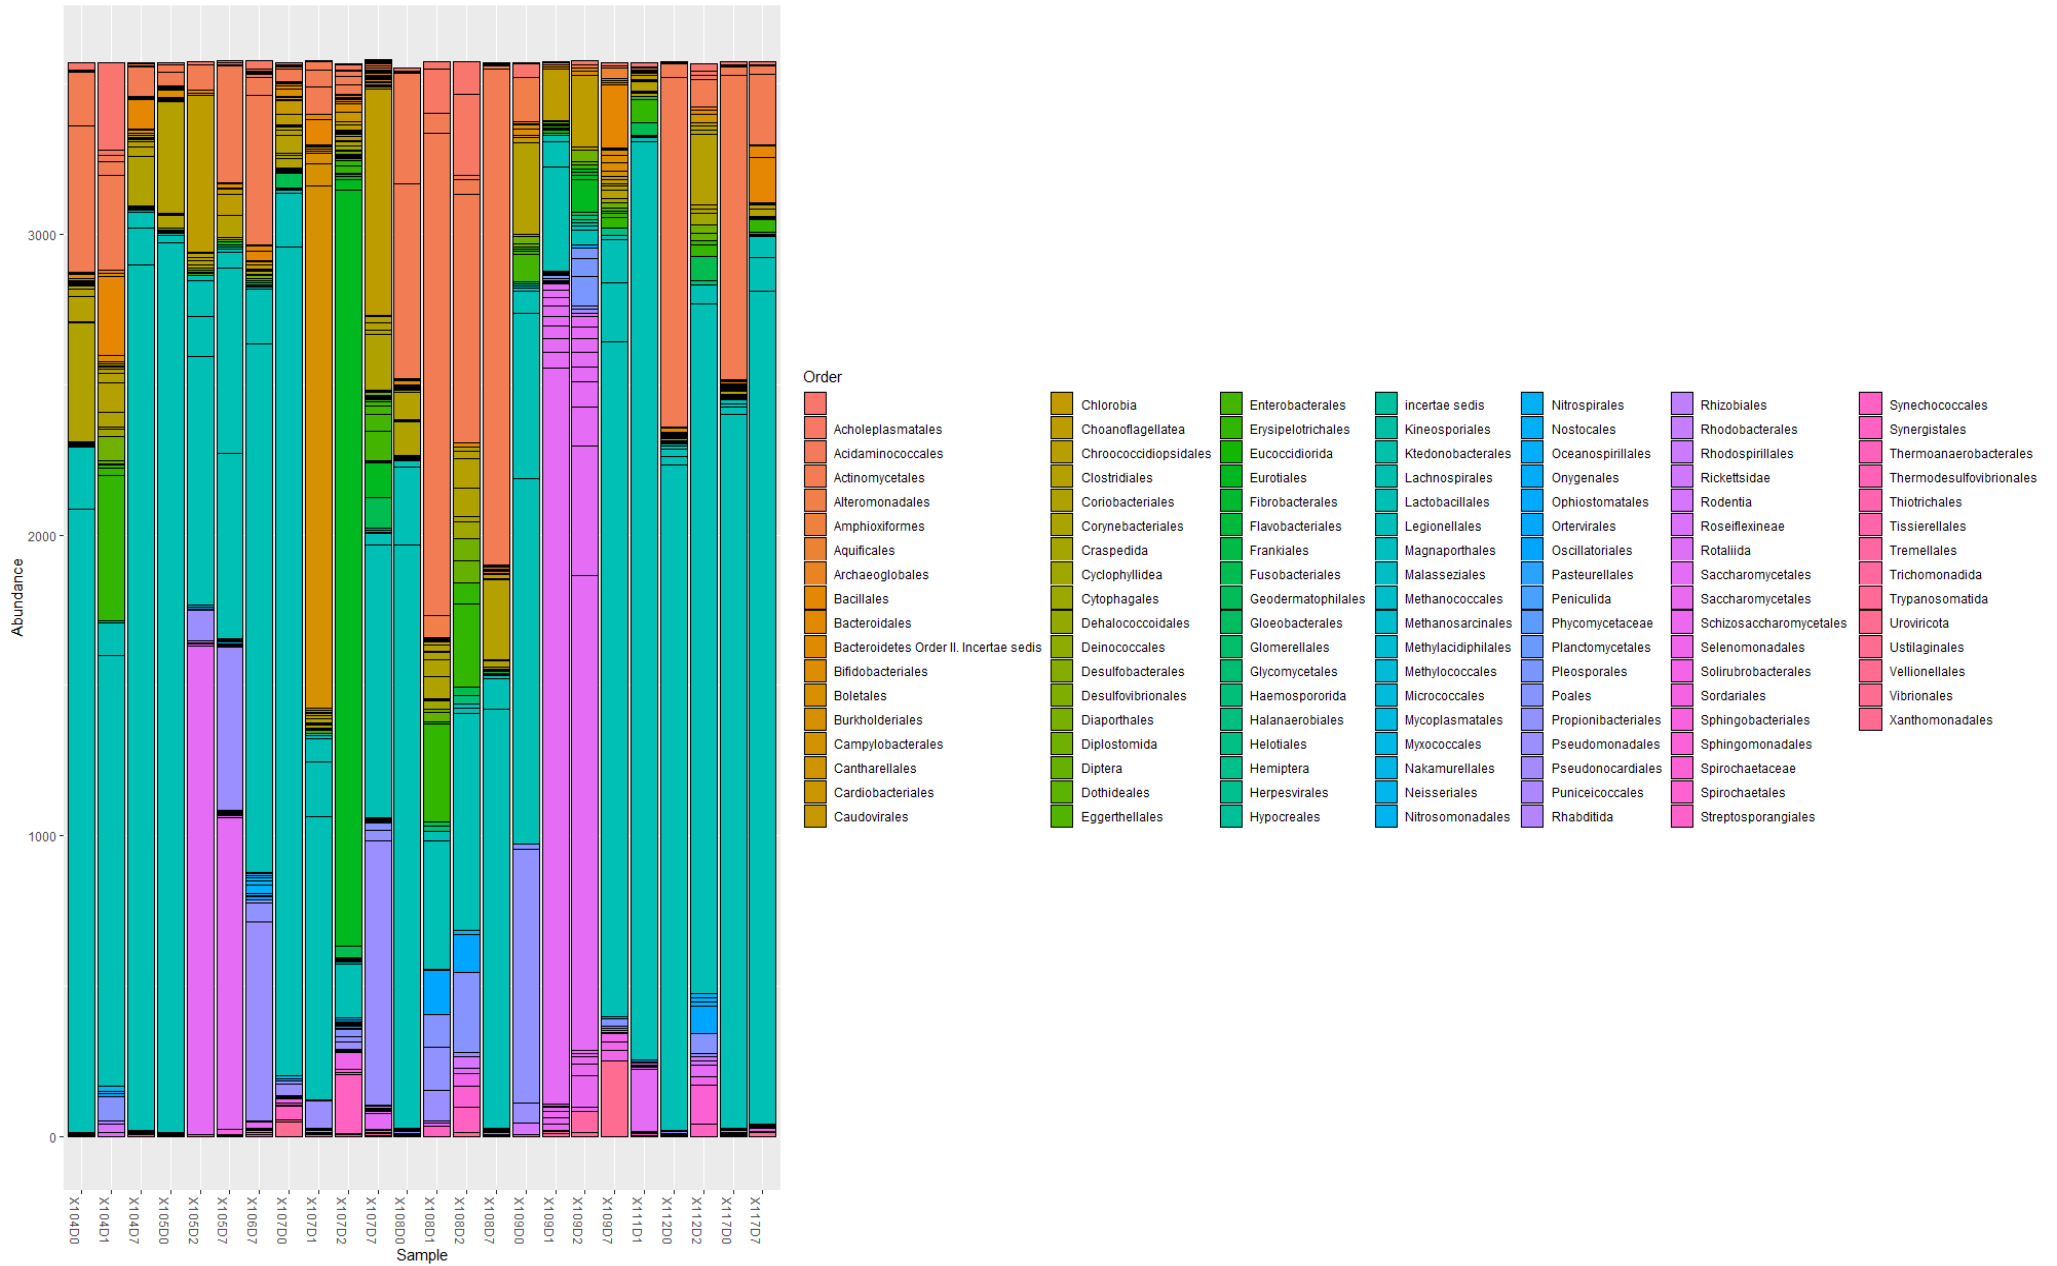

**Figure iv. Abundance of microbial order in all sputum samples**





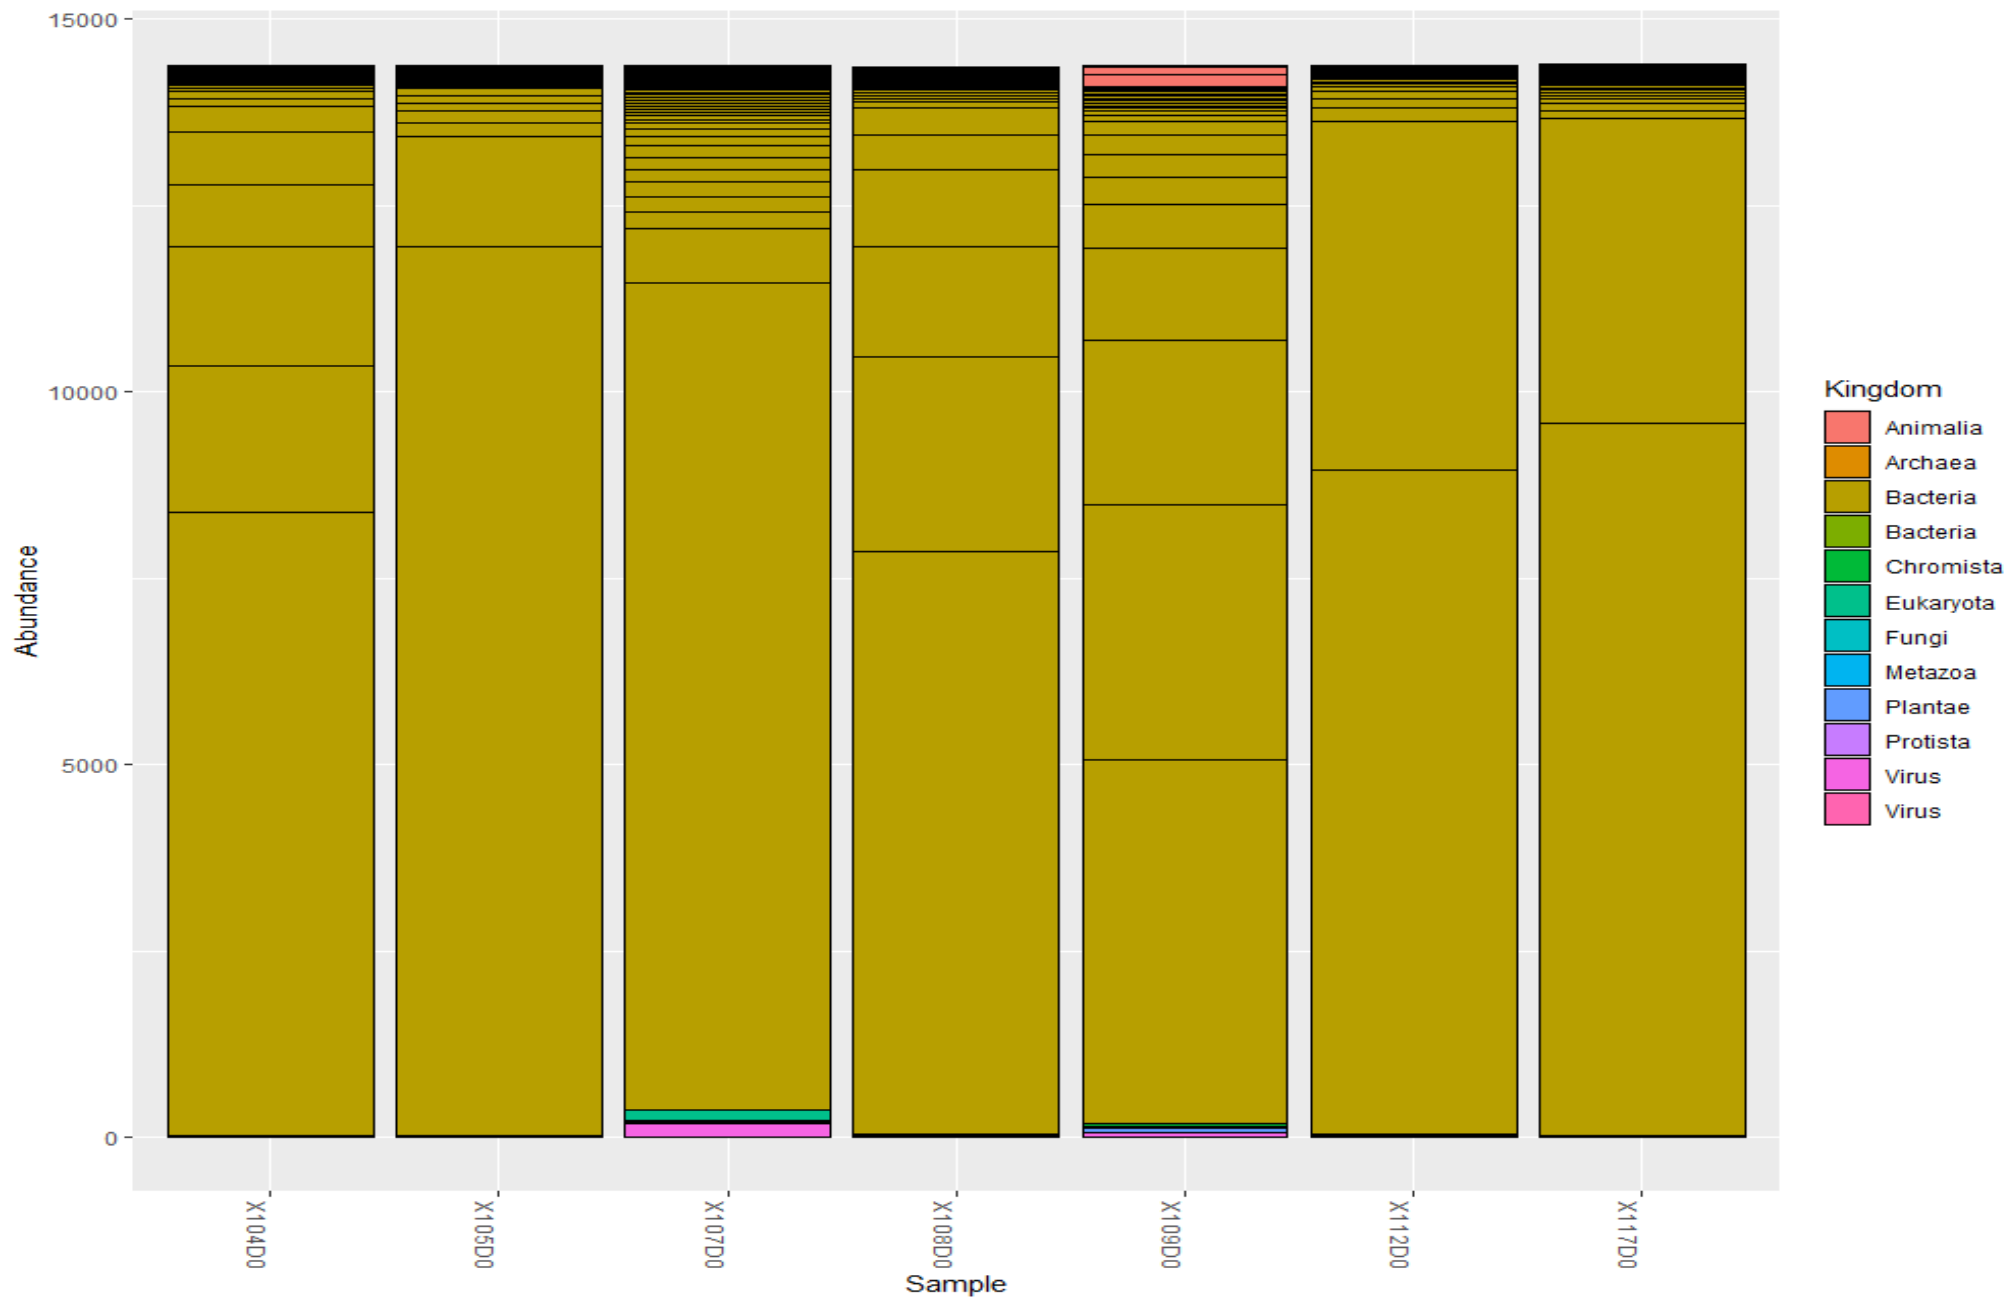

**Figure vii. Abundance of microbial Kingdoms in baseline samples.** Bacteria were the most abundant Kingdom/Division in the baseline sputum samples.

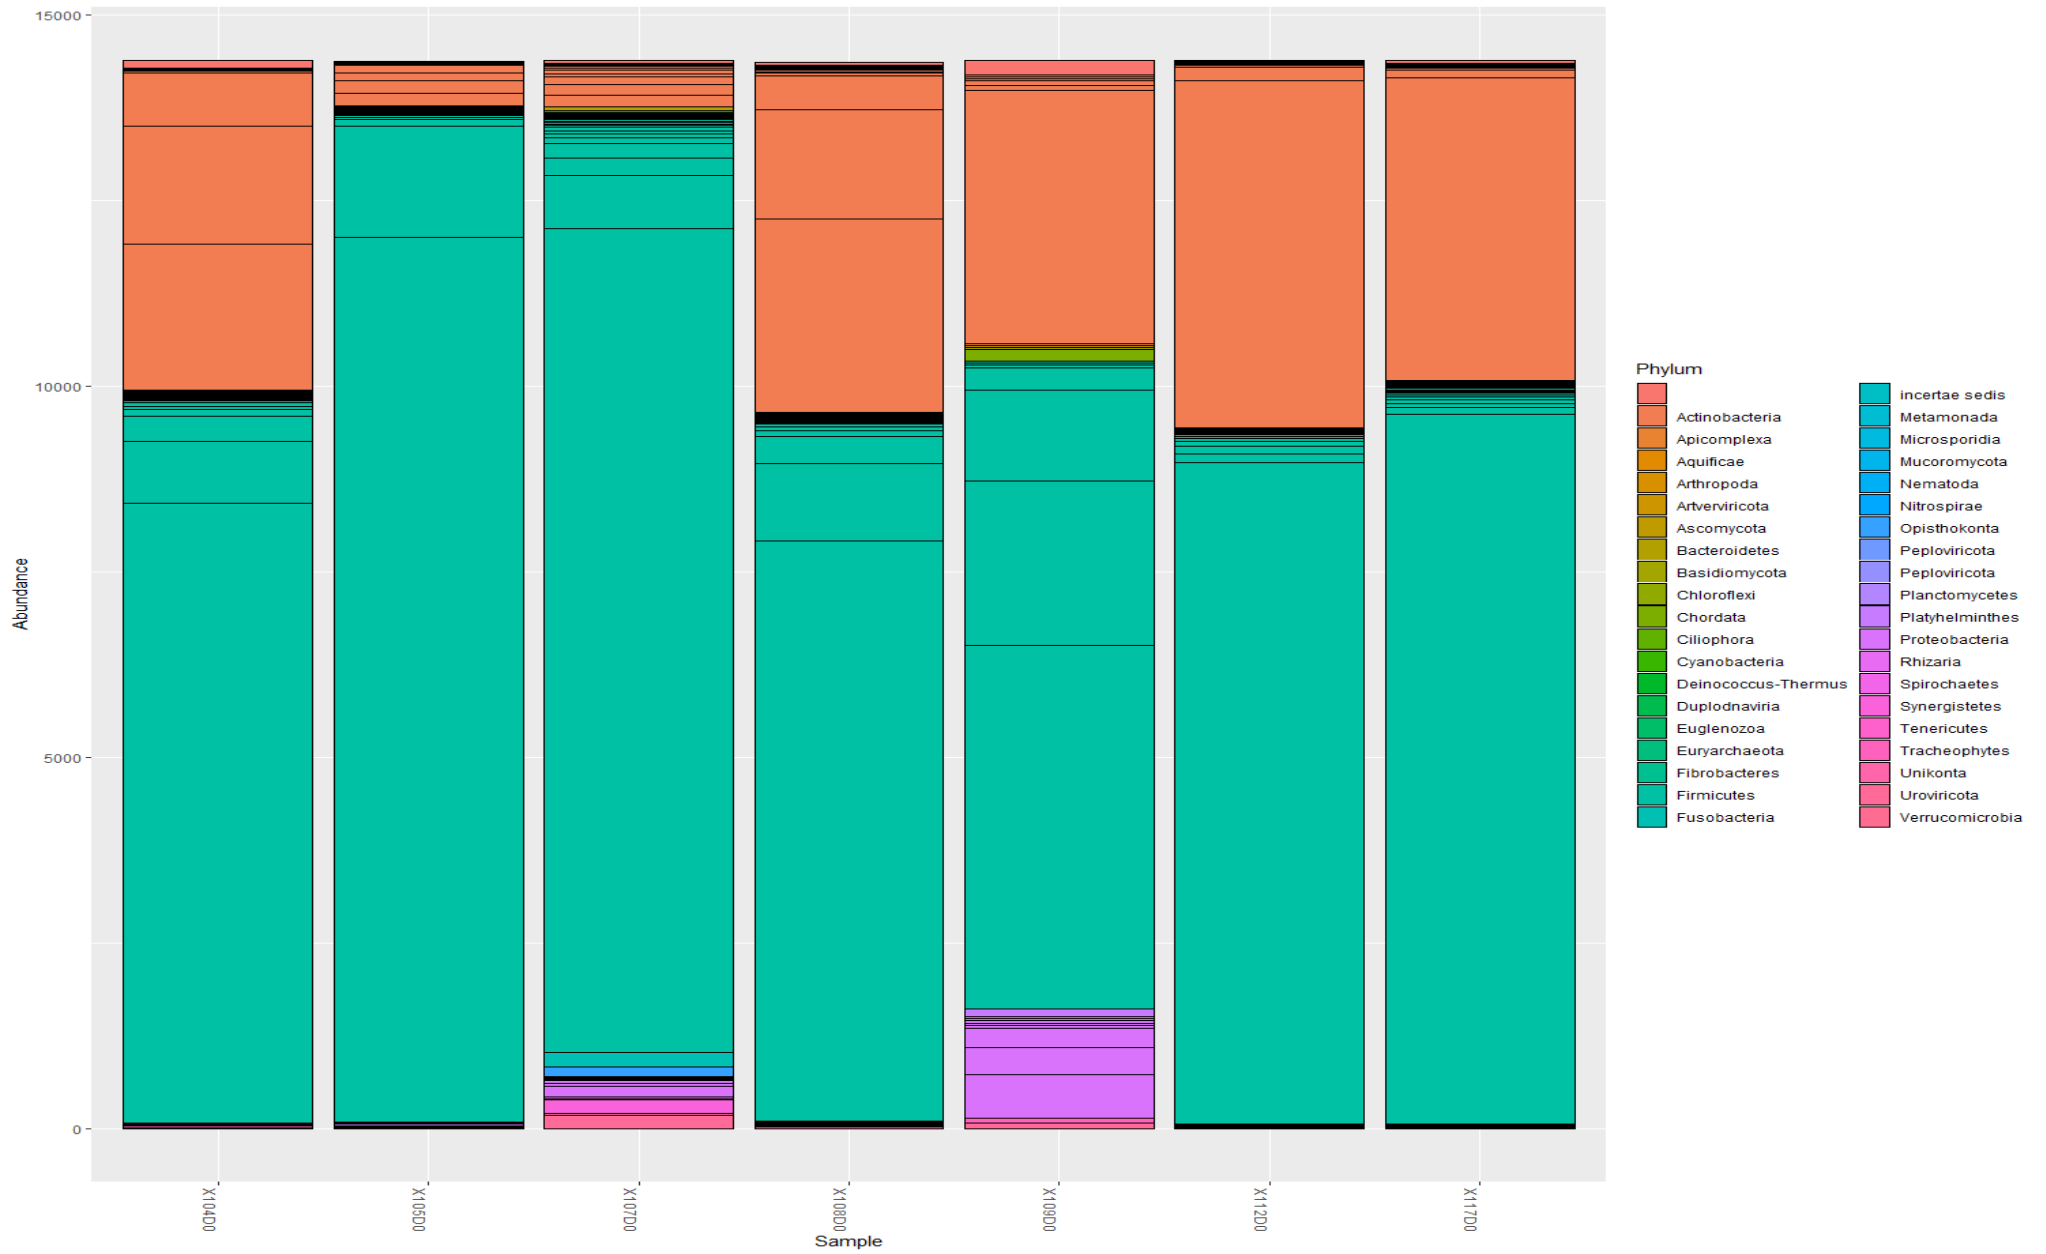

**Figure viii. Abundance of microbial Phyla in baseline samples.** Actinobacteria and Firmicutes were the major phyla in the baseline samples.



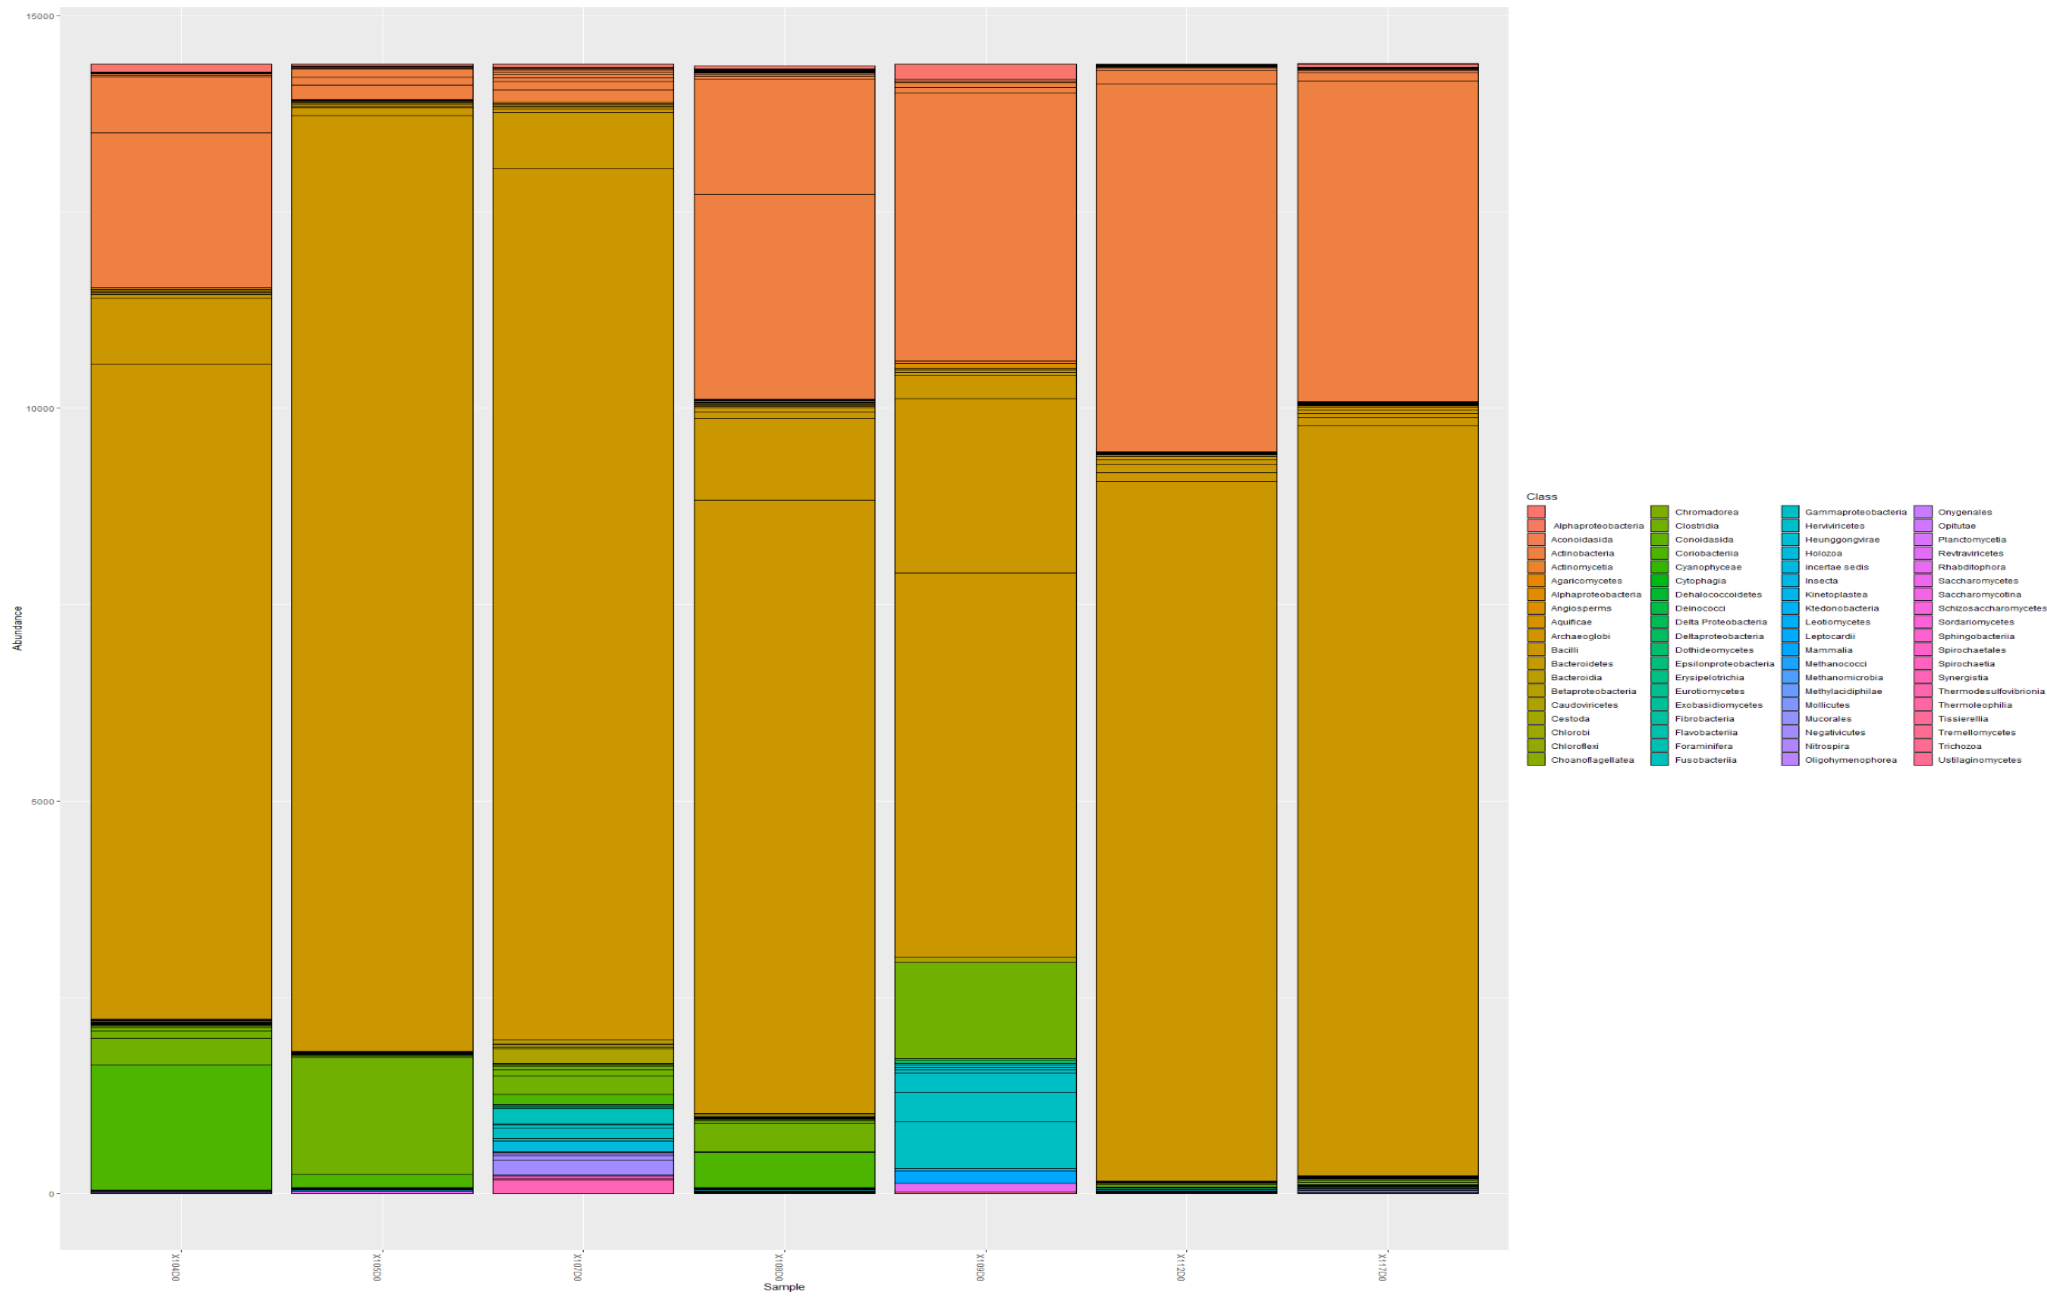

Figure ix. Abundance of microbial classes in baseline sputum samples. Bacilli and Actinobacteria were common phyla.







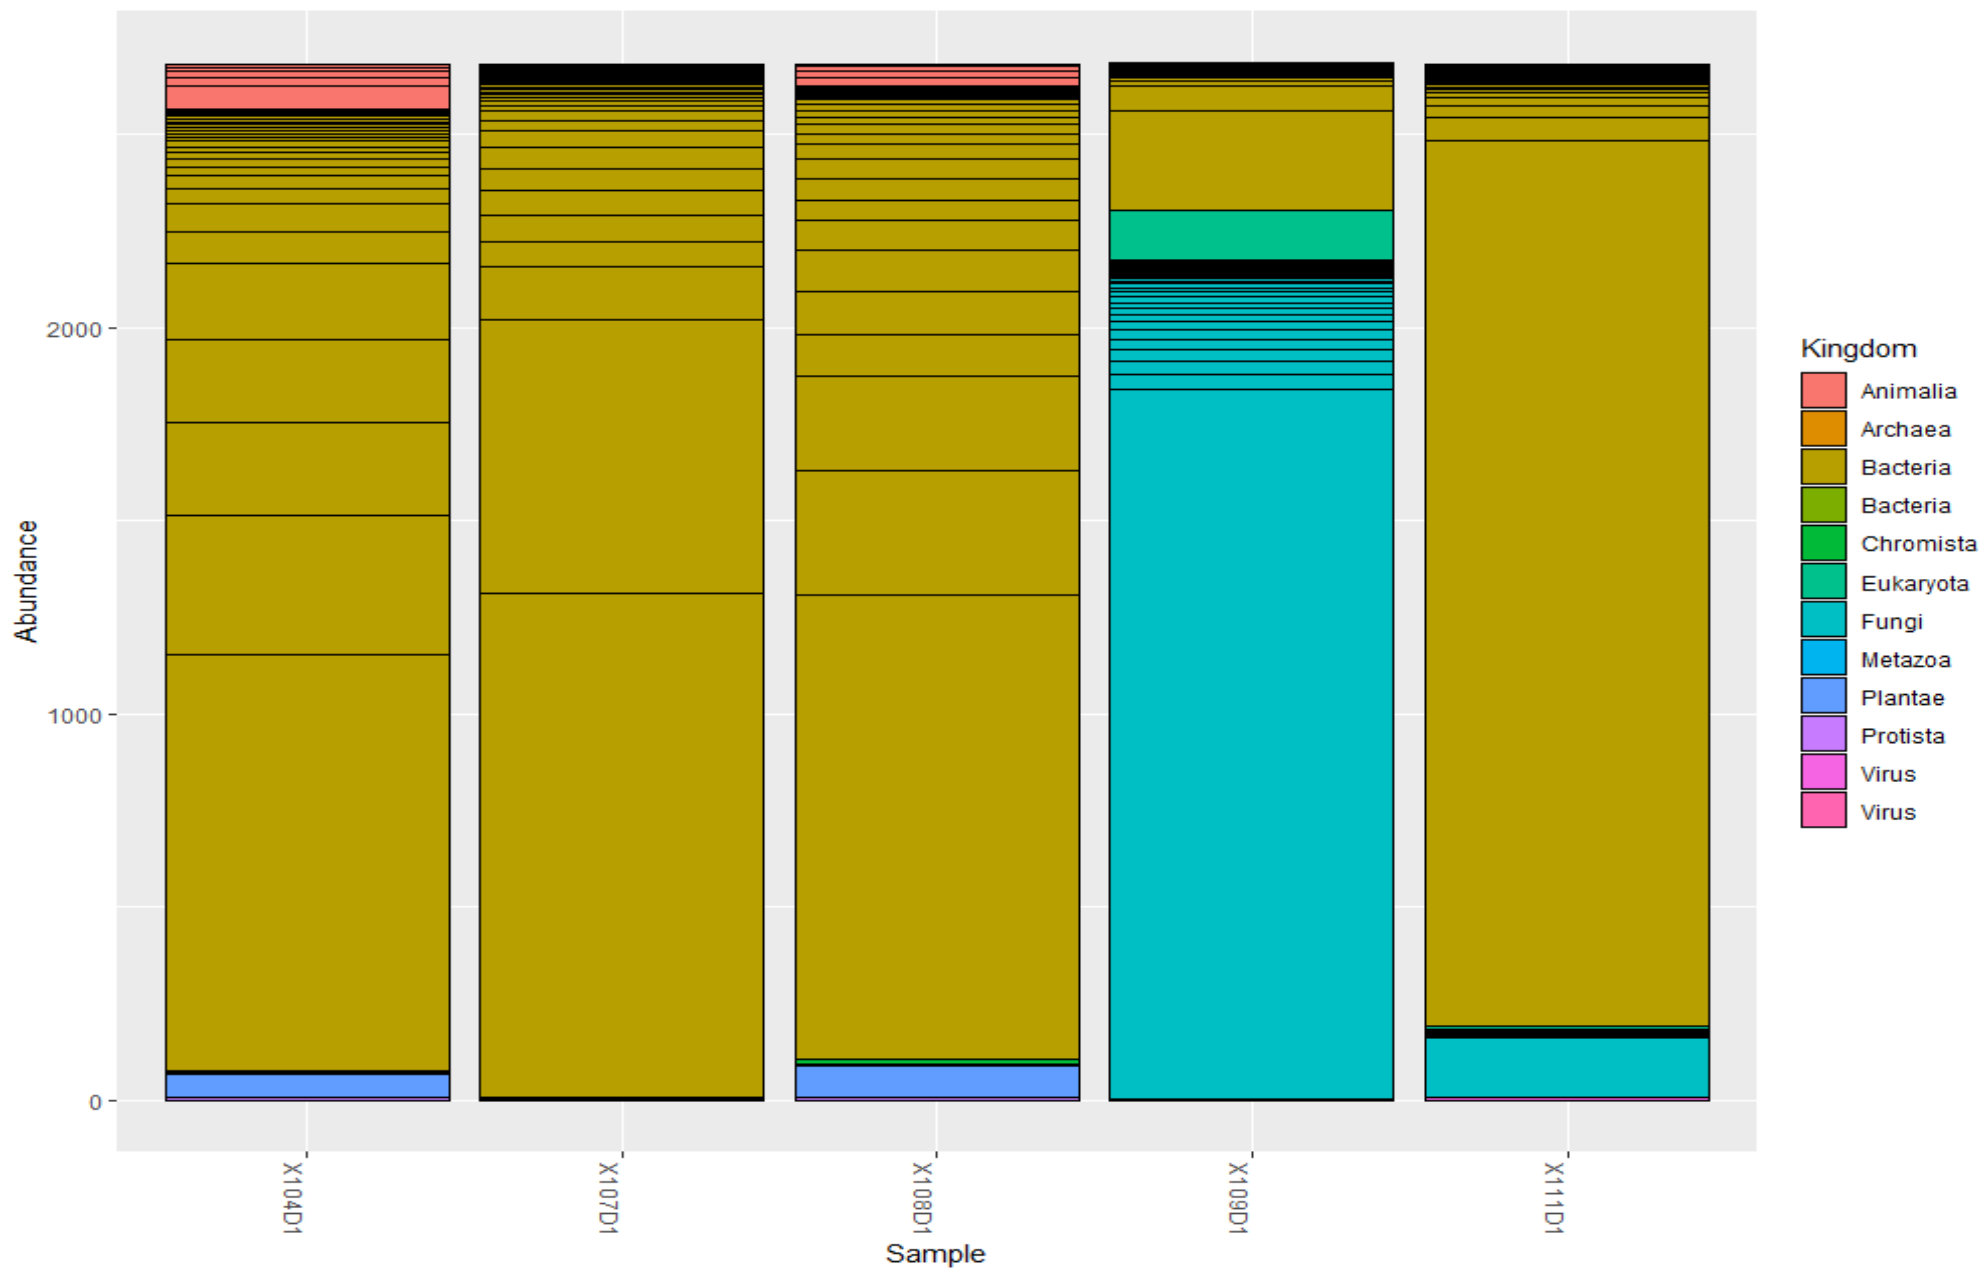

Figure xiii. Abundance of microbial kingdom in day 1 sputum samples

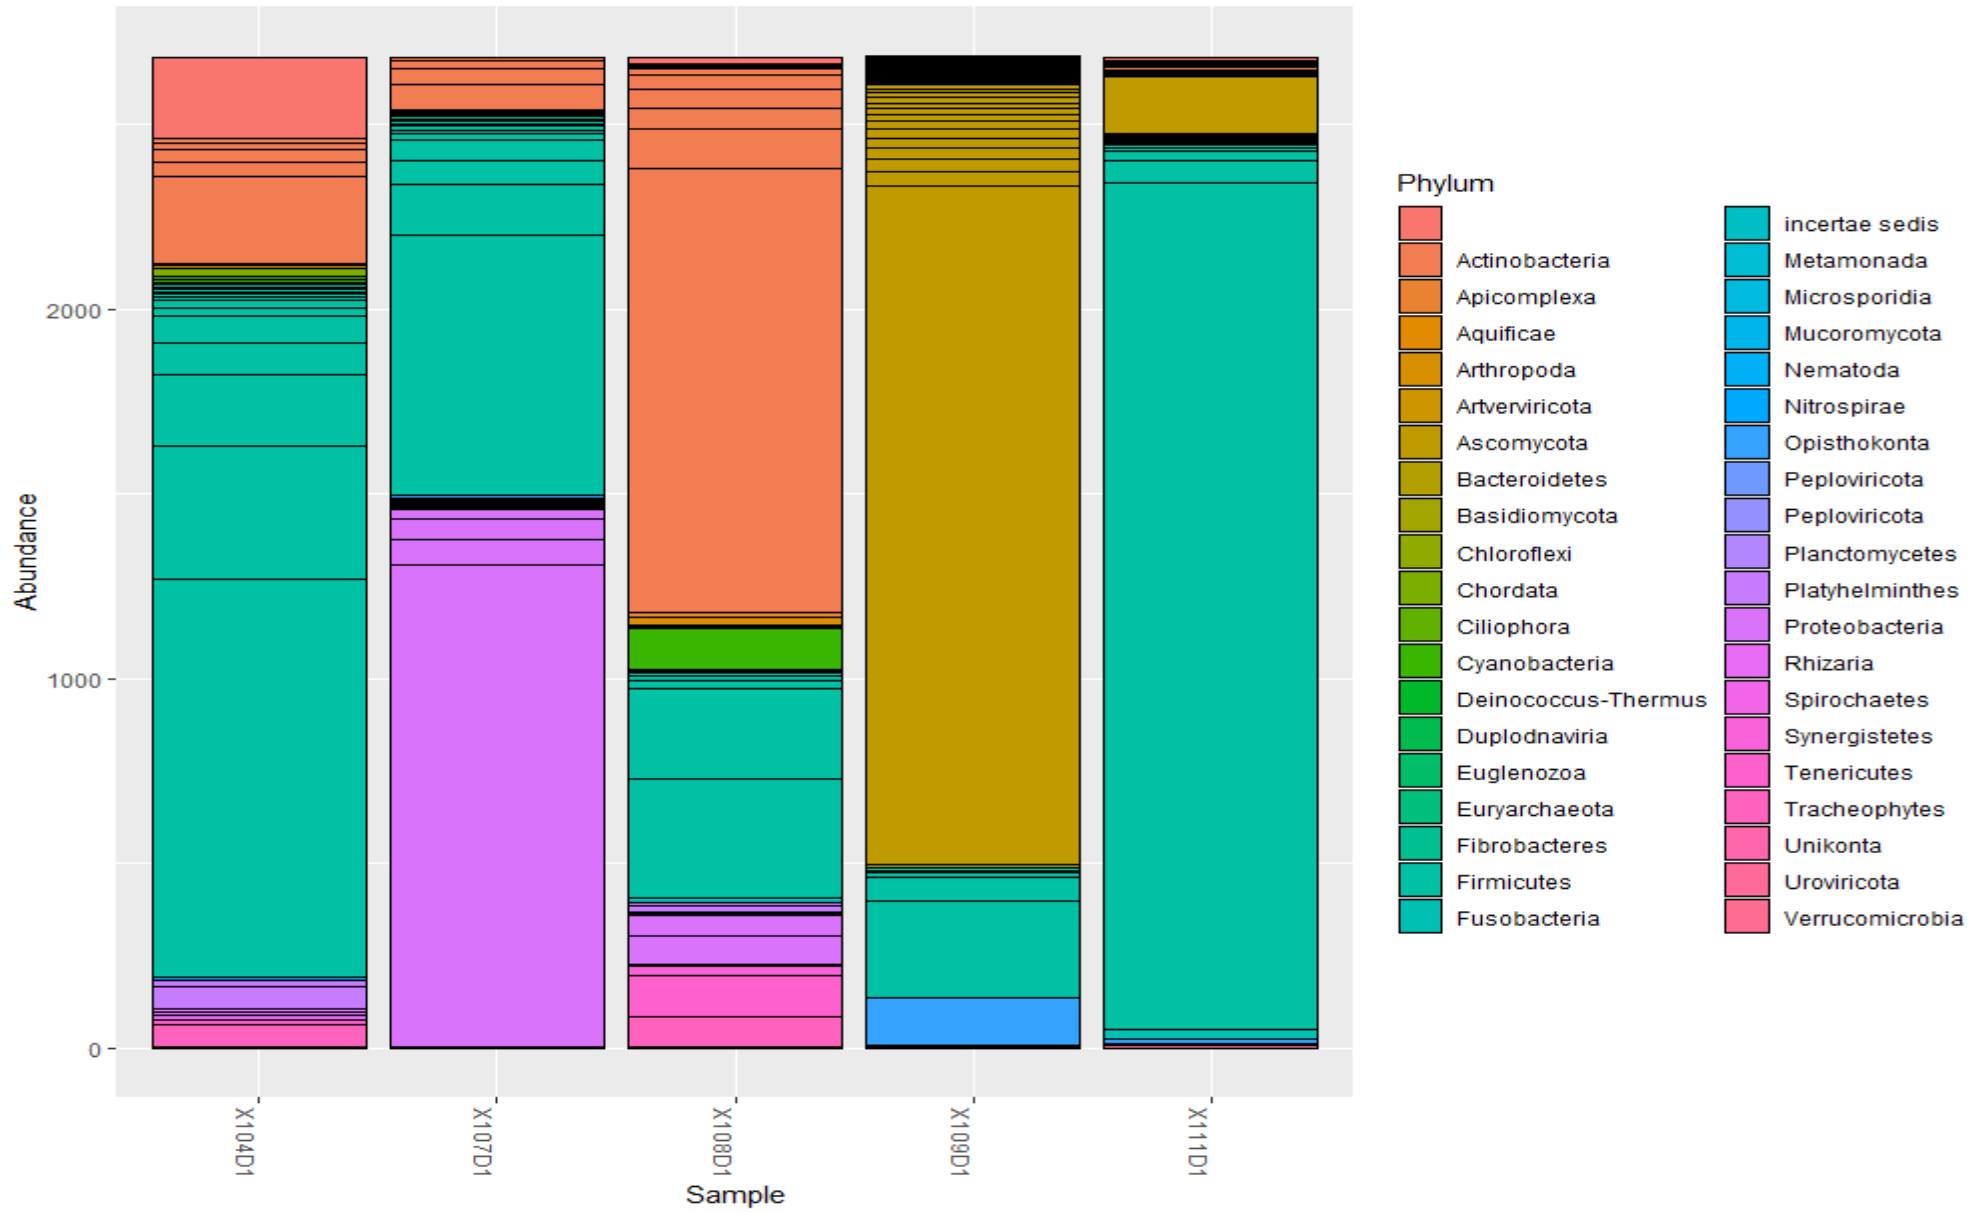

Figure xiv. Abundance of microbial phylum in day 1 sputum samples

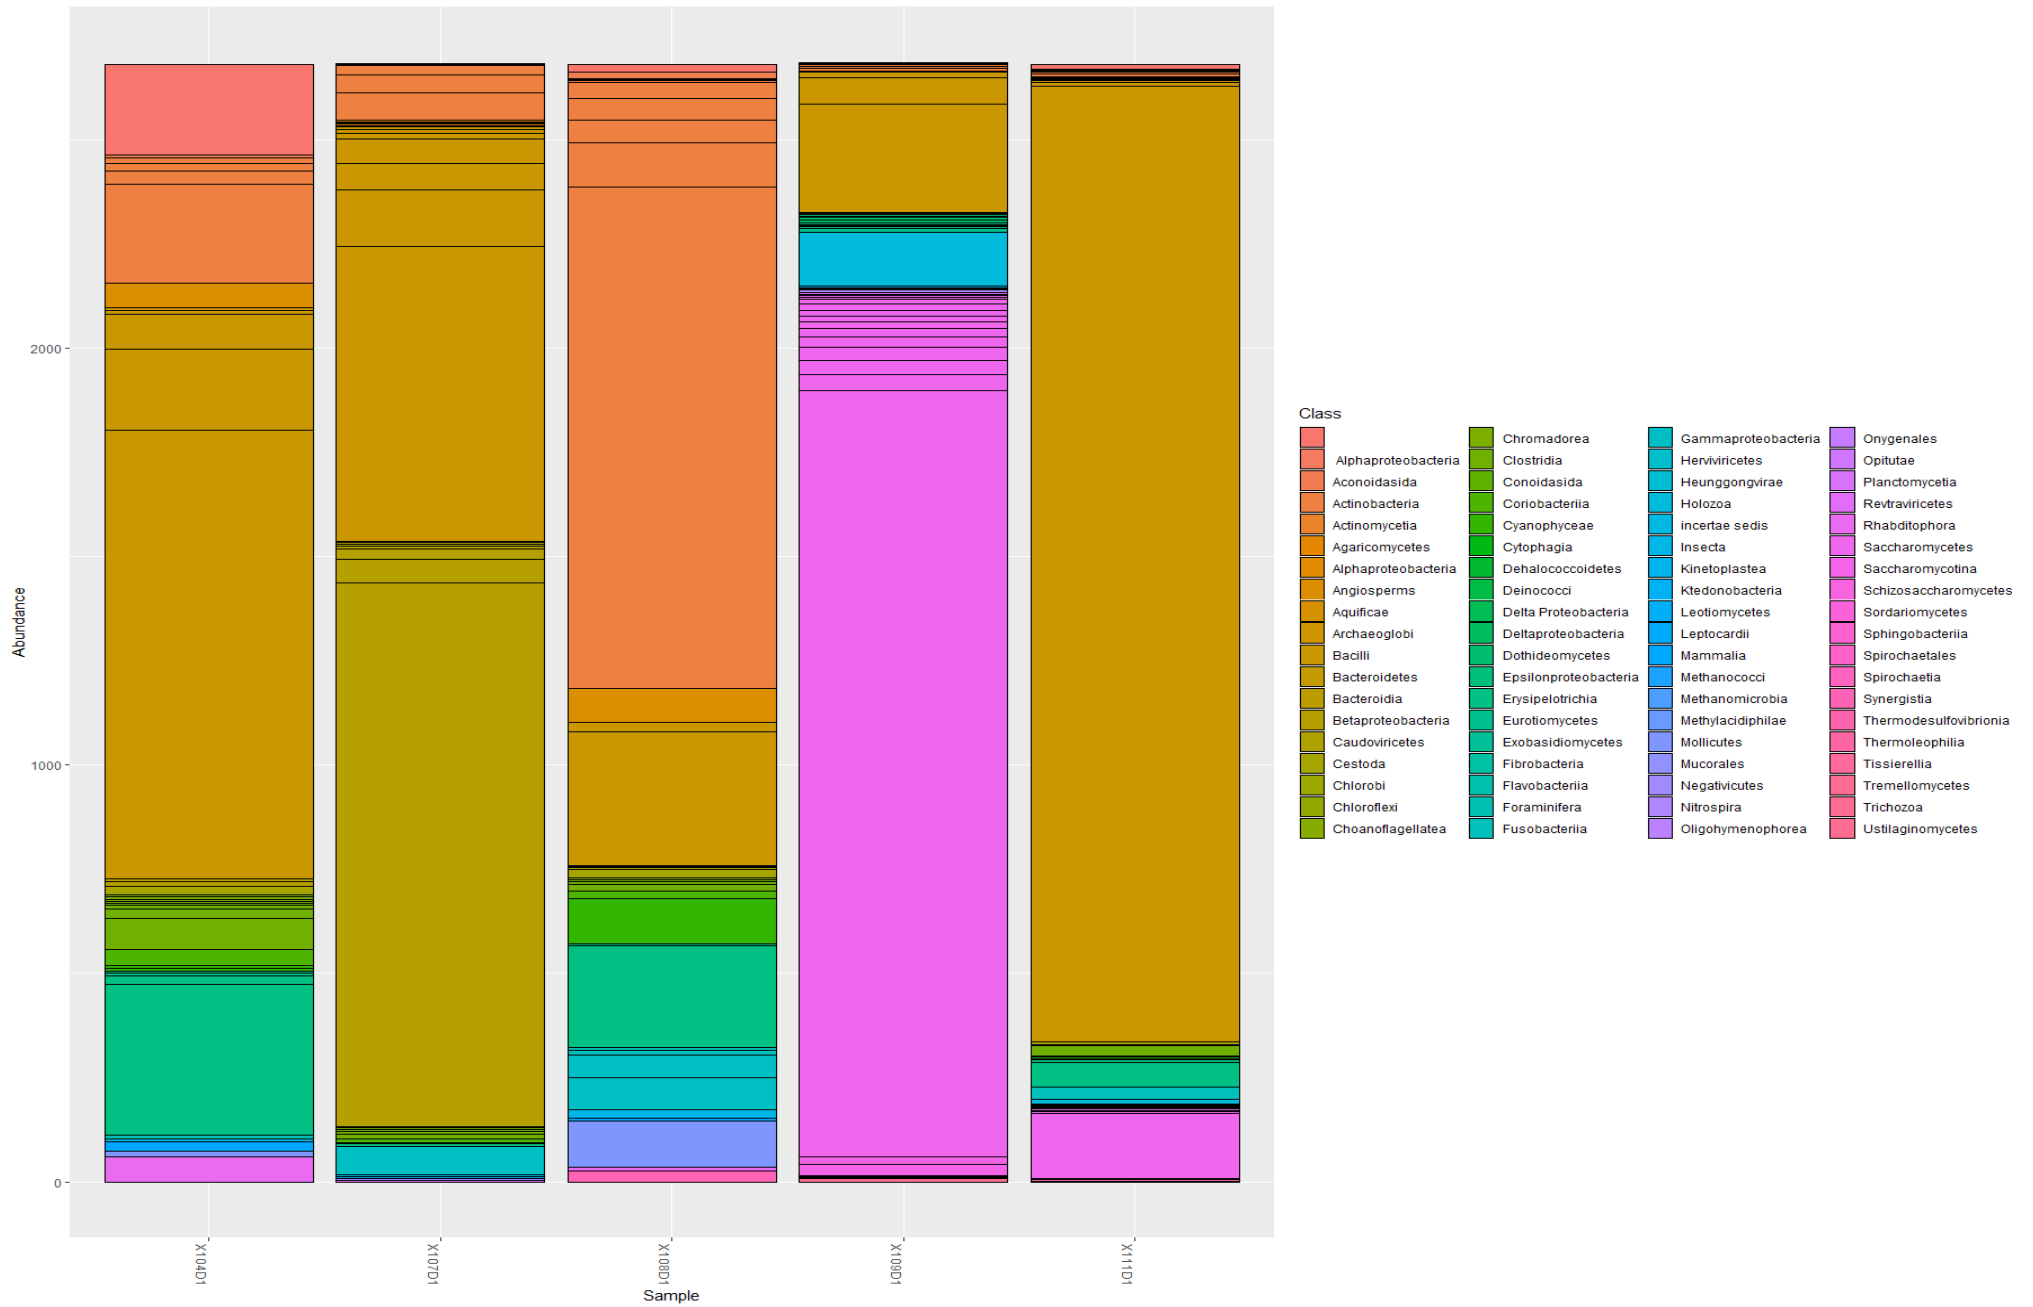

Figure xv. Abundance of microbial classes in day 1 sputum samples

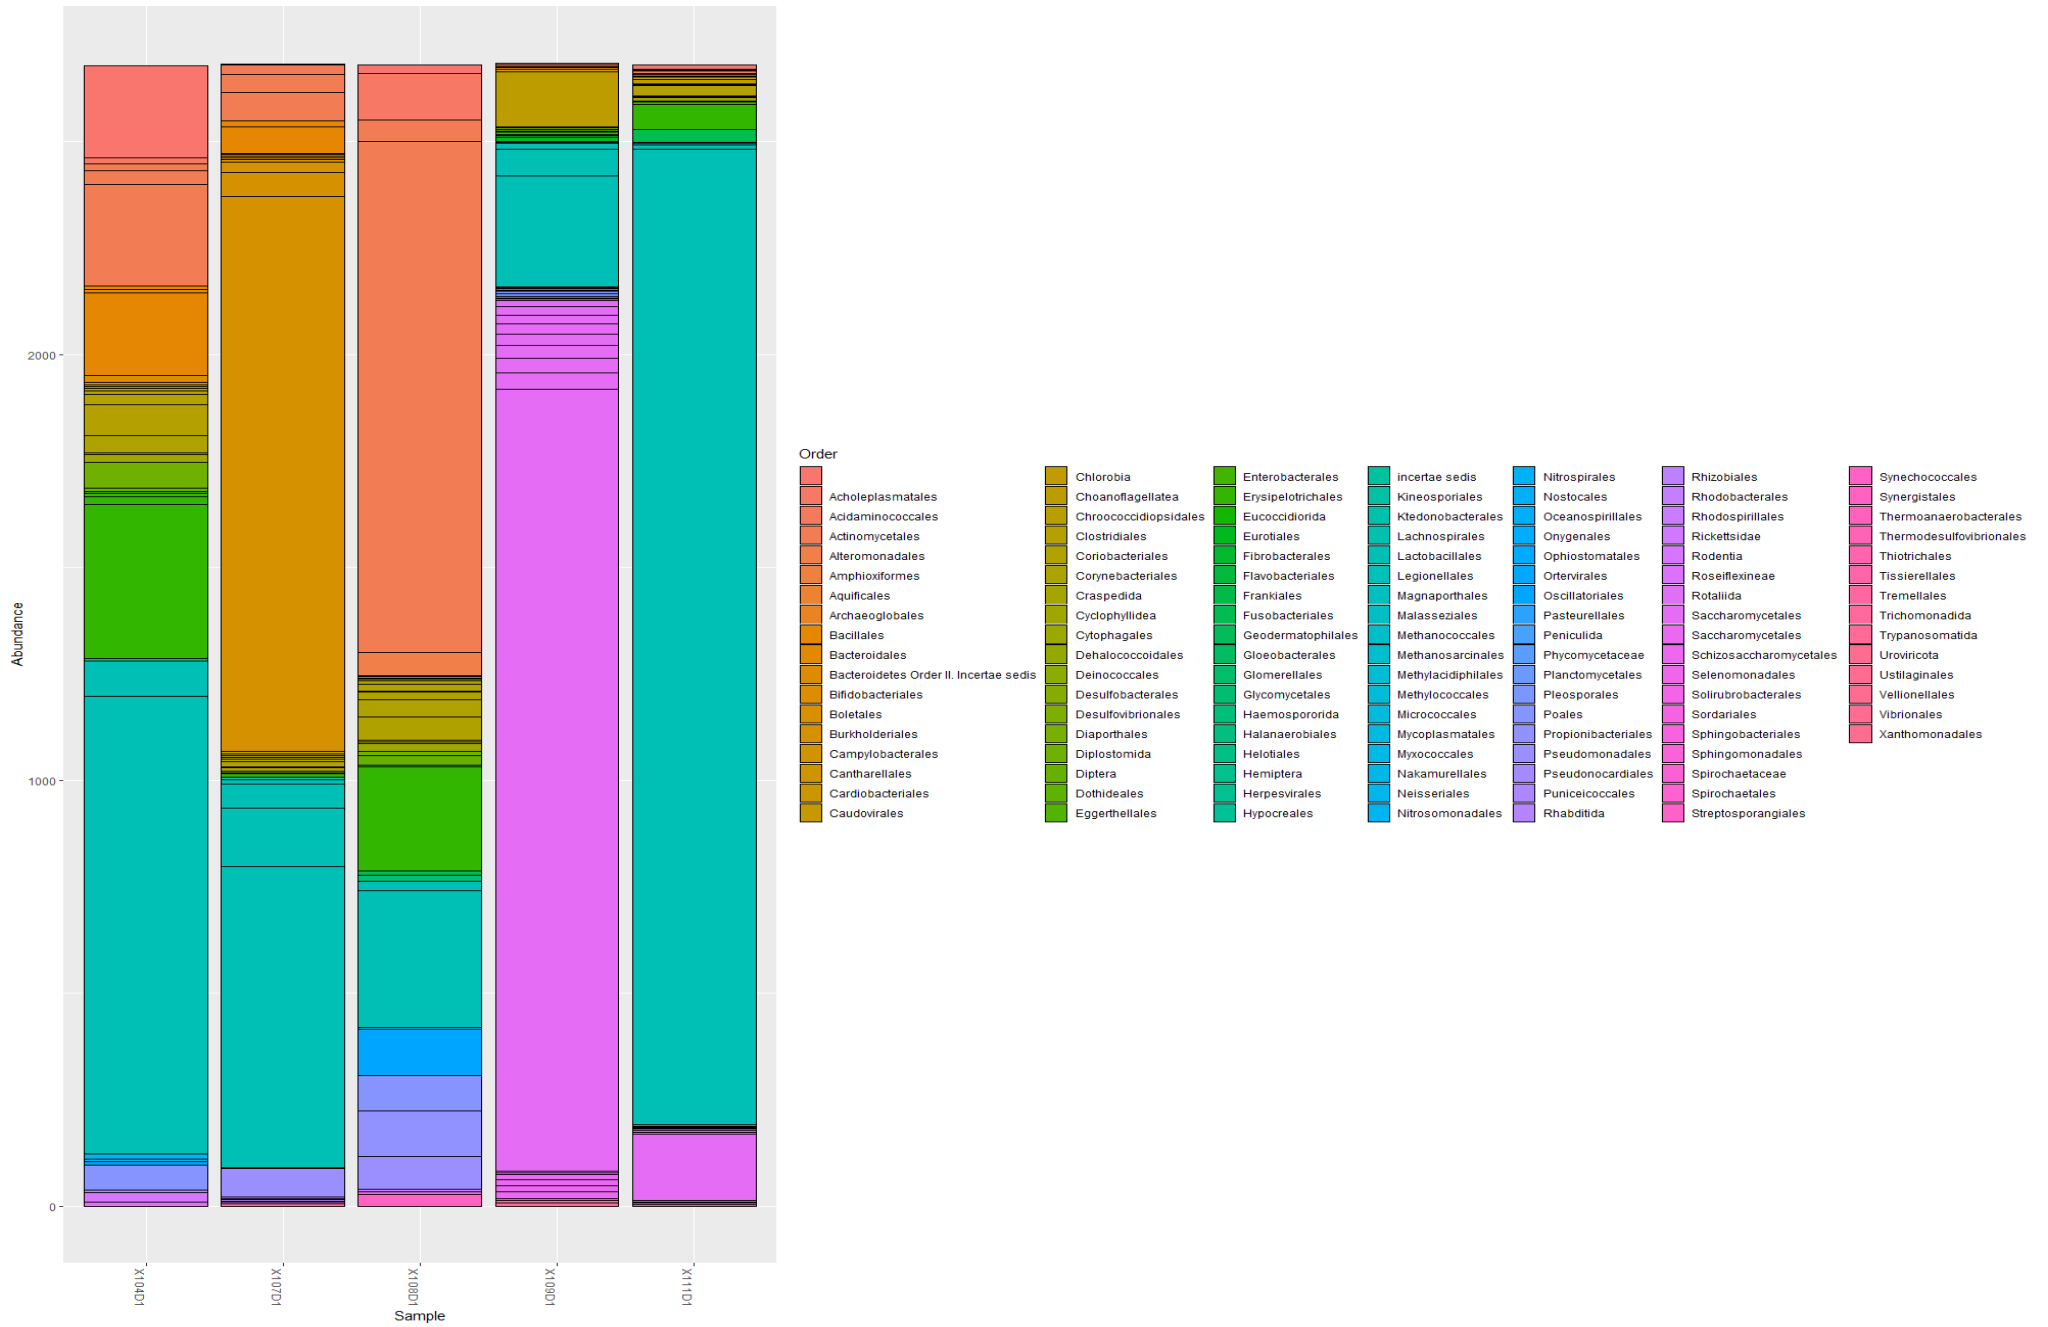

Figure xvi. Abundance of microbial orders in day 1 sputum samples







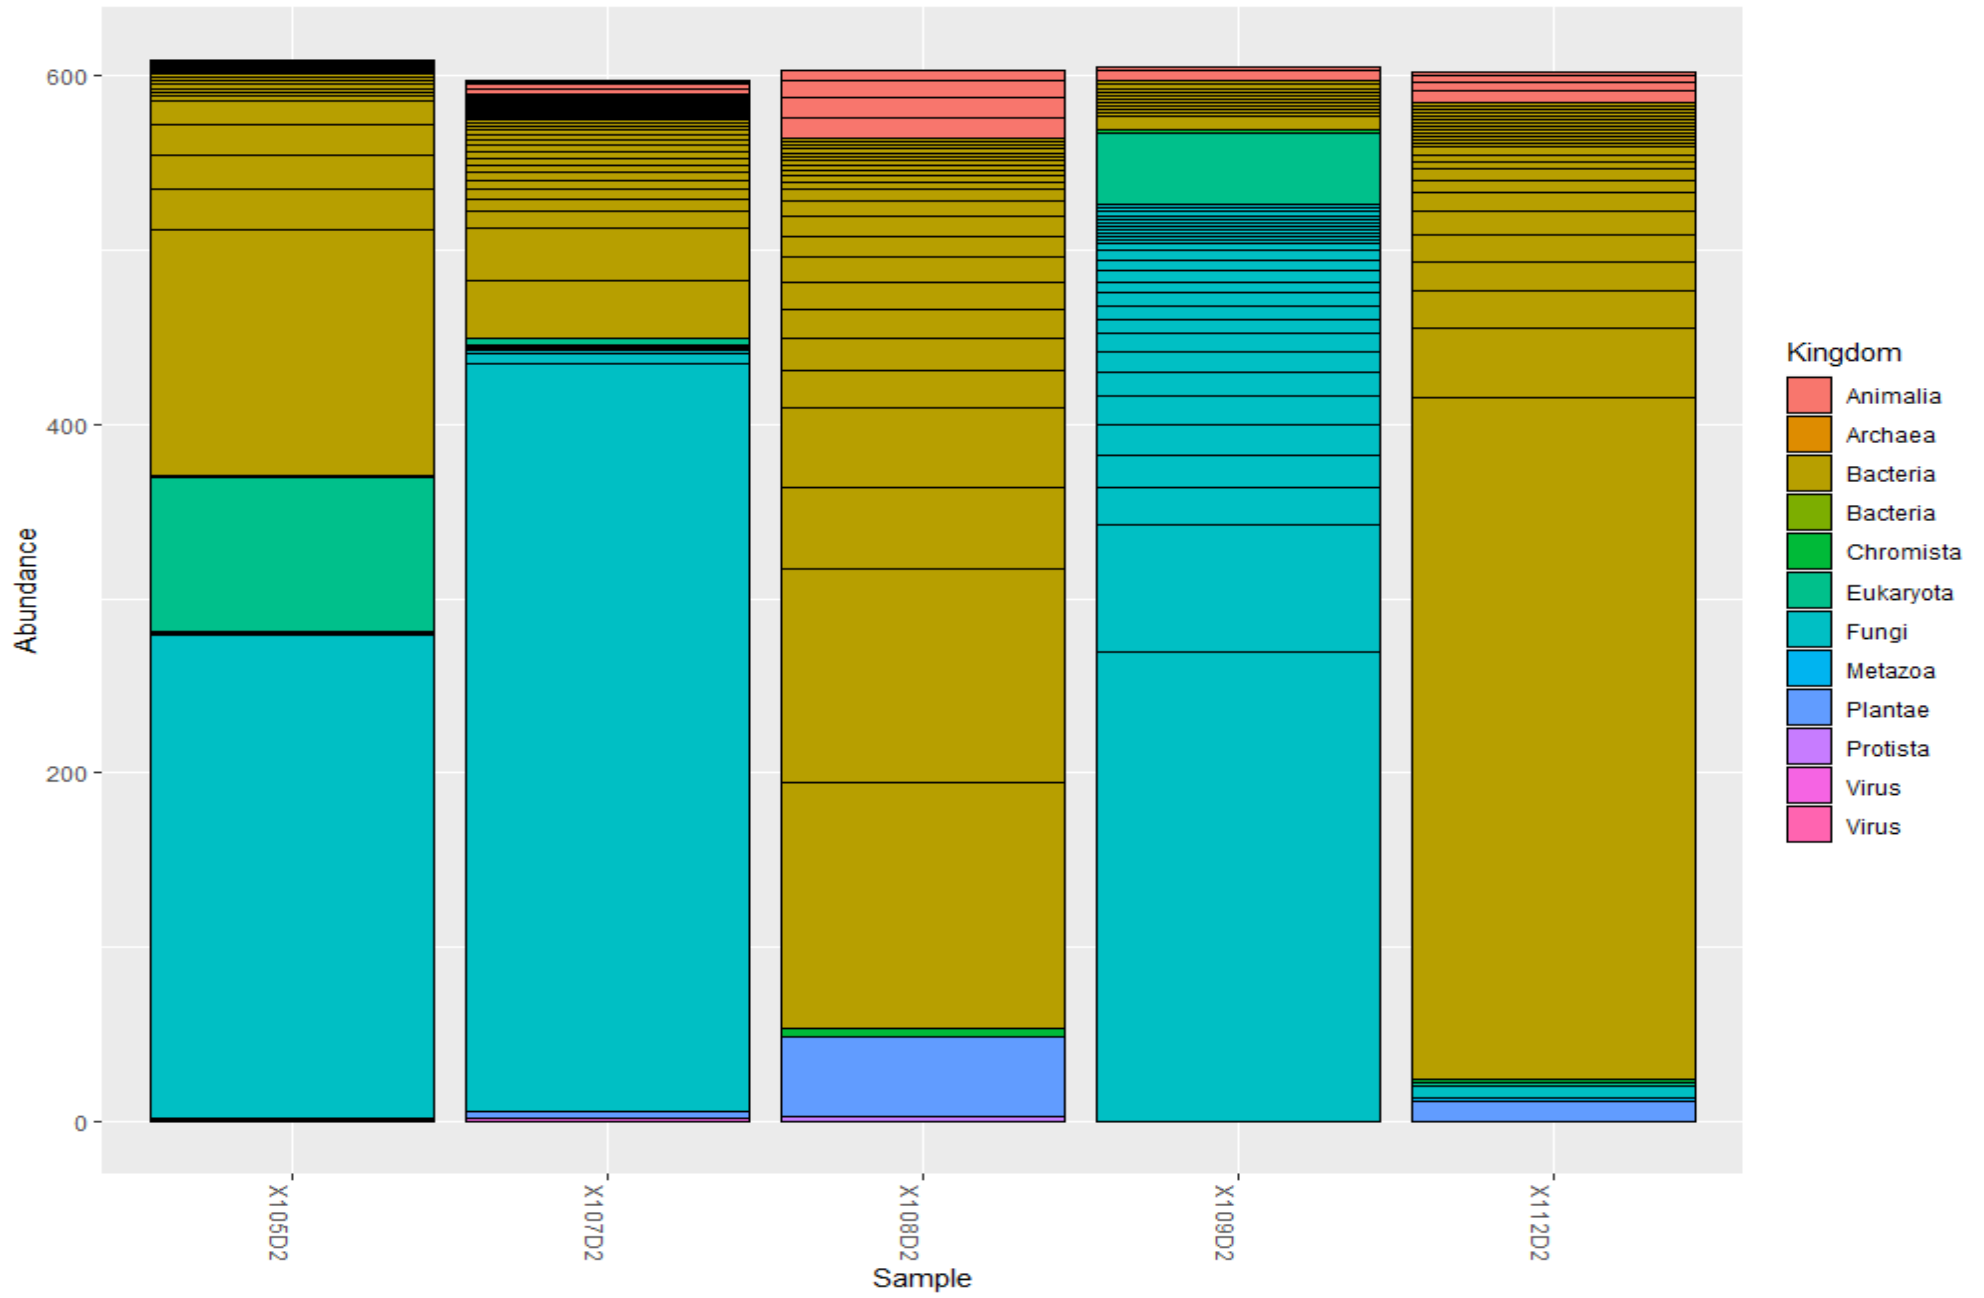

Figure xix. Abundance of microbial Kingdoms in day 2 sputum samples.

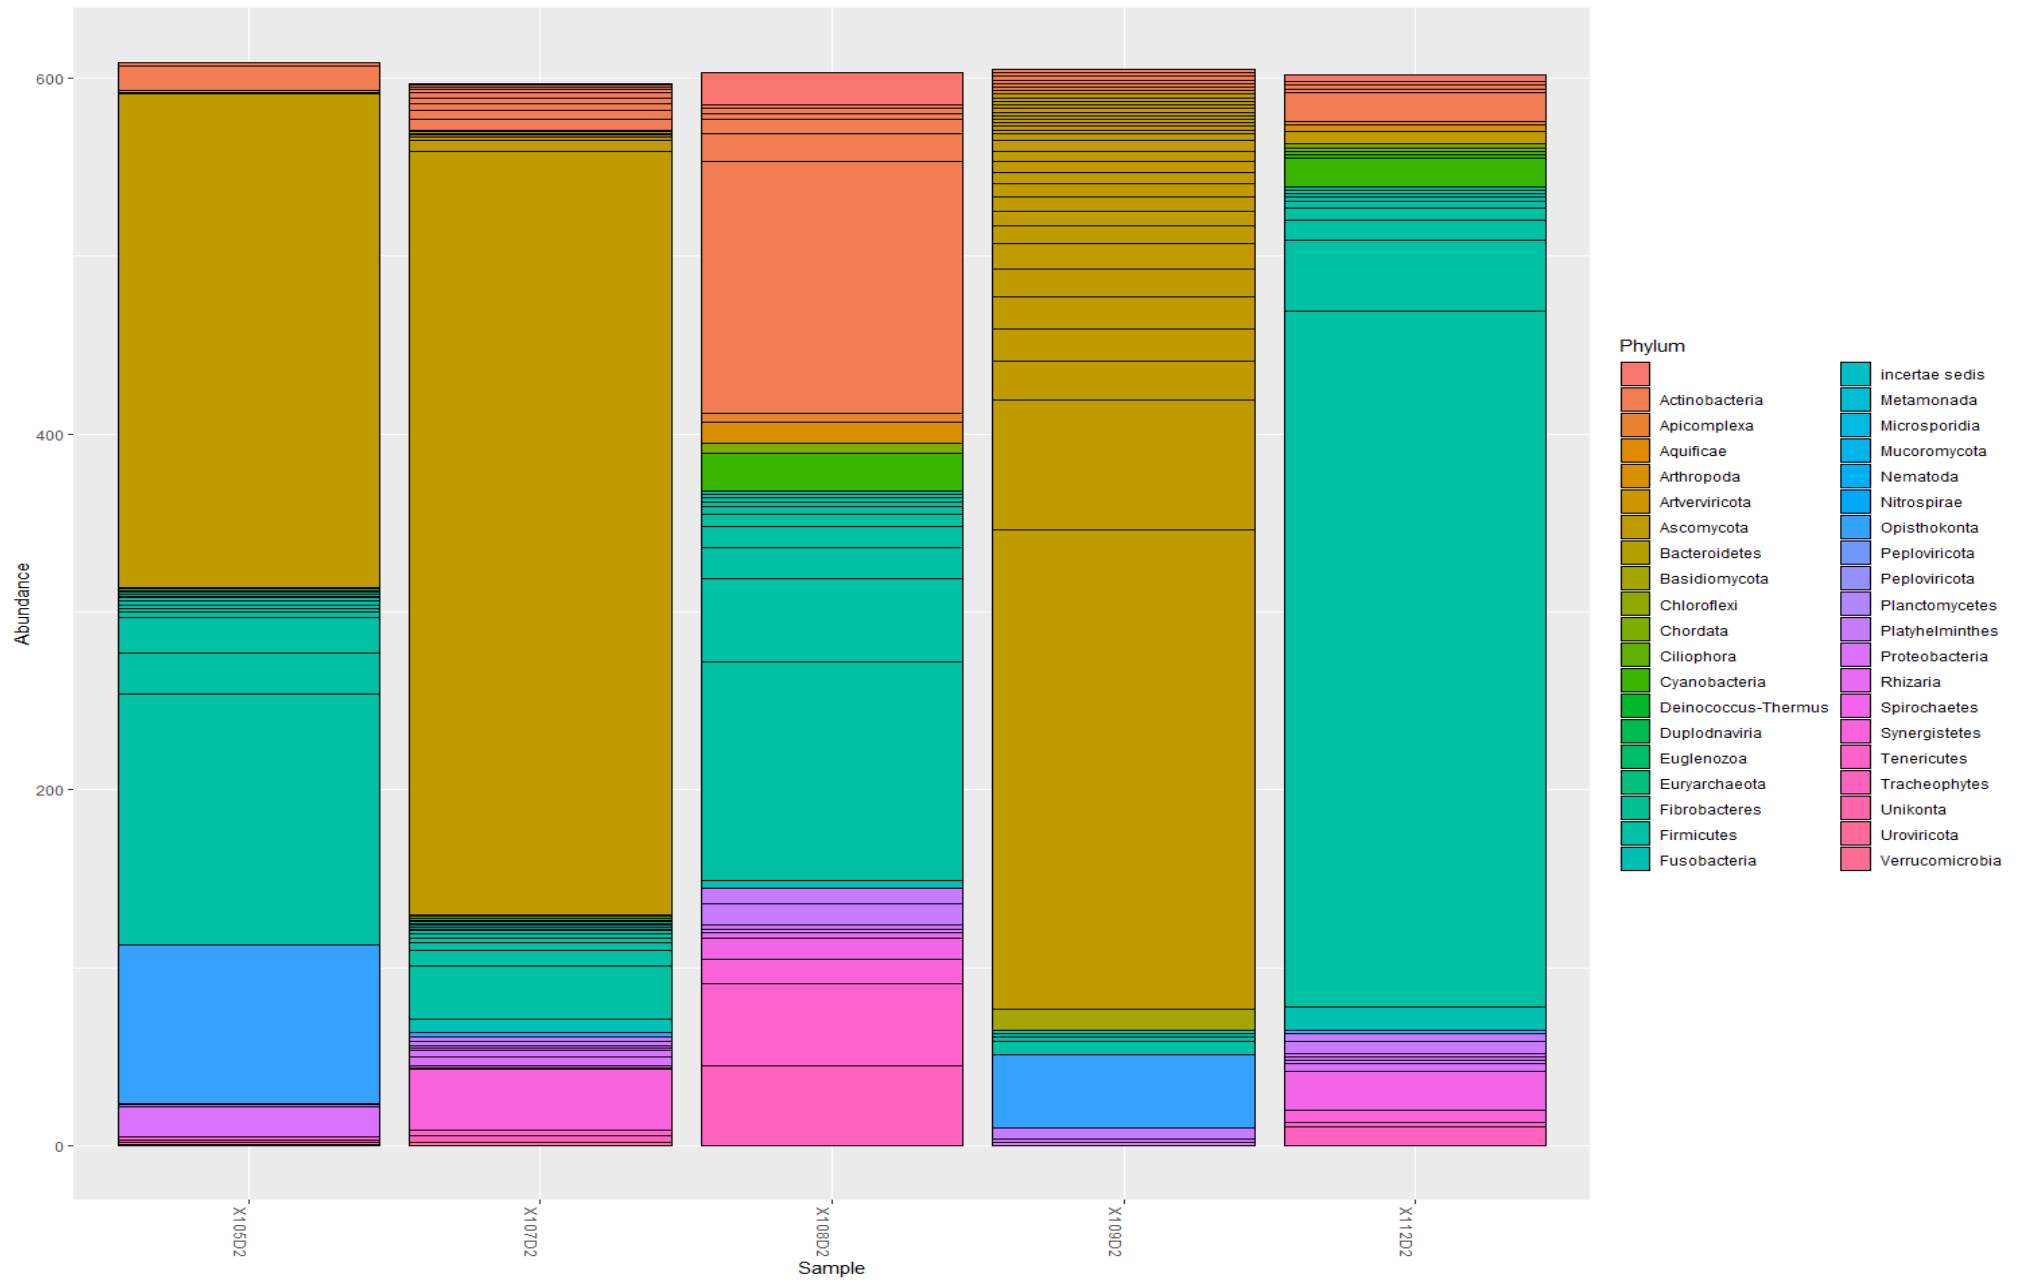

Figure xx. Abundance of microbial Phyla in day 2 sputum samples.

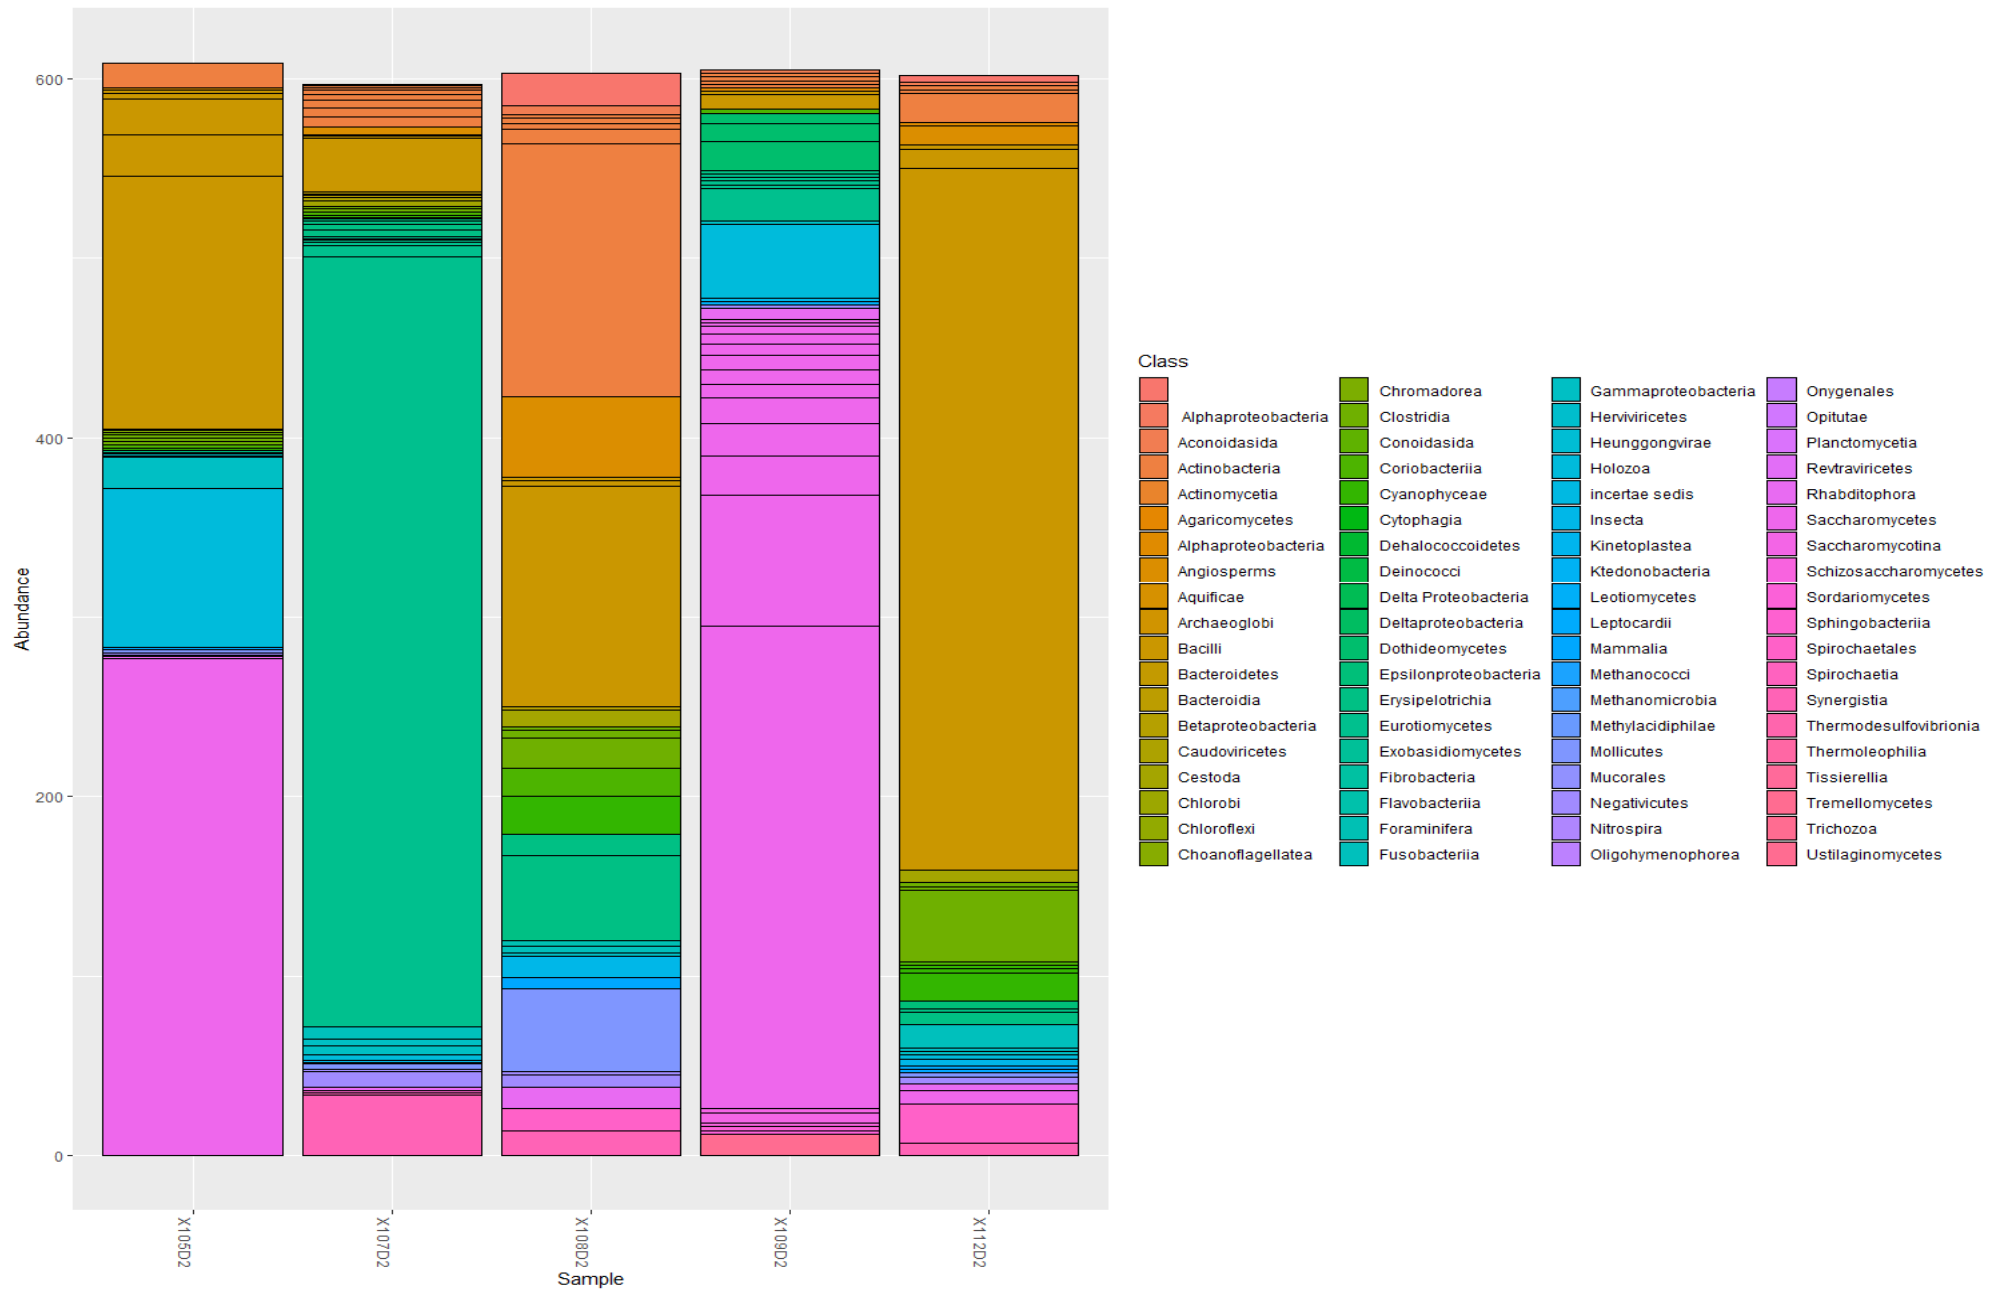

Figure xxi. Abundance of microbial classes in day 2 sputum samples.

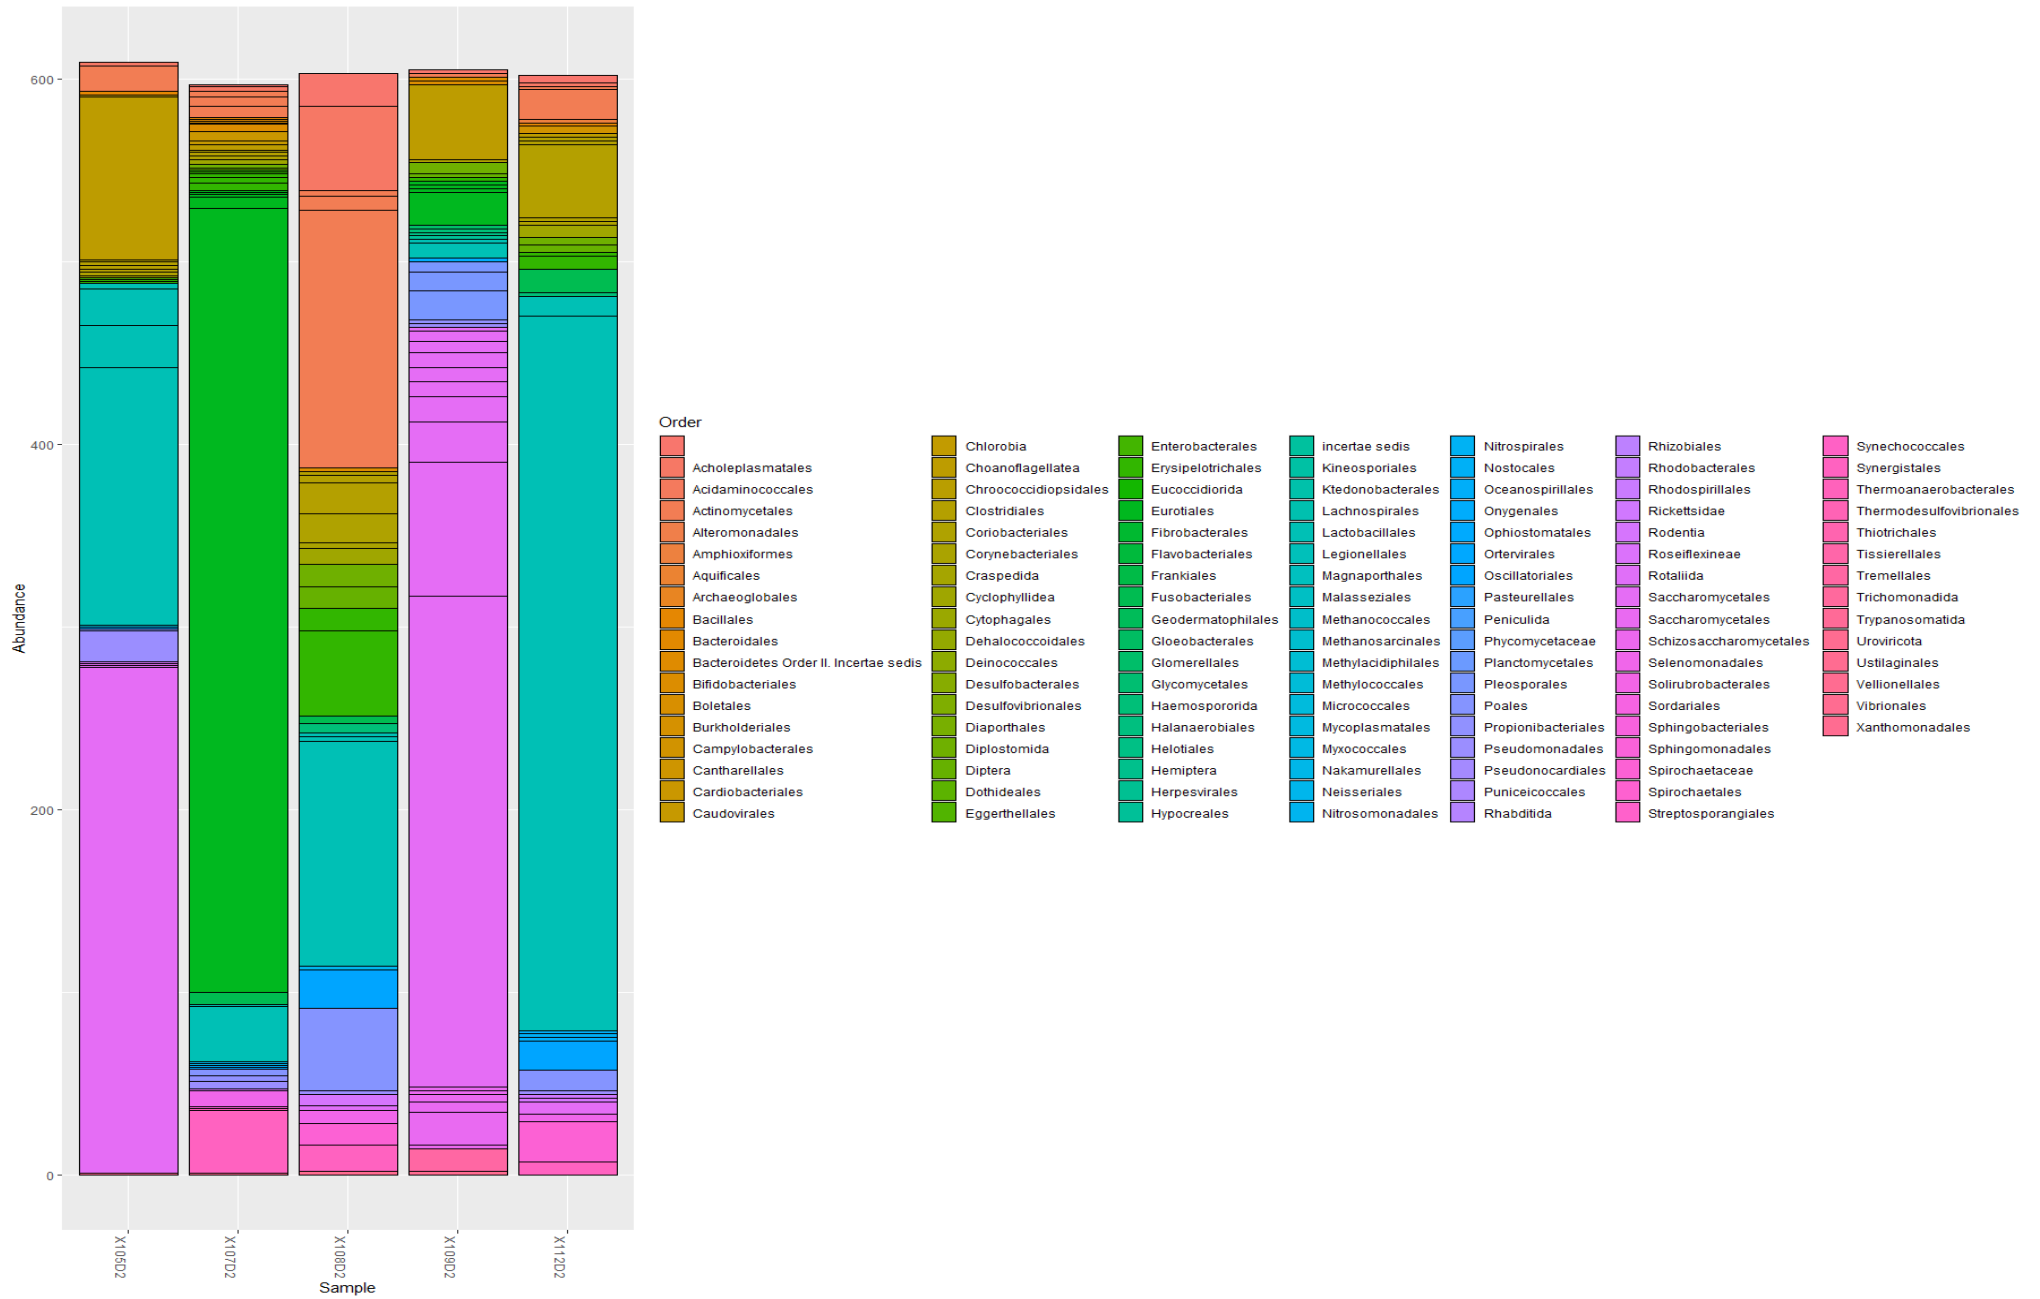

**Figure xxii. Abundance of microbial order in day 2 sputum samples.**

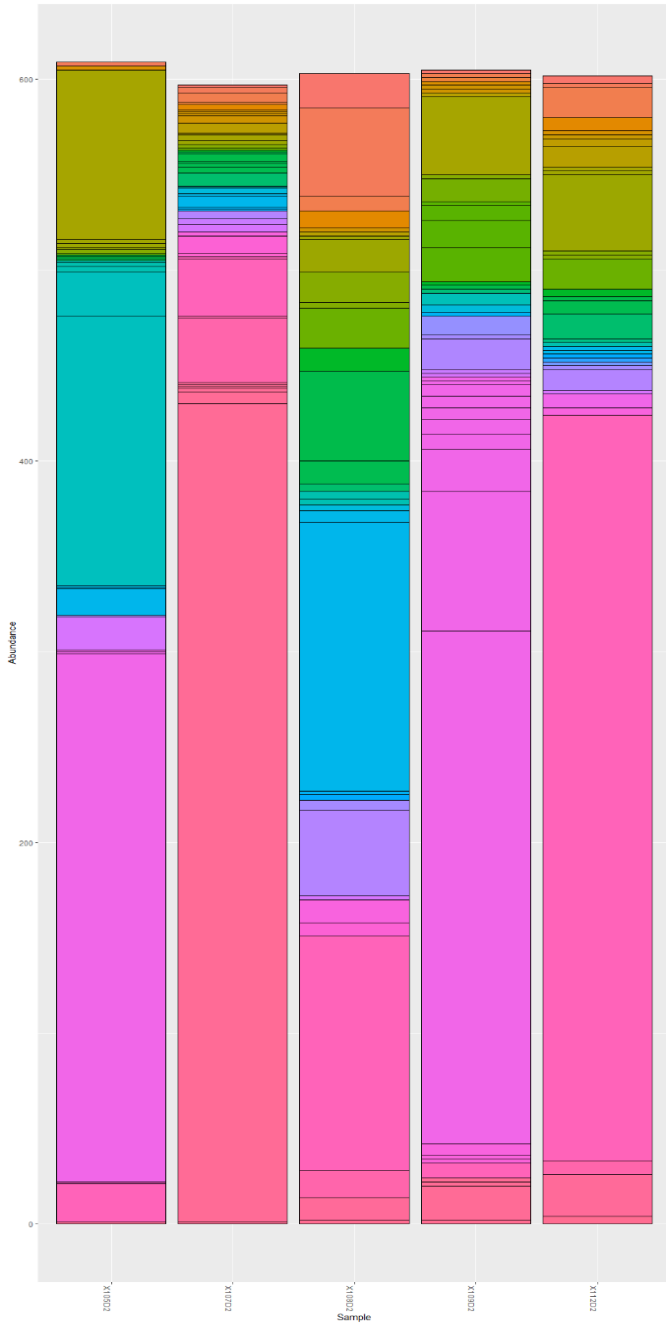

| Family                 |                     |                                        |                         |                       |                     |                      |                       |                                 |                           |                   |
|------------------------|---------------------|----------------------------------------|-------------------------|-----------------------|---------------------|----------------------|-----------------------|---------------------------------|---------------------------|-------------------|
| Enteroclostridiidae    | Aspergillaceae      | Chlorobacteraceae                      | Dinhalococcoidia        | Fusobacteriaceae      | Legionellaceae      | Mycobacteriaceae     | Pasturellaceae        | Pseudobacteroidaceae            | Sagittariaceae            | Tischneriaceae    |
| Acaryochloridaceae     | Aureimonadaceae     | Chloroflexellales                      | Deinococcaceae          | Geodermatophilaceae   | Leptospirillaceae   | Nitrospirillaceae    | Pectobacteriaceae     | Pseudococcaceae                 | Selenomonadaceae          | Tischneromastix   |
| Acholeplasmataceae     | Bacillaceae         | Clostridiales Family XI Incertae Sedis | Dermatobacteriaceae     | Gloeobacteriaceae     | Leuconostocaceae    | Nitrospiroplasmaceae | Peptobacteriales      | Pseudomonadaceae                | Shewanellaceae            | Typanosomatidae   |
| Acidimicrobiaceae      | Beutenbergiaceae    | Codonomonadaceae                       | Desulfotomobacteriaceae | Gomphonellaceae       | Listeriaceae        | Nitrospiraceae       | Peptoniphilaceae      | Pseudonocardaceae               | Siphonolaceae             | Turkibacteriaceae |
| Actinomyces            | Bifidobacteriaceae  | Comamonadaceae                         | Dietziaceae             | Gordoniaceae          | Magnaporthaceae     | Nitrosomonadaceae    | Peptoniphilus         | Punicococcaceae                 | Springobacteriaceae       | Ustilaginaceae    |
| Actinosynnemataceae    | Bifidobacteriaceae  | Comamonadaceae                         | Dipodascaceae           | Halanaerobacteriaceae | Malaissiacaceae     | Nitrospiroplasmaceae | Phaeosphaeriaceae     | Rhodococcaceae                  | Springomonadaceae         | Vibrionellaceae   |
| Aerococcaceae          | Bradyrhizobiaceae   | Comamonadaceae                         | Droserophilidae         | Halomonadaceae        | Methanococcaceae    | Nocardiaceae         | Phrymomyces           | Rhodobacteriaceae               | Sporosinusaceae           | Xanthomonadaceae  |
| Aleellomyces           | Brevibacteriaceae   | Coriobacteriaceae                      | Eggerthellaceae         | Helicobacteriaceae    | Methanorhizobiaceae | Nocardiothraupaceae  | Planctomycetaceae     | Rhodospirillales incertae sedis | Staphylococcaceae         | Yersiniaceae      |
| Alcaligenaceae         | Brucellaceae        | Coriobacteriaceae                      | Enterobacteriaceae      | Herpesoviridae        | Methylobacteriaceae | Nonionidae           | Plasmodiidae          | Rhodothermaceae                 | Staphylococcaceae         |                   |
| Allycyclobacteriaceae  | Burkholderiaceae    | Corynebacteriaceae                     | Enterococcaceae         | Herpesoviridae        | Methylobacteriaceae | Nostocaceae          | Plectosphaerellaceae  | Rhodothermaceae                 | Streptococcaceae          |                   |
| Alteromonadaceae       | Campylobacteriaceae | Corynebacteriaceae                     | Eristaceae              | Microsporangiaceae    | Methylobacteriaceae | Oscillatoriales      | Pectiniporaceae       | Ruminococcaceae                 | Streptomyces              |                   |
| Anaeromyxobacteriaceae | Caritburteriaceae   | Cyphomonadaceae                        | Erythrobacteriaceae     | Myxococcaceae         | Methylobacteriaceae | Oxycoccoidae         | Proteaceae            | Saccharomyces                   | Streptomyces              |                   |
| Aneliovividae          | Cardiobacteriaceae  | Cryptococcaceae                        | Erythrobacteriaceae     | Myxococcaceae         | Methylobacteriaceae | Onygenaceae          | Pedovividae           | Saccobacteriaceae               | Smergillaceae             |                   |
| Anoplocephalidae       | Carobacteriaceae    | Cryptosporidiidae                      | Erythrobacteriaceae     | Myxococcaceae         | Methylobacteriaceae | Oxycoccoidae         | Porphyromonadaceae    | Sanguibacteriaceae              | Thermoaerobacteriaceae    |                   |
| Aphanizomenonaceae     | Caulimicrobiaceae   | Cyanoflexellales                       | Eubacteriaceae          | Klebsiellaceae        | Micromonosporaceae  | Oxylotomataceae      | Prevotellaceae        | Sarcocystidae                   | Thermodesulfobacteriaceae |                   |
| Aquificaceae           | Cellulomonadaceae   | Cyctobacteriaceae                      | Eubacteriaceae          | Kyloccaceae           | Moraxellaceae       | Oxylotomataceae      | Prevotellaceae        | Schistosomatidae                | Thiobacillaceae           |                   |
| Archaeoglobaceae       | Chloroflexellales   | Cyphomonadaceae                        | Eubacteriaceae          | Planctomycetaceae     | Morganellaceae      | Parabacteriaceae     | Prophionibacteriaceae | Schistosachromyces              | Thiodiaphaceae            |                   |
| Archaeomicrobiaceae    | Chloroflexellales   | DeBarymycetaceae                       | Frankiaceae             | Planctomycetaceae     | Lactobacteriaceae   | Parameciidae         | Propionibacteriales   | Sclerotiniaceae                 | Trichonema                |                   |

Figure xxiii. Abundance of microbial families in day 2 sputum samples.





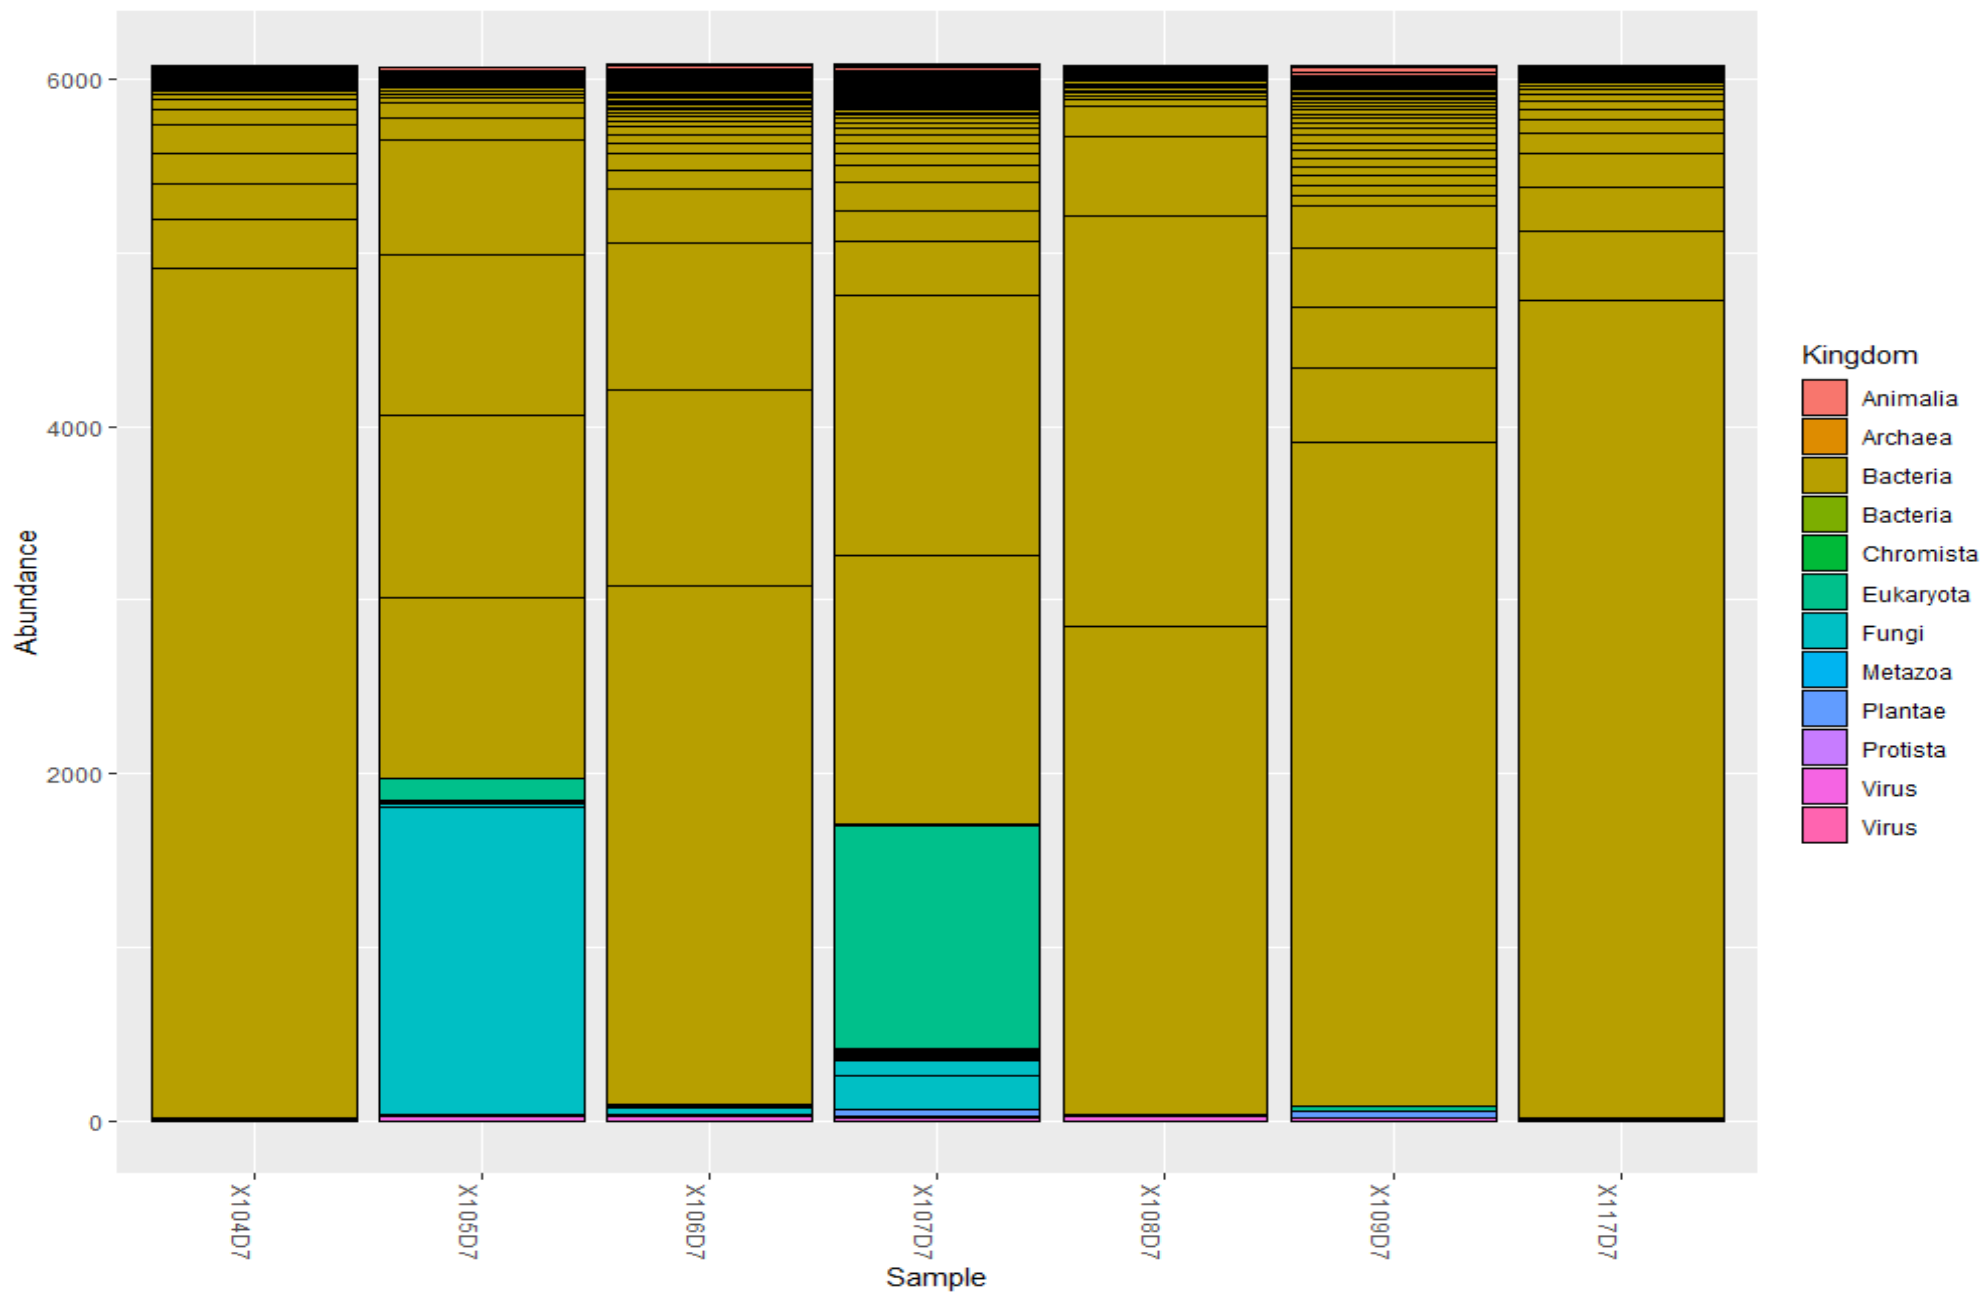

Figure xxv. Abundance of microbial kingdom in day 7 sputum samples.

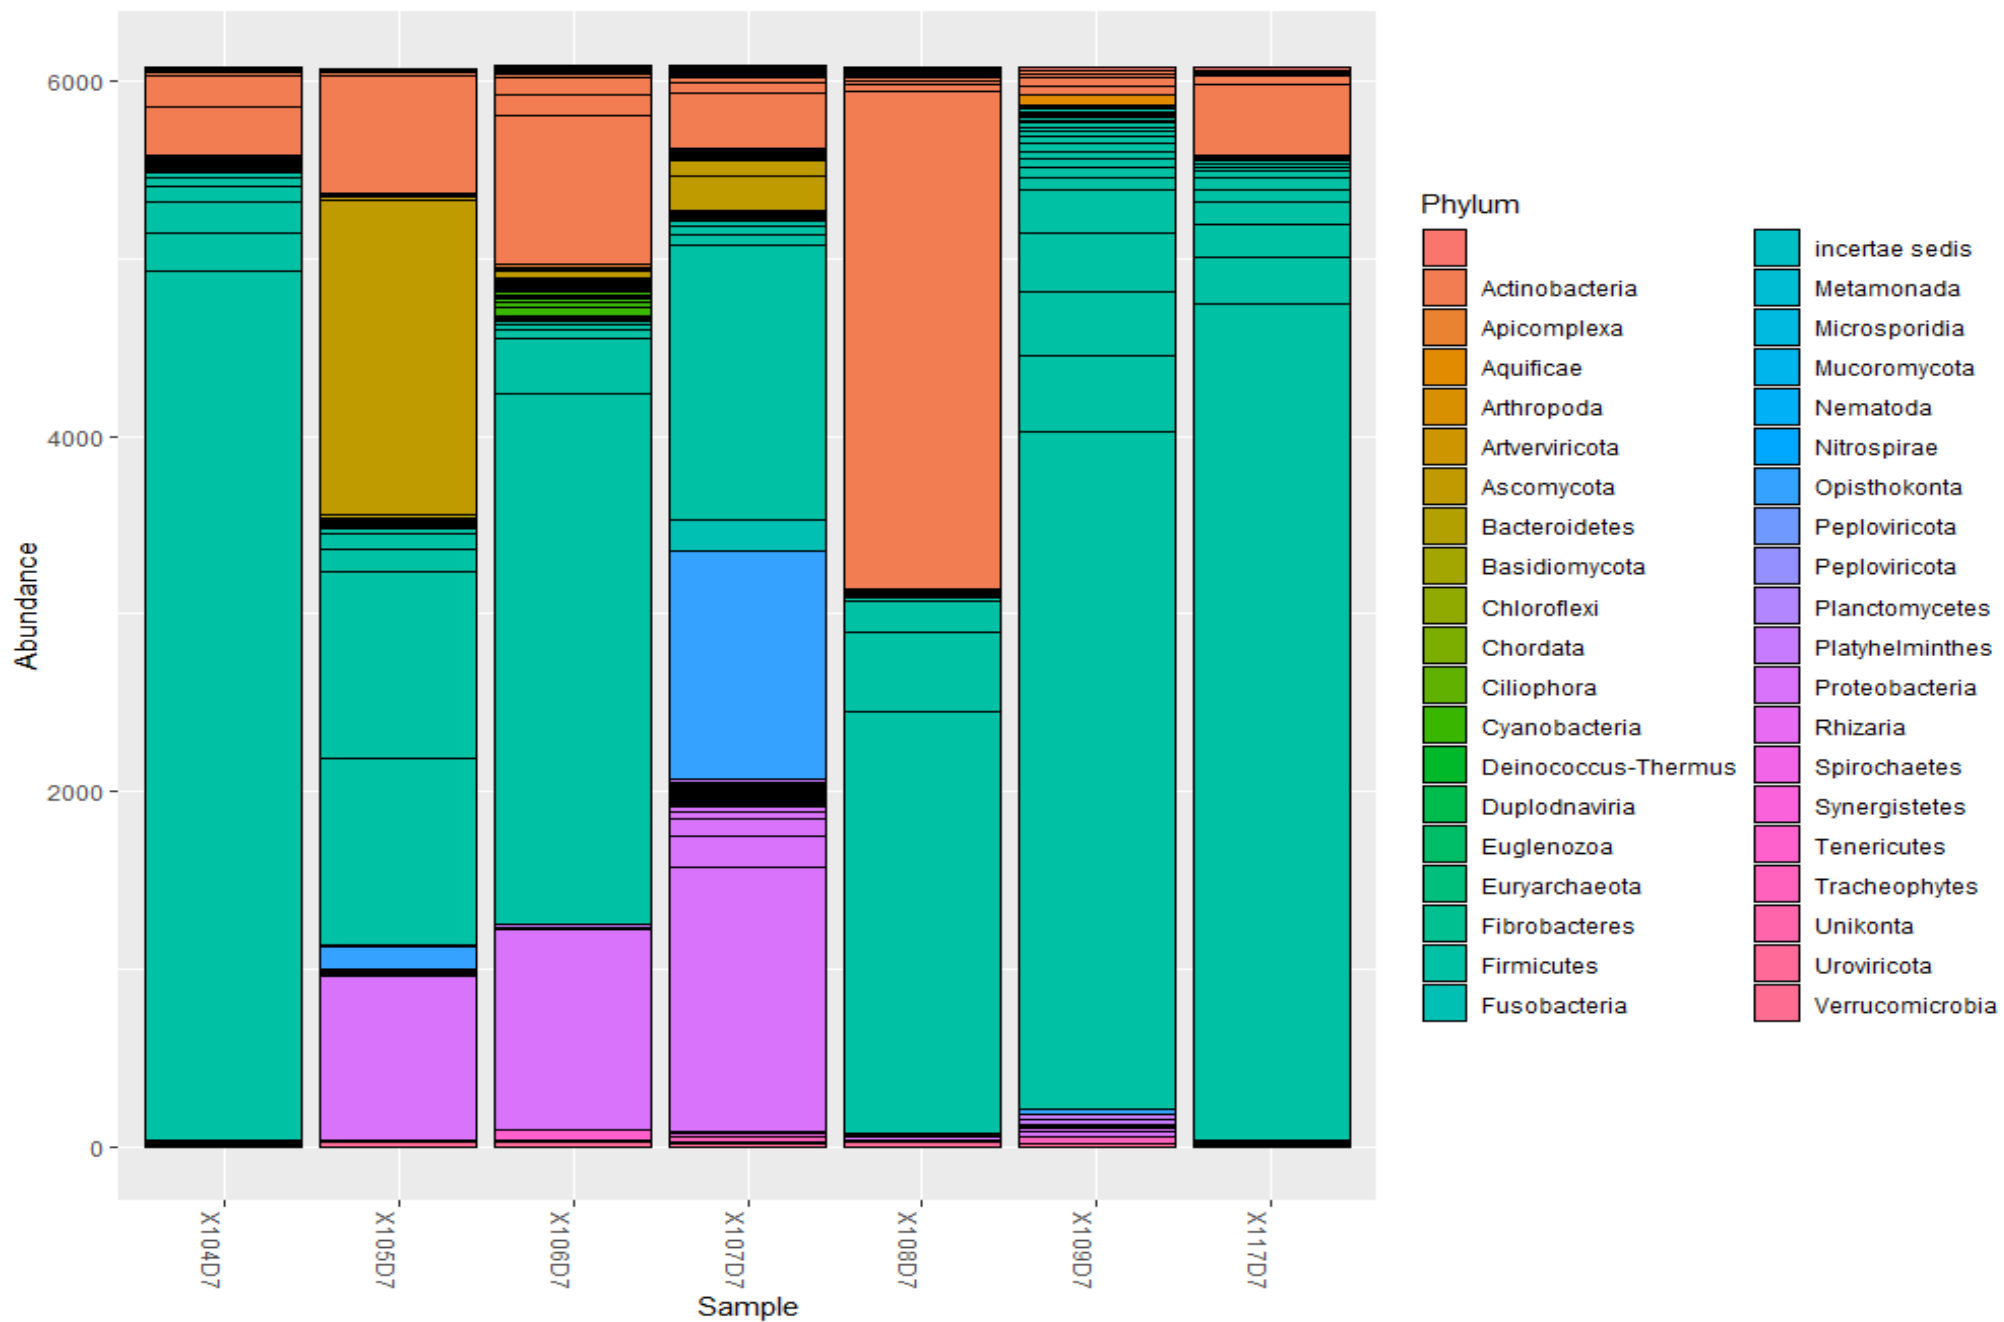

Figure xxvi. Abundance of microbial phyla in day 7 sputum samples.

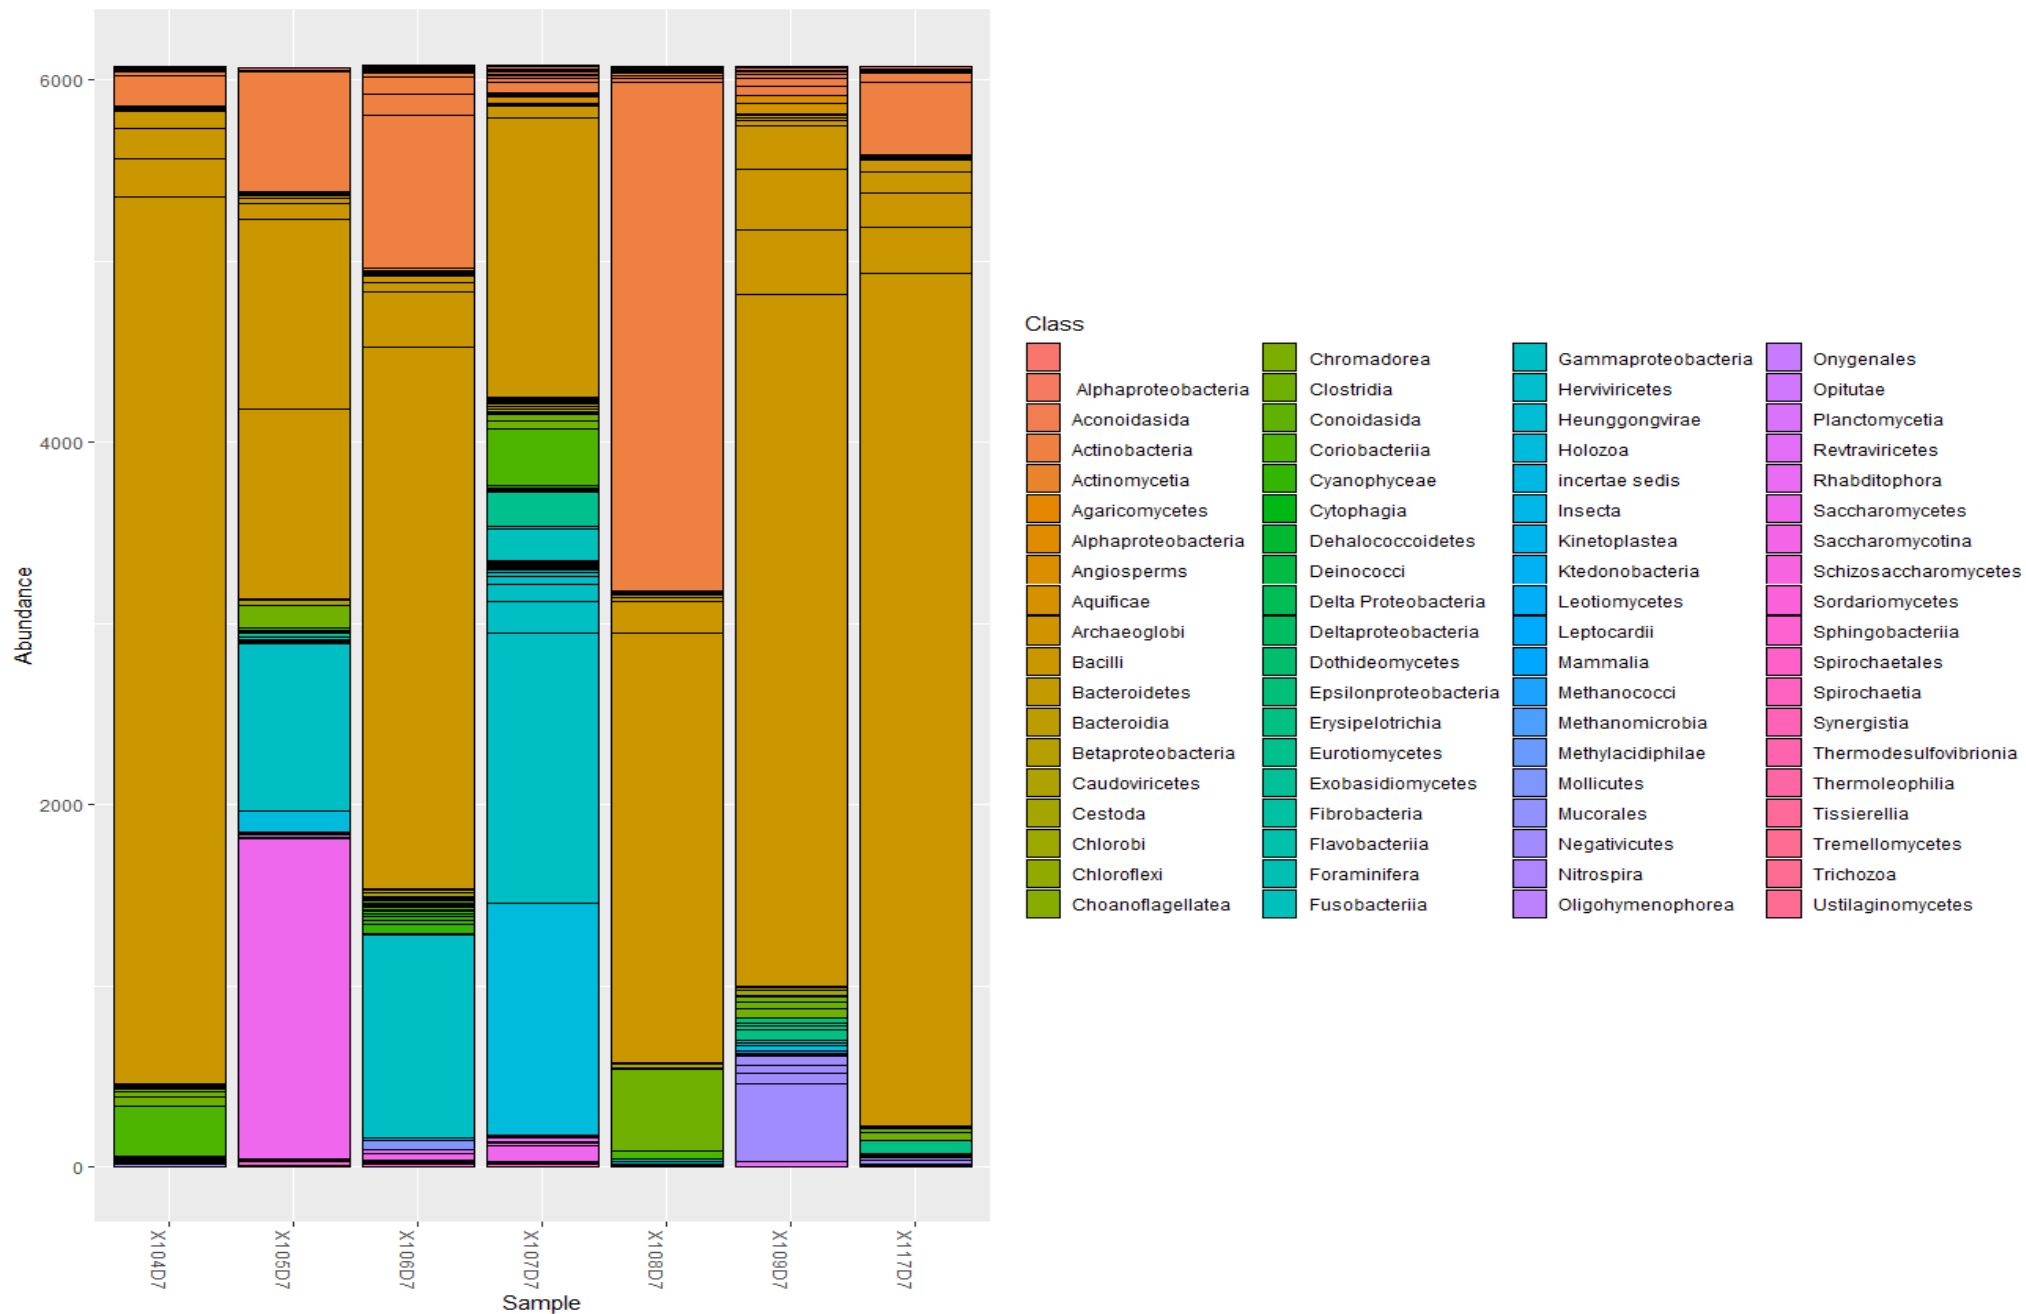

Figure xxvii. Abundance of microbial classes in day 7 sputum samples.

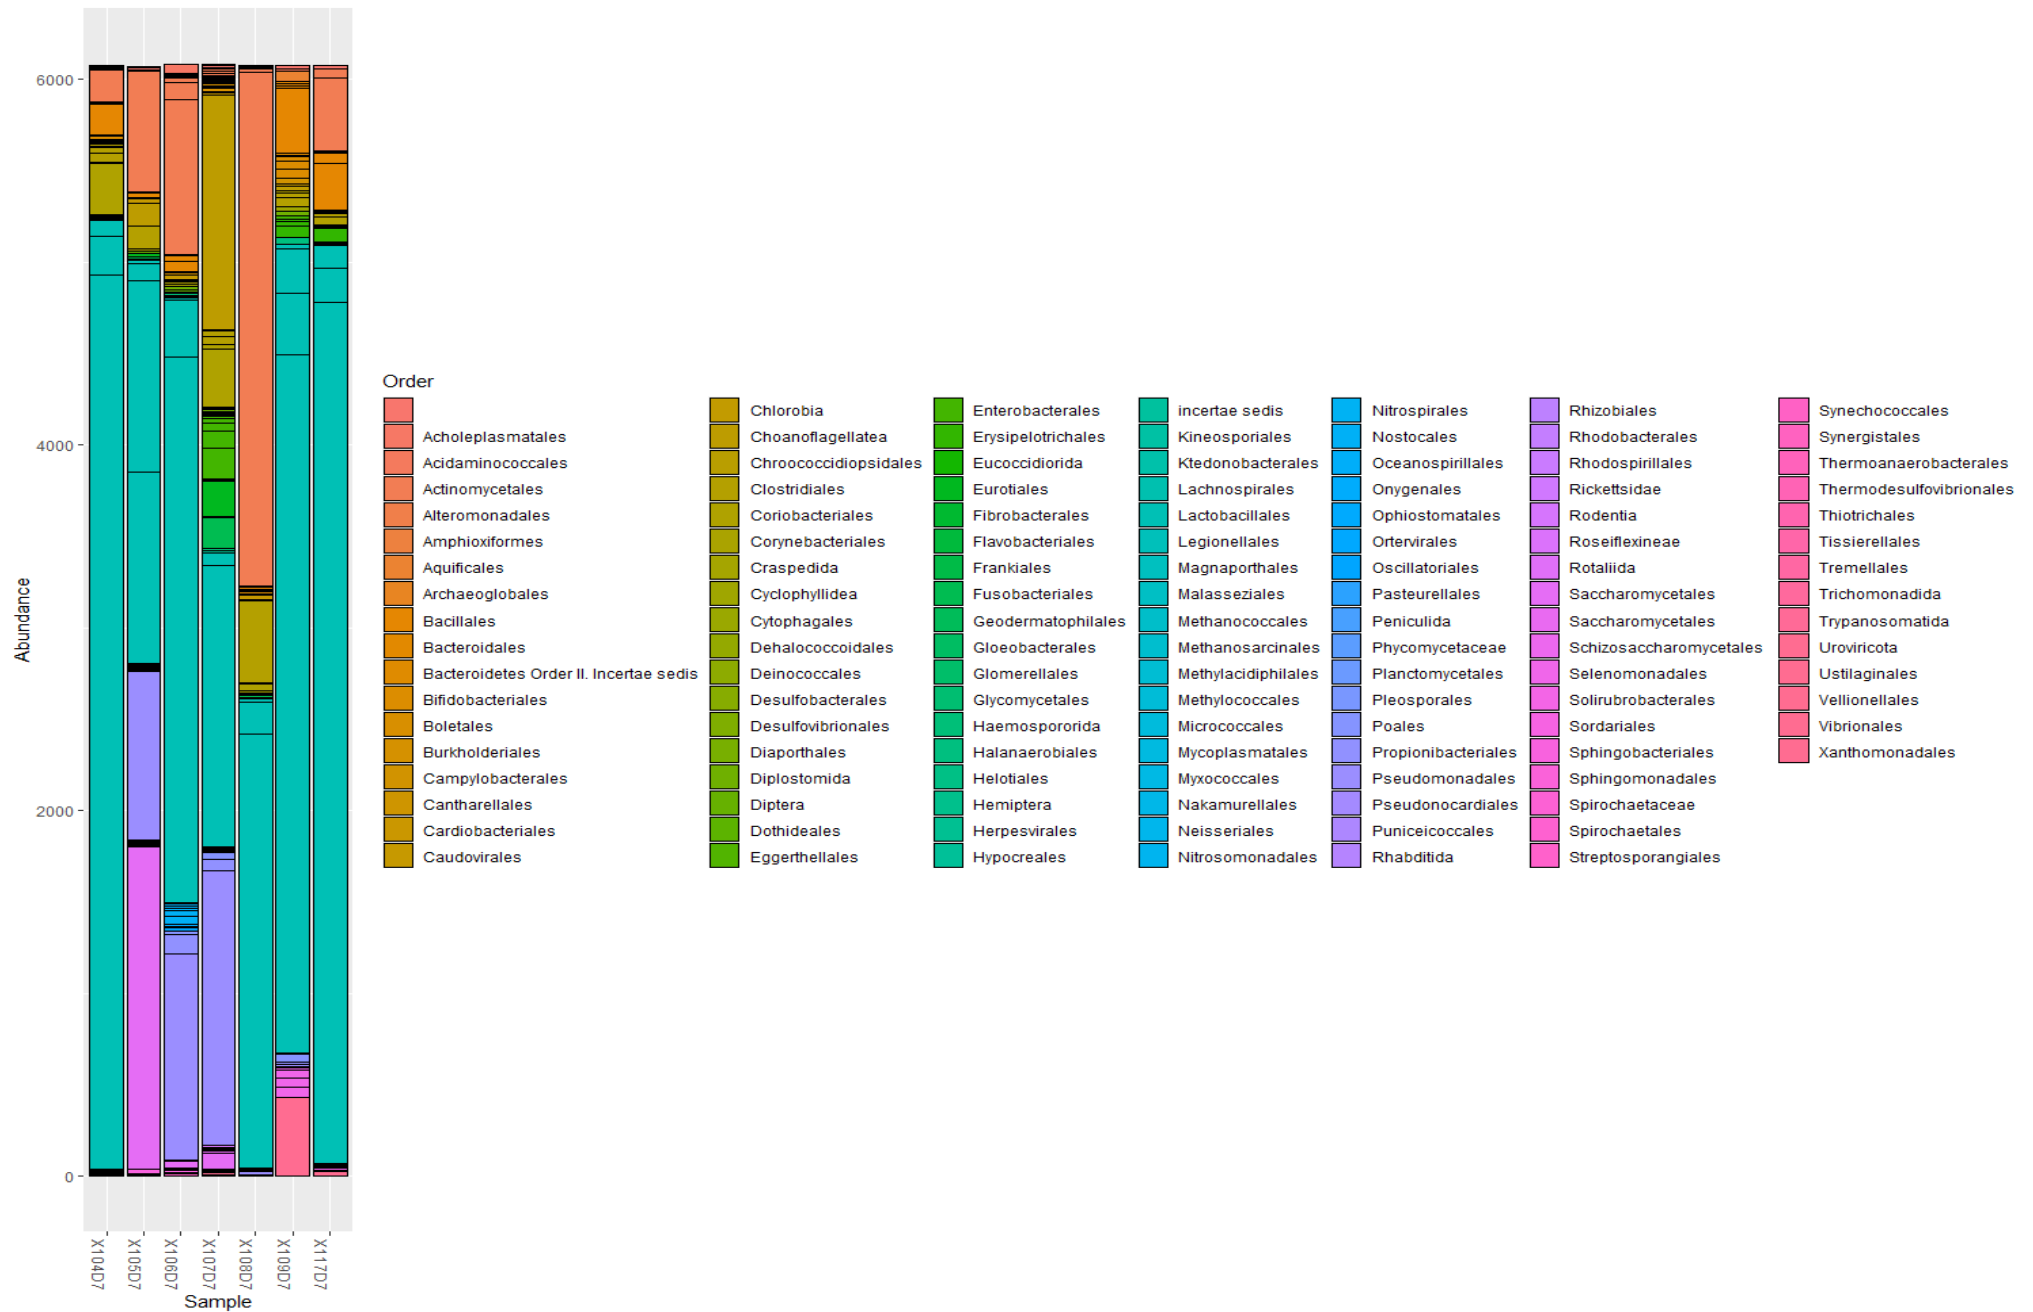

Figure xxviii. Abundance of microbial orders in day 7 sputum samples.

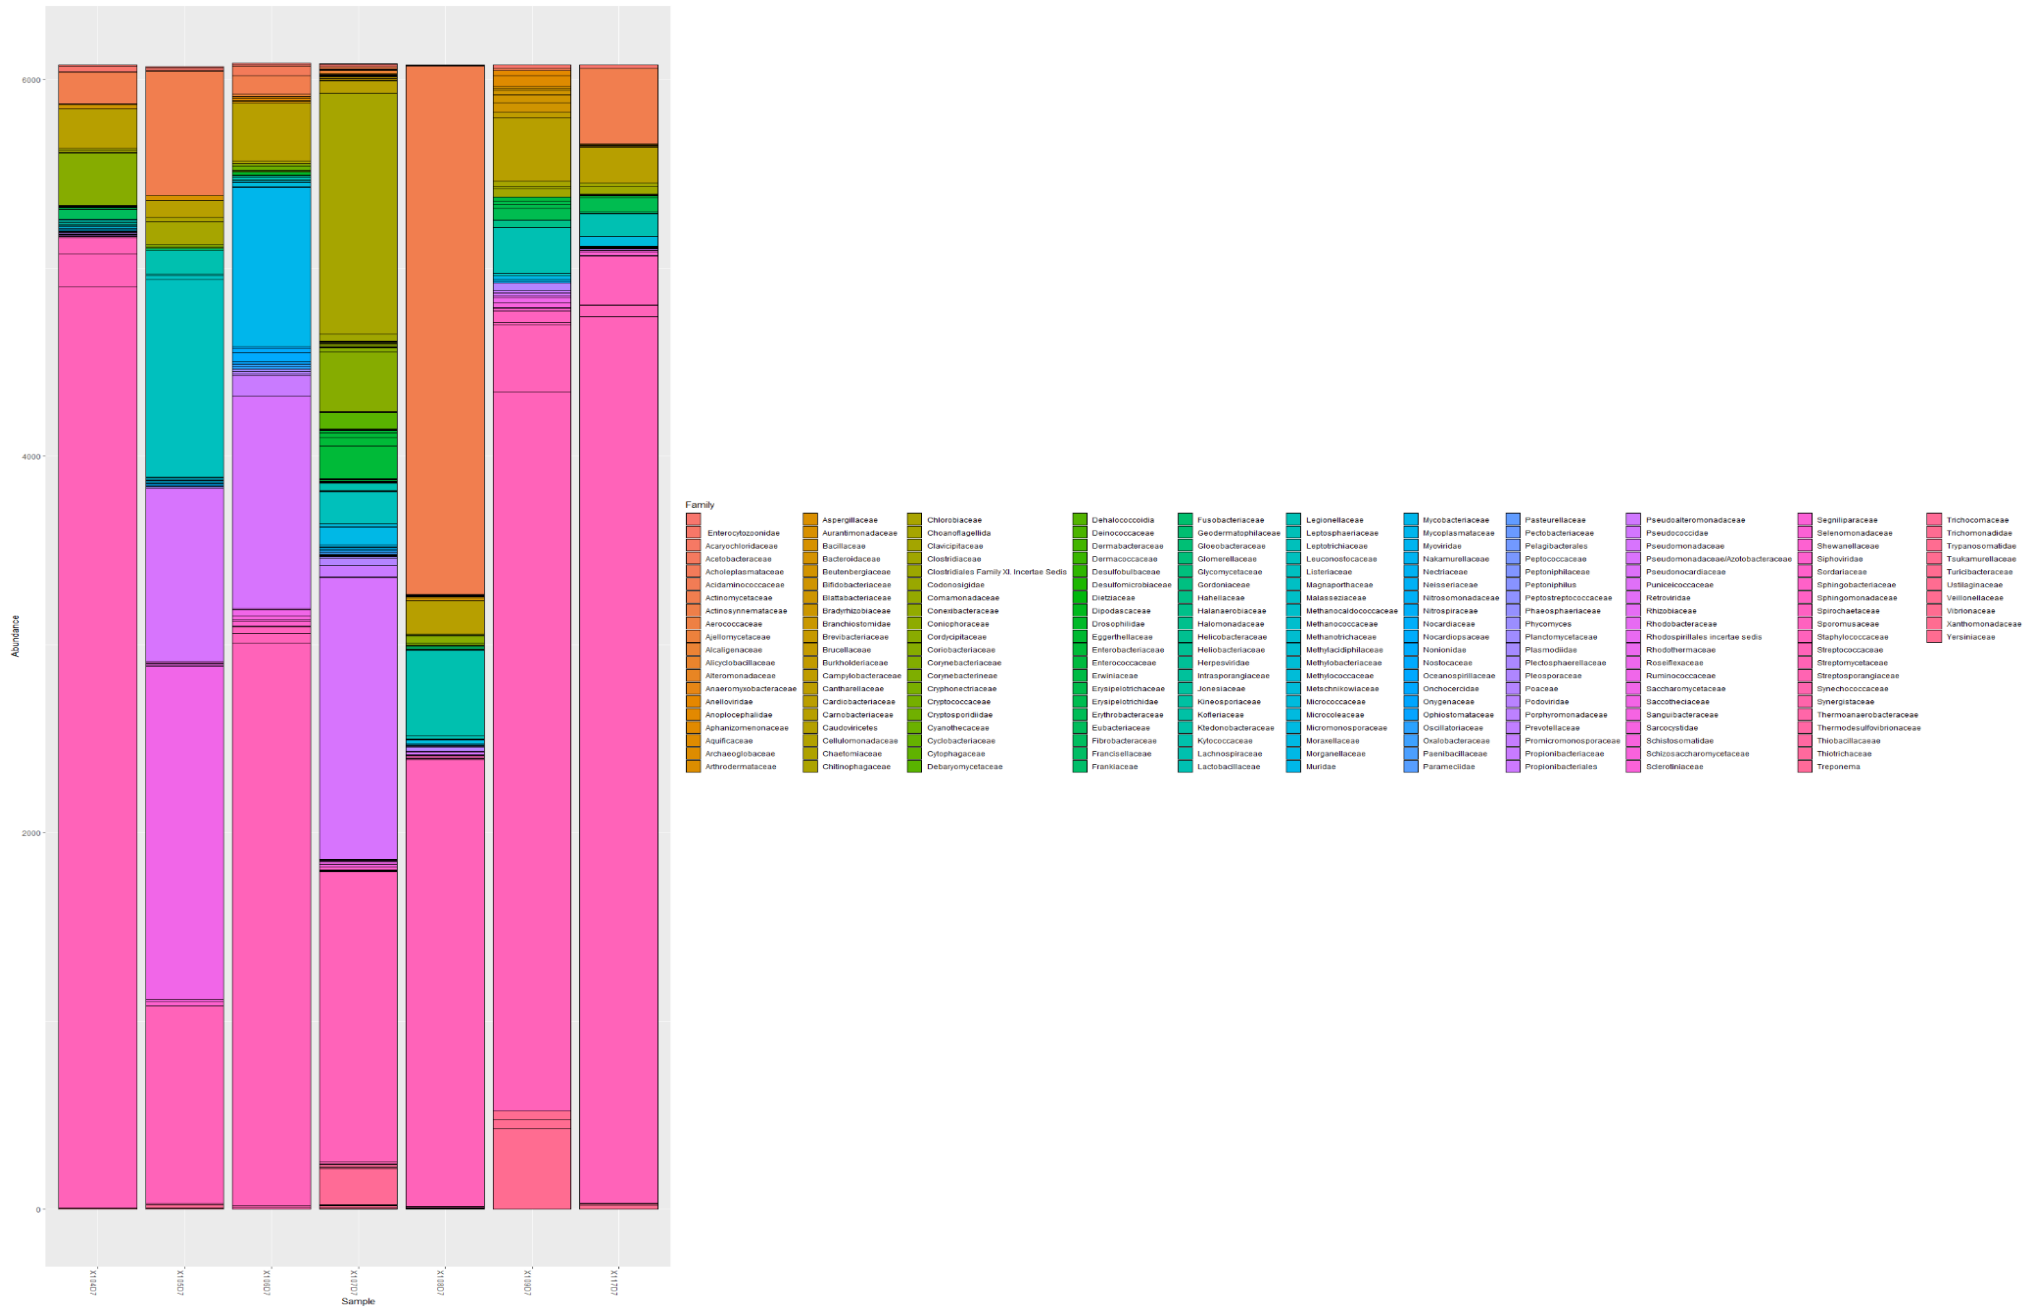

Figure xxix. Abundance of microbial families in day 7 sputum samples.
