# Supplementary material for: An Oxford Nanopore-based Characterisation of Sputum Microbiota Dysbiosis in Patients with Tuberculosis: from baseline to 7 days after Antibiotic Treatment
Source: bioRxiv or medRxiv preprint supplement (doi:10.1101/2021.06.24.21259332), 2021-06-29
Supplement: Supplementary file [file media-5.pdf]

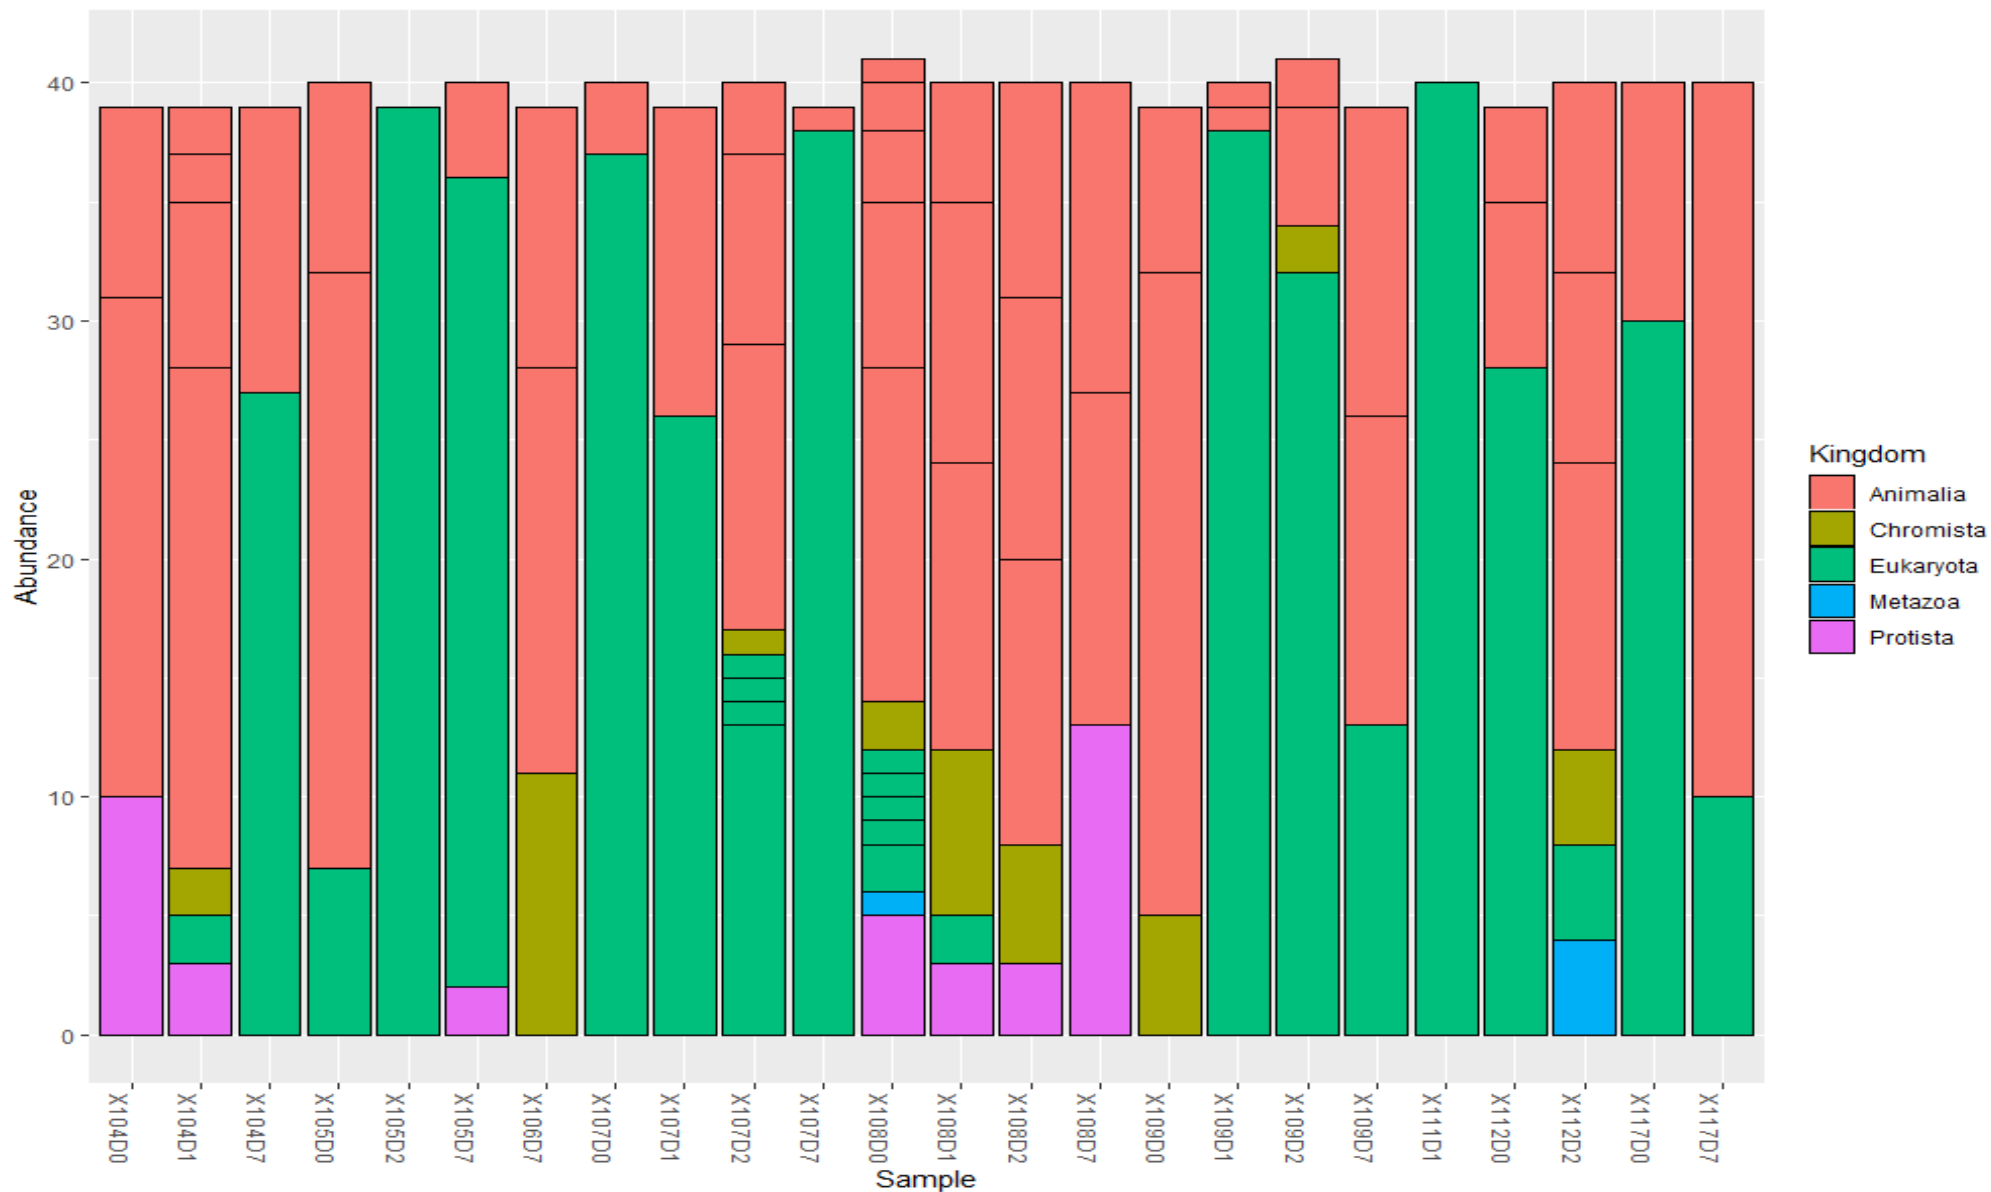

**Figure i. Abundance of Kingdom types that are parasites in the samples.** The Kingdom types that fall under parasites included Animalia, Chromista, Eukaryota, Metazoa, and Protista, which did not follow a consistent pattern suggestive of an antibiotic-mediated dysbiosis. Kingdom and Animalia were the most common, followed by Protista; Metazoa was least.

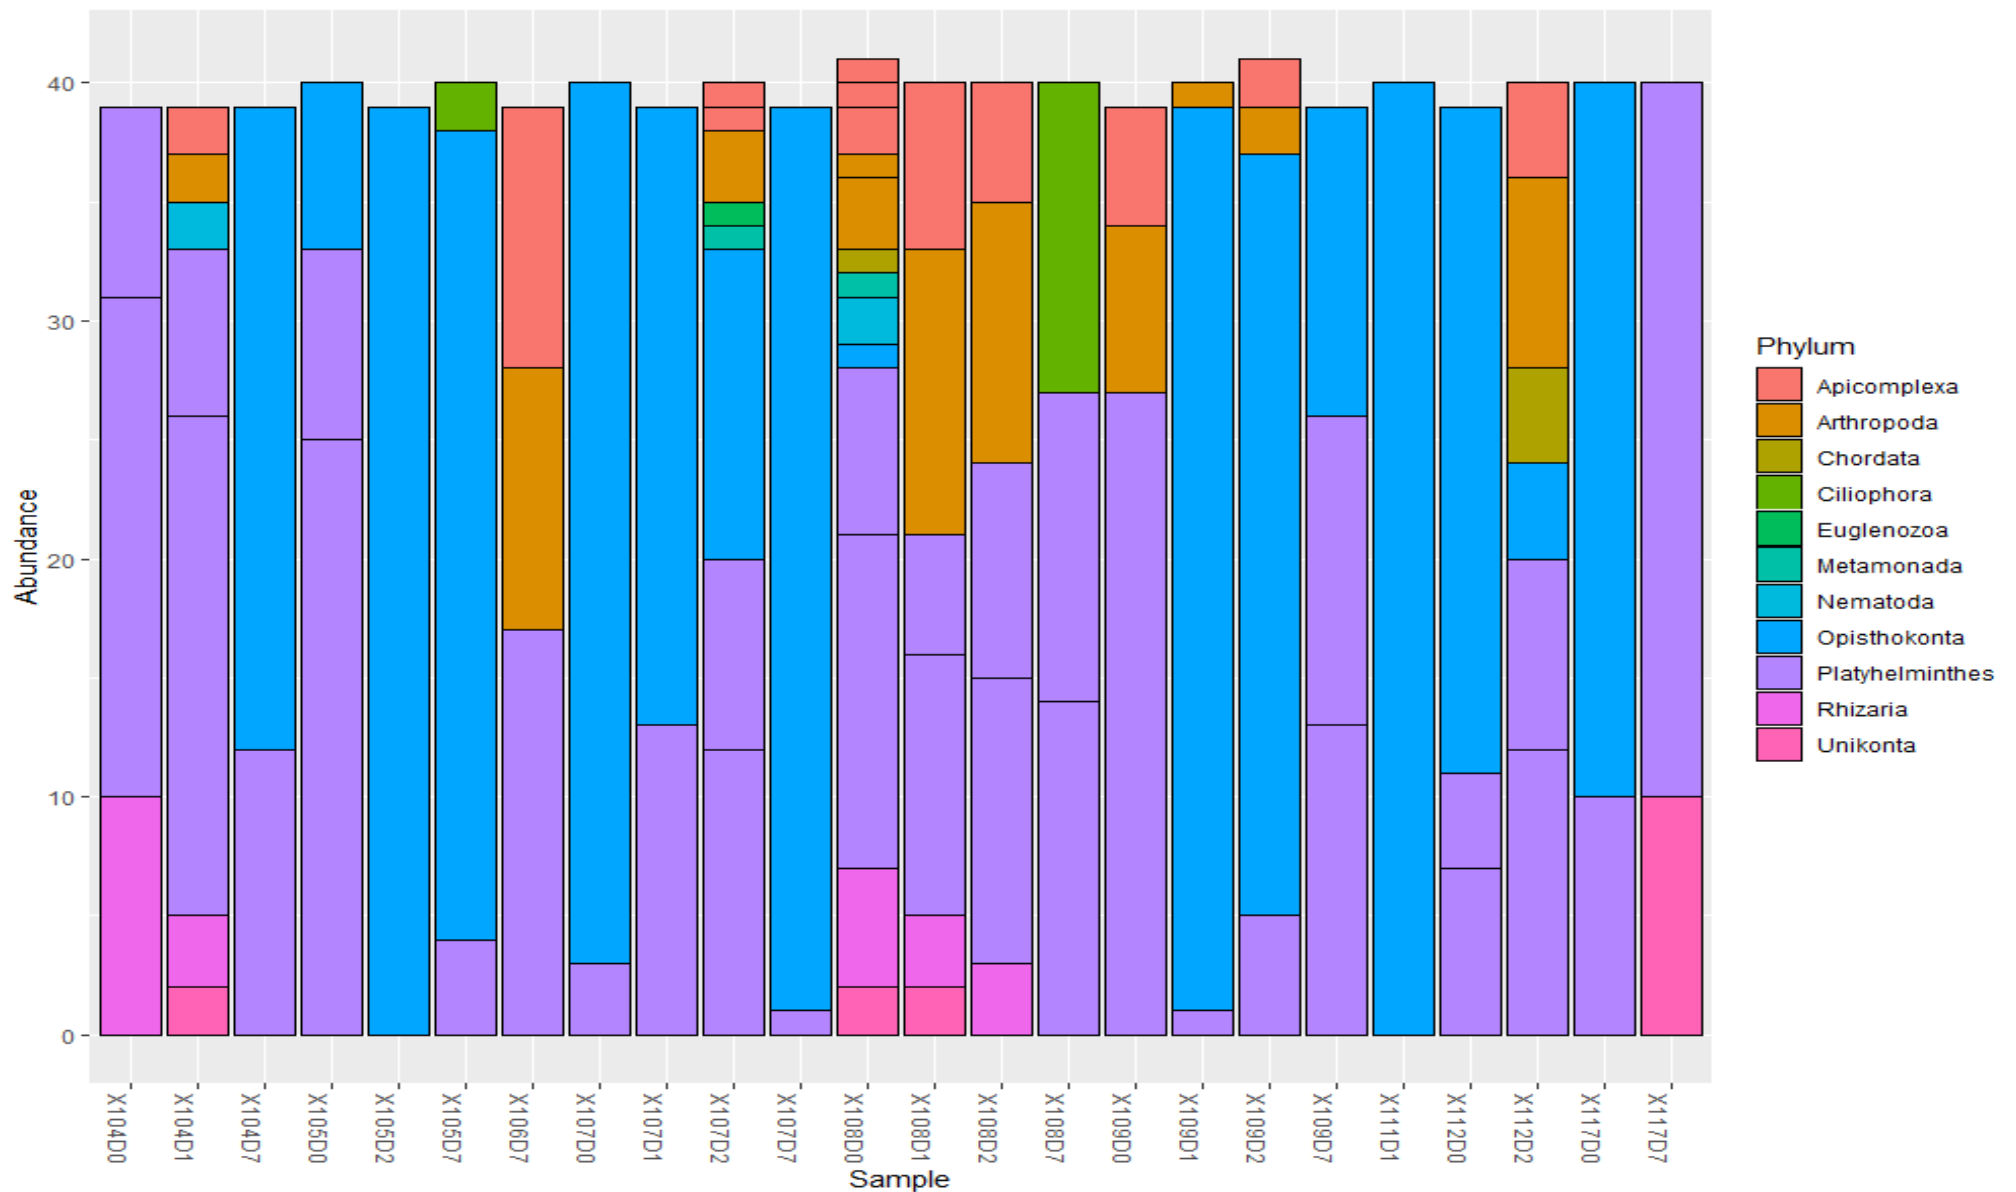

**Figure ii. Abundance of various Phyla that are parasites.** Platyhelminthes and Opisthokonta were the most common parasites in the samples. The abundance levels of the various parasites per sample does not suggest antibiotic-mediated changes in these parasites as they could increase or decrease over the duration of the antibiotic therapy.

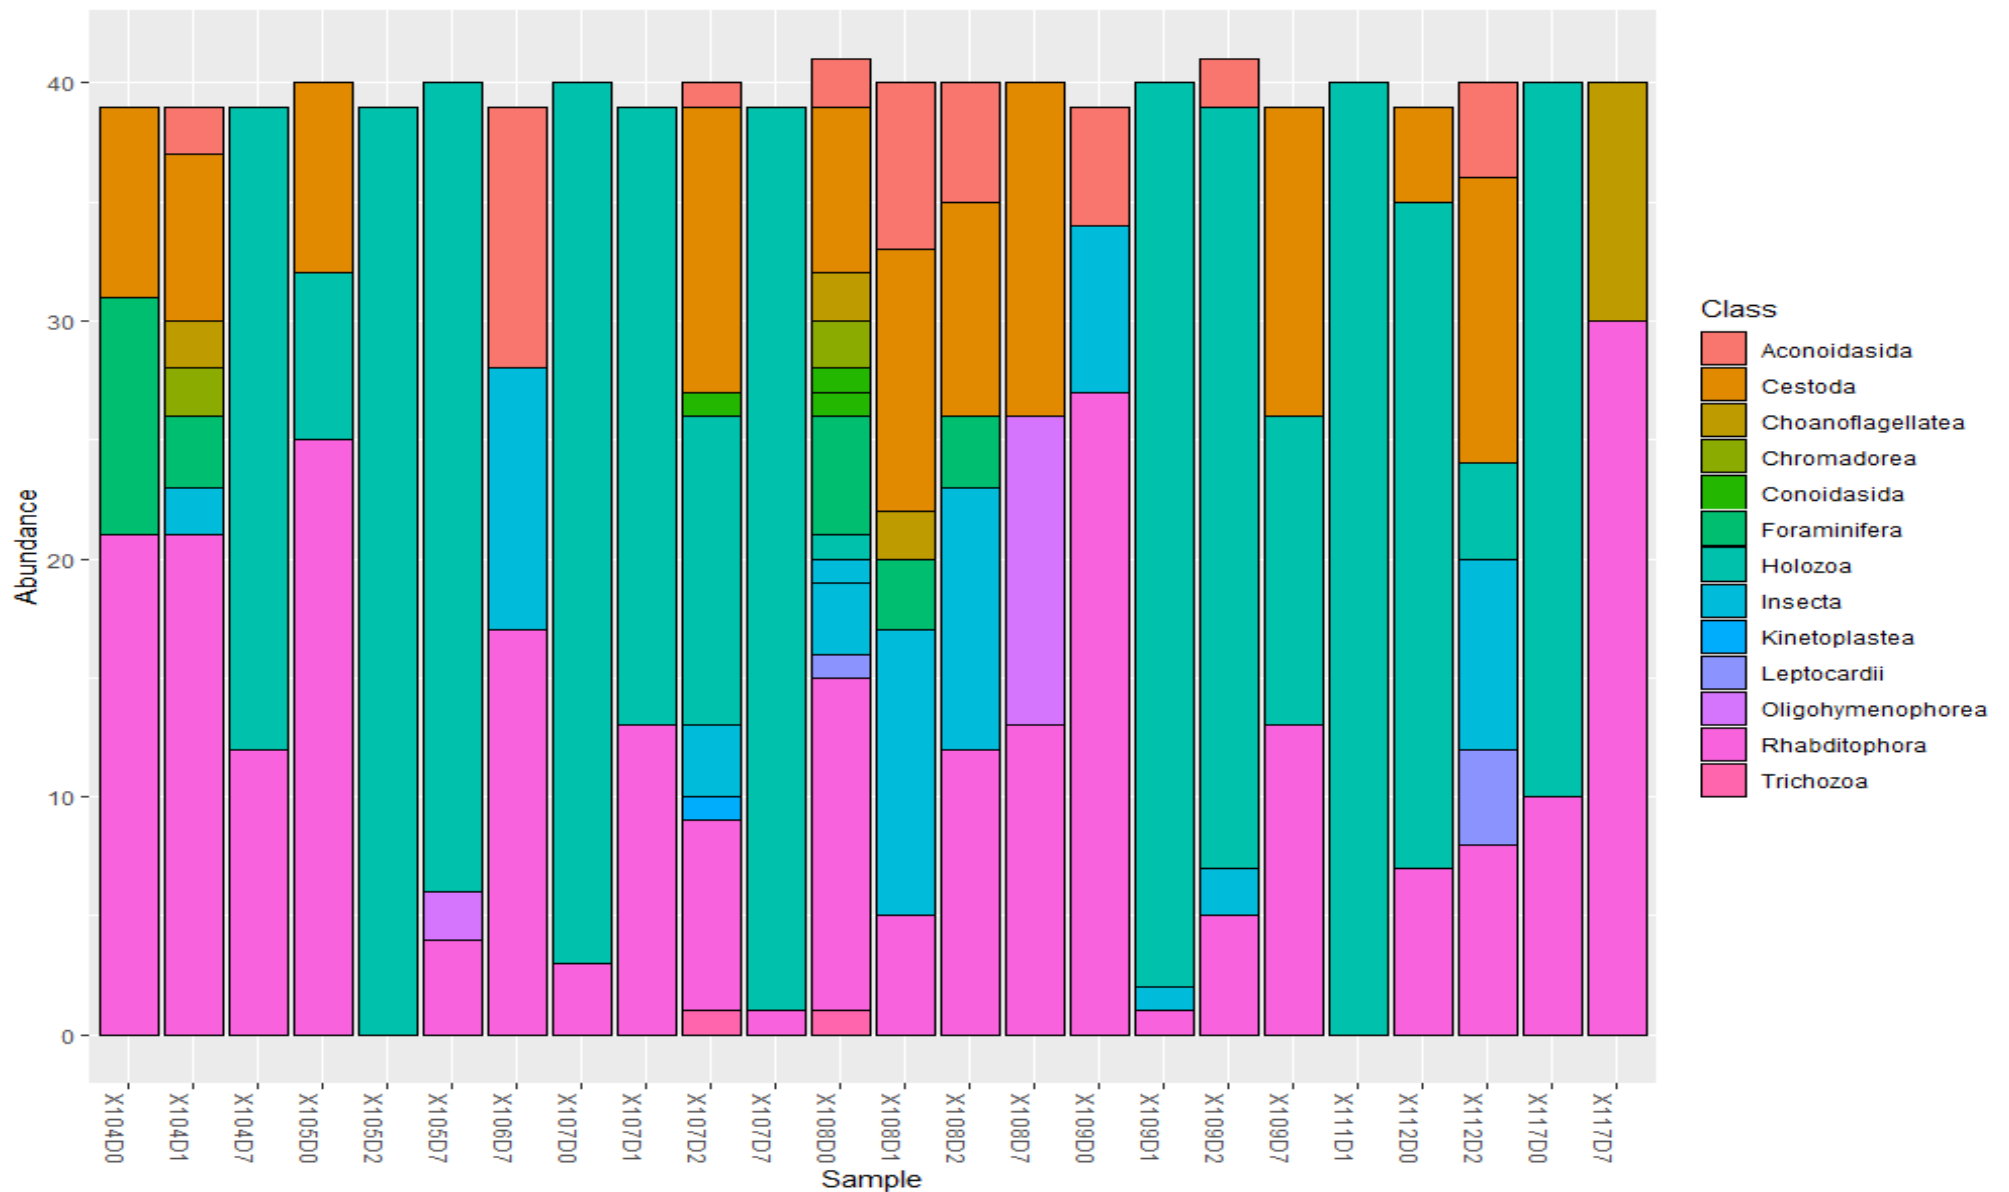

**Figure iii. Abundance of Parasitic Classes in the various samples.** The commonest classes were Rhabditophora and Holozoa, but their abundance patterns did not increase or decrease with antibiotic usage.

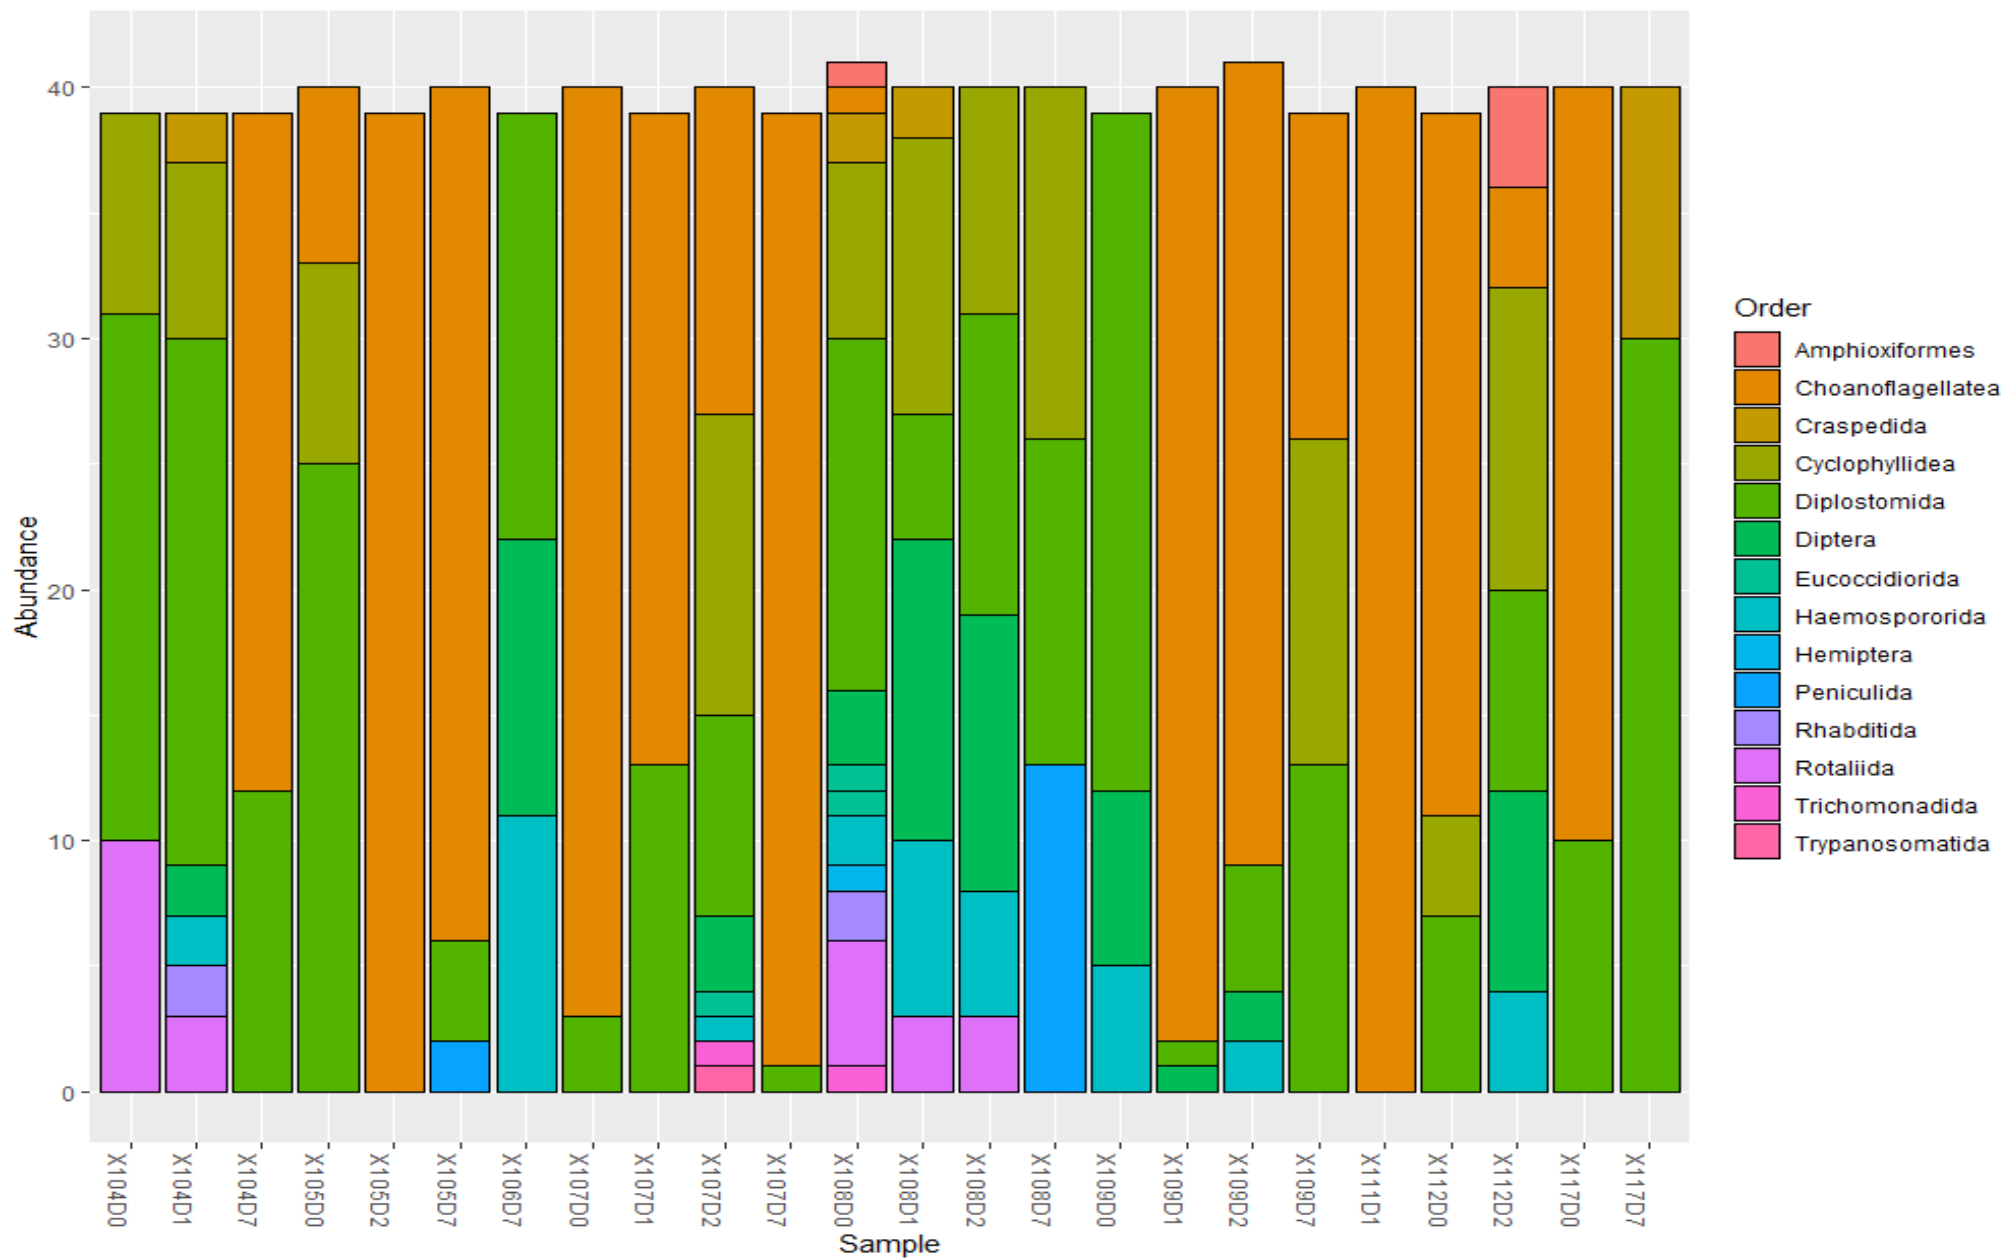

**Figure iv. Abundance of parasitic orders in the samples.** Common parasitic orders included Diplostomida and Amphioxiformes; however, the changes did not consistently follow the use of antibiotics.

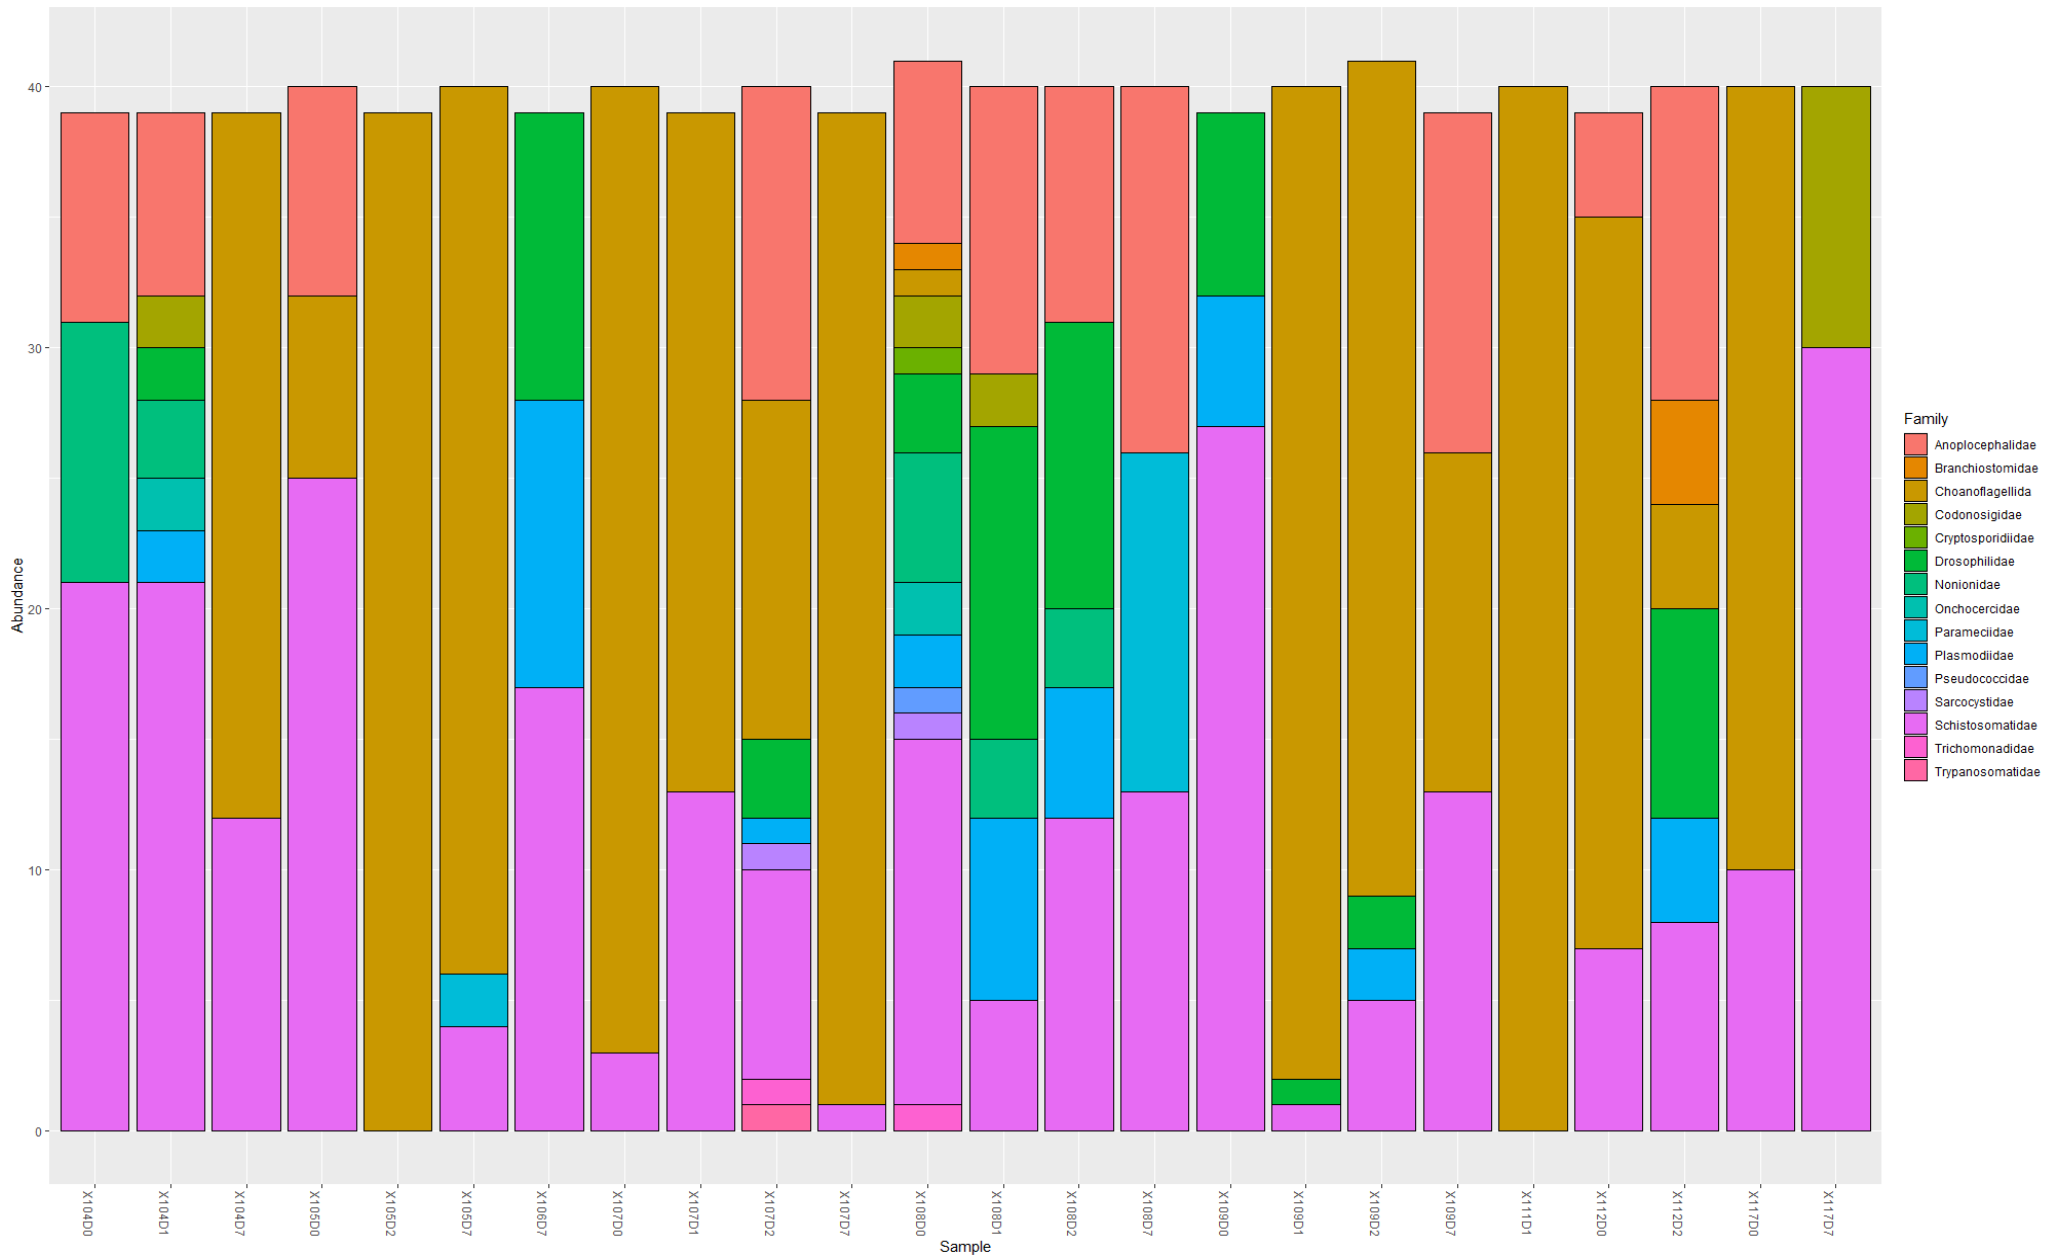

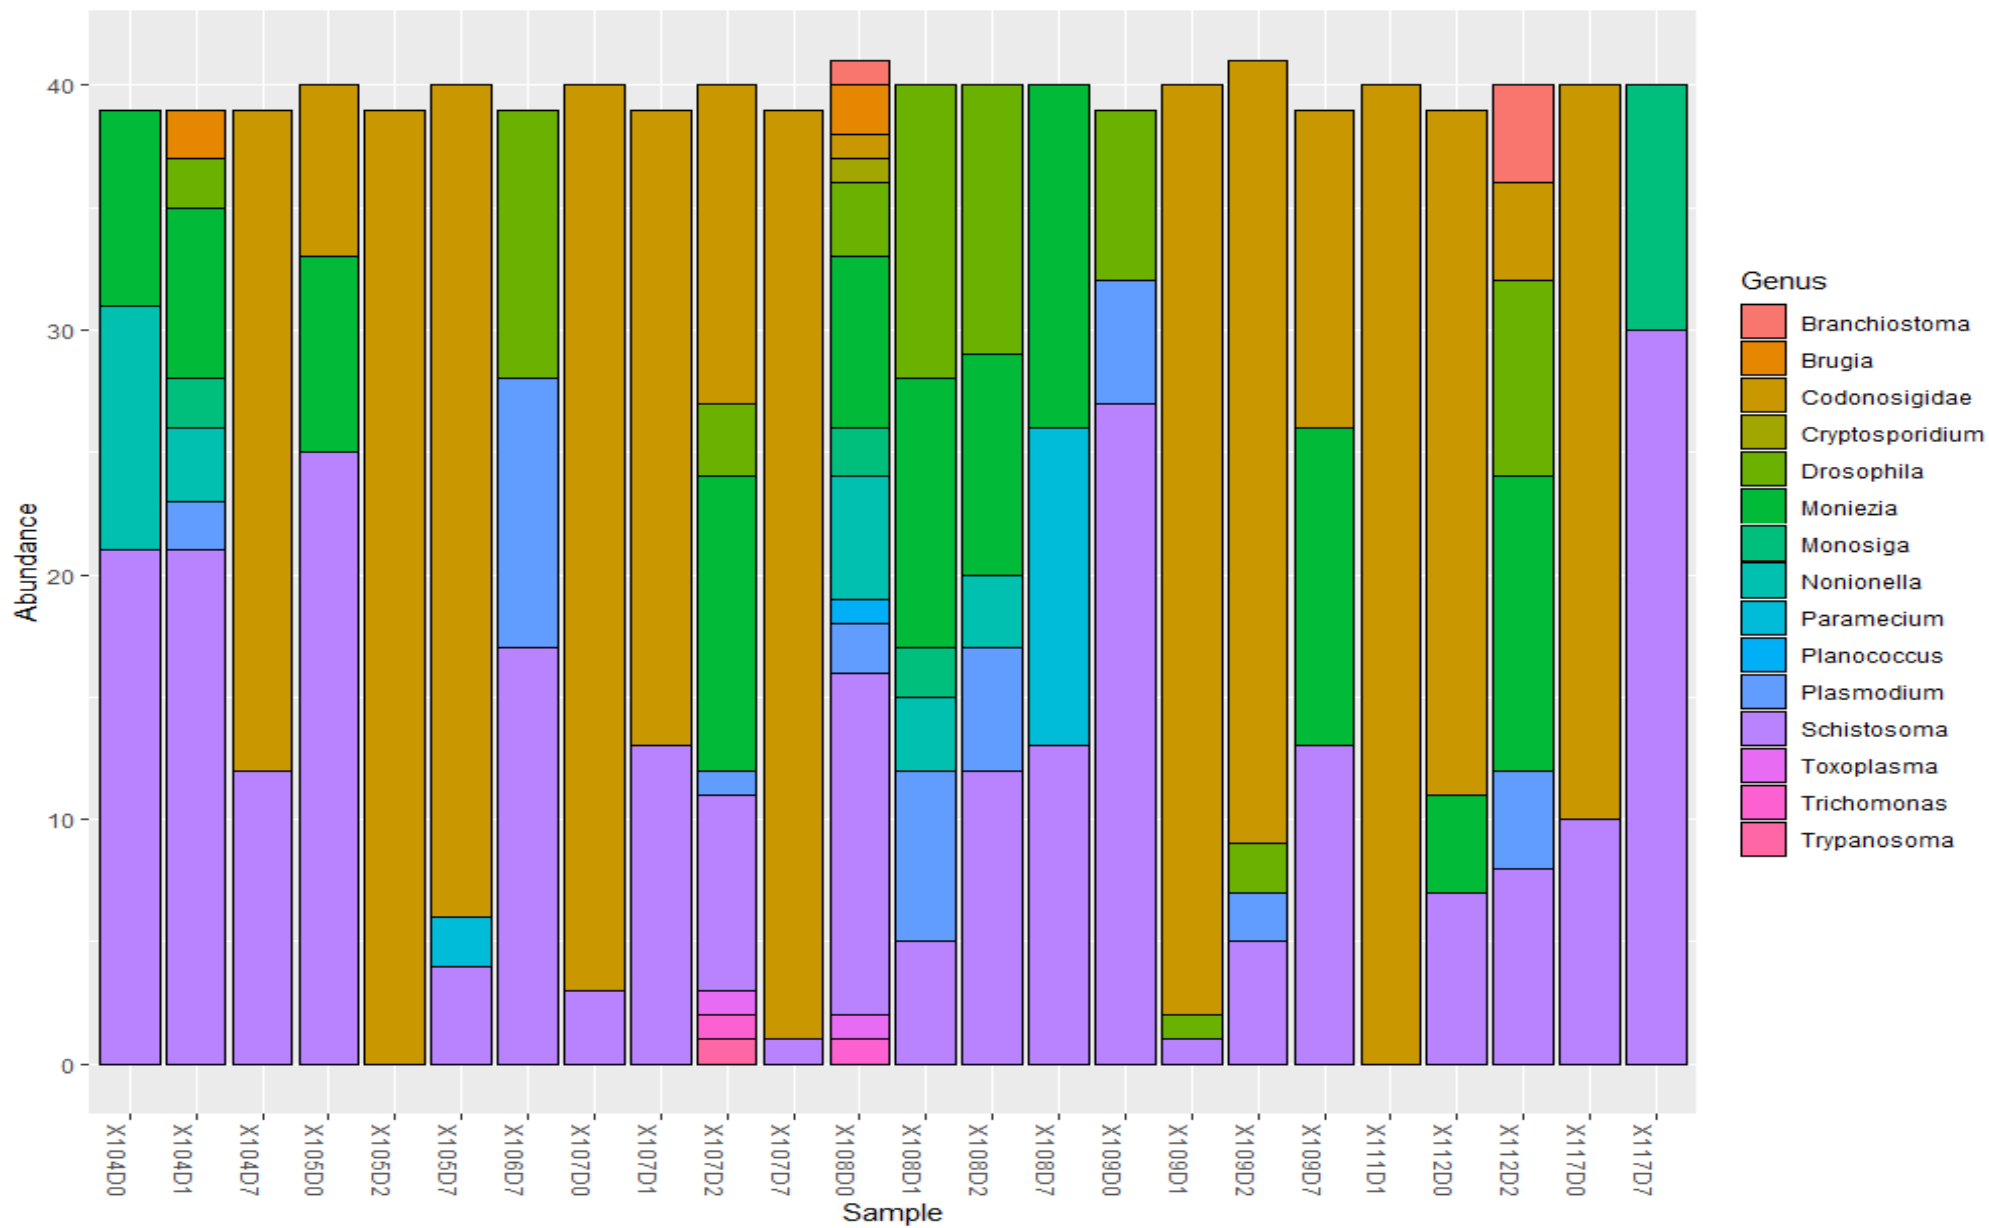

**Figure vi. Abundance of parasitic genera in the samples.** Common genera included *Schistosoma*, *Codonosigidae*, and *Moniezia*. The variations in the abundance were not reflective of the antibiotic usage over time.
