# Supplementary material for: An Oxford Nanopore-based Characterisation of Sputum Microbiota Dysbiosis in Patients with Tuberculosis: from baseline to 7 days after Antibiotic Treatment
Source: bioRxiv or medRxiv preprint supplement (doi:10.1101/2021.06.24.21259332), 2021-06-29
Supplement: Supplementary file [file media-8.pdf]

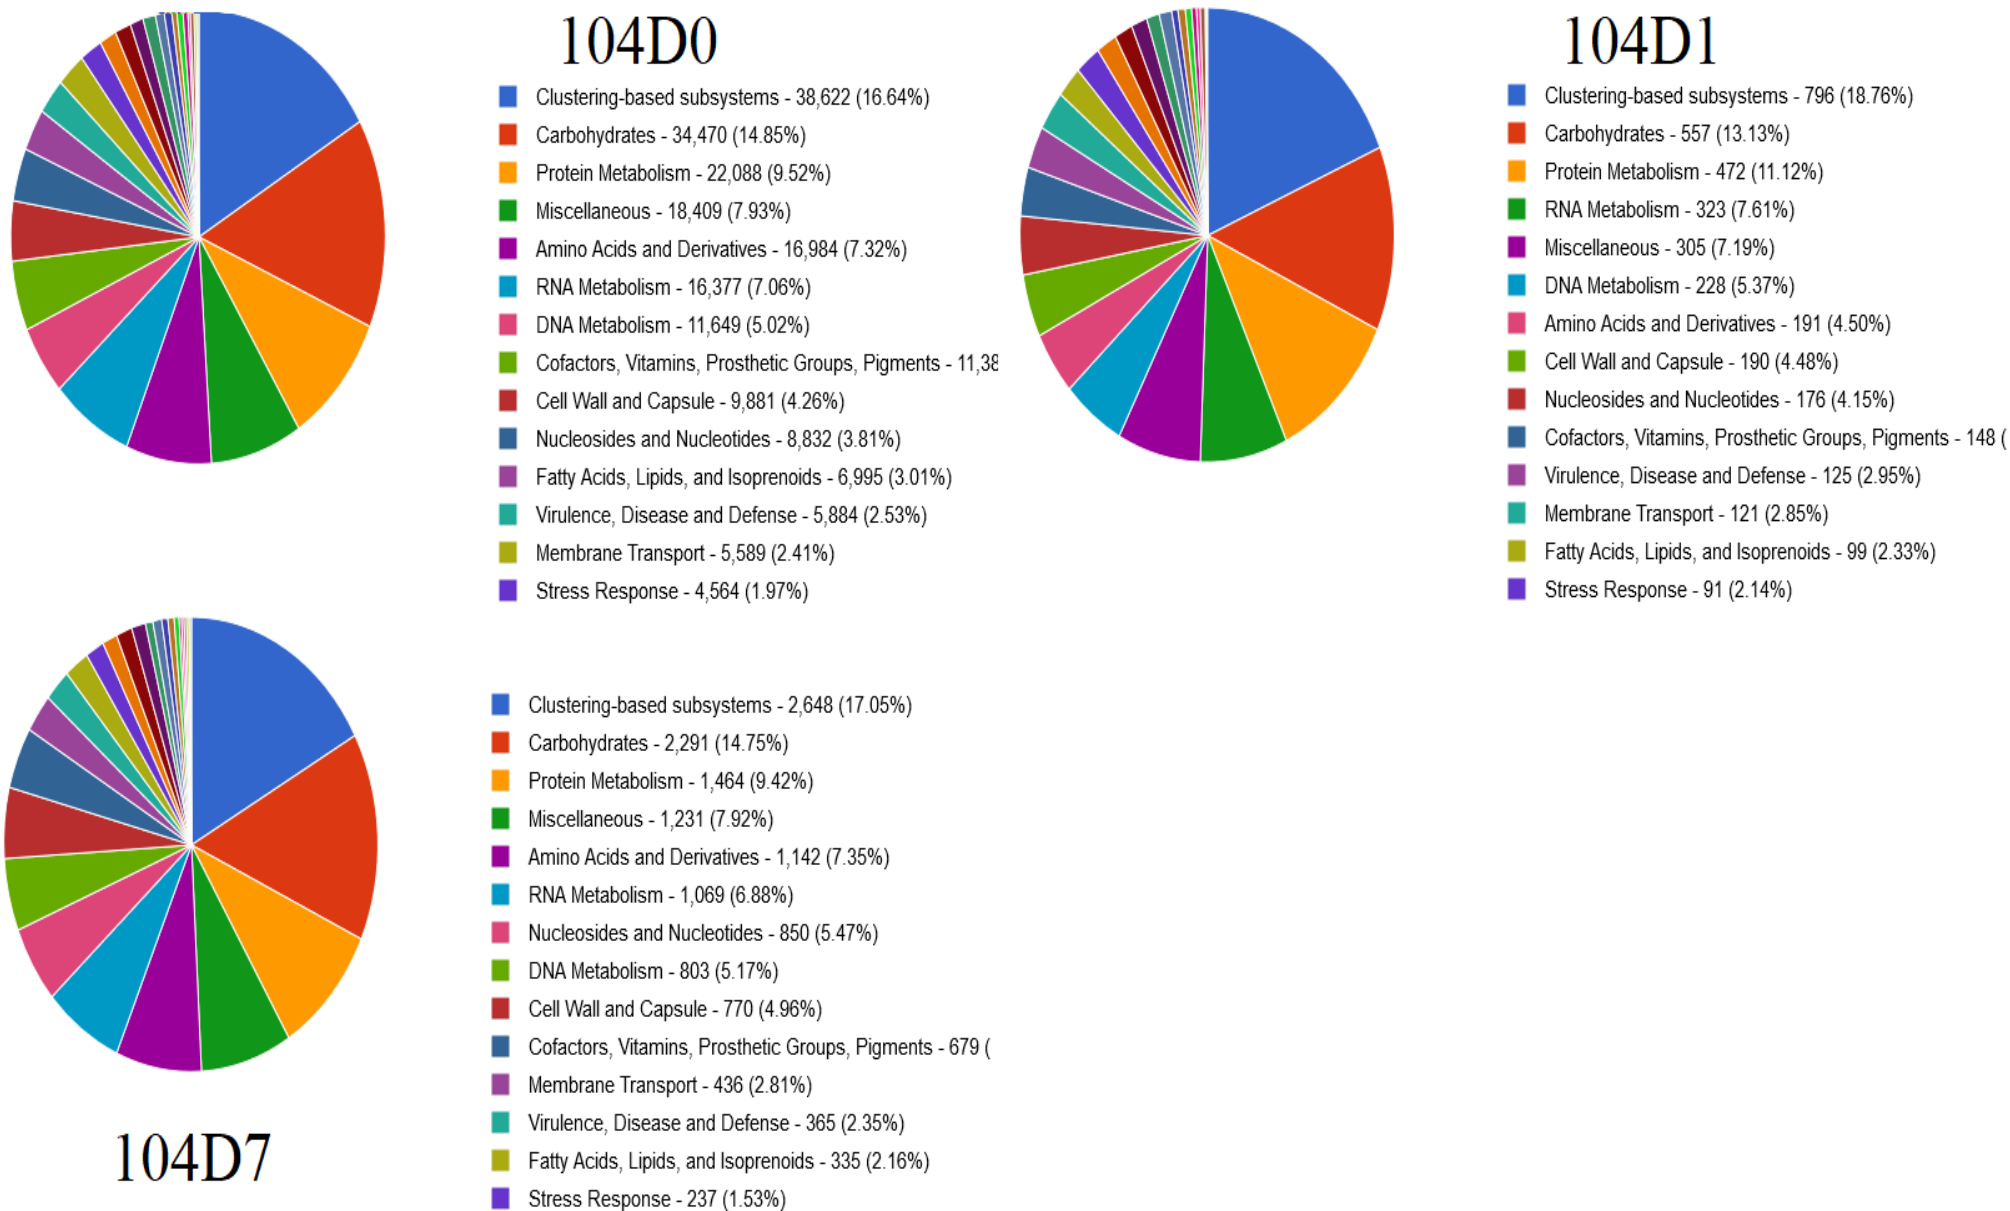

**Figure i. The Subsystems structure of the microbiome of patient 104 from baseline to day 7.** Higher increases could be seen in the percentage of stress response, nucleosides & nucleotides, protein metabolism, cofactors, vitamins, prosthetic groups, & pigments, and clustering-based subsystems on day 1 than the baseline. Reductions were seen in carbohydrates, amino acid & derivatives, fatty acids, lipids, & isoprenoids. Day 7 presented fewer differences from baseline samples: increased clustering-based subsystems, nucleoside & nucleotides; reduced RNA metabolism. Changes in metabolism could be seen after the introduction to antibiotics, reflecting the change in the microbiota.

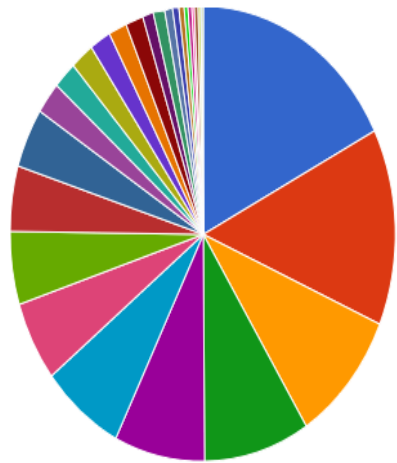

105D0

- Clustering-based subsystems - 4,885 (17.57%)
- Carbohydrates - 3,878 (13.95%)
- Protein Metabolism - 2,624 (9.44%)
- Miscellaneous - 2,470 (8.88%)
- RNA Metabolism - 2,096 (7.54%)
- Amino Acids and Derivatives - 1,916 (6.89%)
- DNA Metabolism - 1,573 (5.66%)
- Cell Wall and Capsule - 1,450 (5.22%)
- Cofactors, Vitamins, Prosthetic Groups, Pigments - 1,297
- Nucleosides and Nucleotides - 1,163 (4.18%)
- Membrane Transport - 645 (2.32%)
- Fatty Acids, Lipids, and Isoprenoids - 538 (1.94%)
- Virulence, Disease and Defense - 537 (1.93%)
- Stress Response - 495 (1.78%)

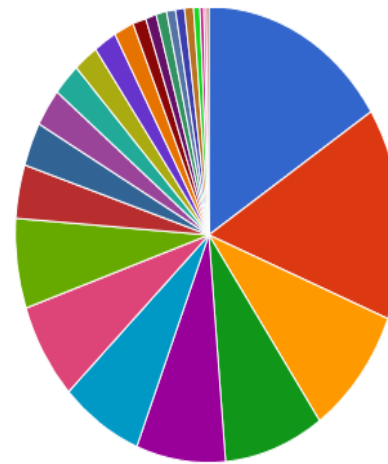

105D2

- Carbohydrates - 88 (15.94%)
- Clustering-based subsystems - 83 (15.04%)
- Protein Metabolism - 51 (9.24%)
- Amino Acids and Derivatives - 46 (8.33%)
- Cofactors, Vitamins, Prosthetic Groups, Pigments - 41 (7.68%)
- Virulence, Disease and Defense - 38 (6.88%)
- RNA Metabolism - 38 (6.88%)
- Miscellaneous - 35 (6.34%)
- Cell Wall and Capsule - 21 (3.80%)
- Membrane Transport - 17 (3.08%)
- Nucleosides and Nucleotides - 15 (2.72%)
- Fatty Acids, Lipids, and Isoprenoids - 13 (2.36%)
- Phages, Prophages, Transposable elements, Plasmids - 12 (2.24%)
- Stress Response - 11 (1.99%)

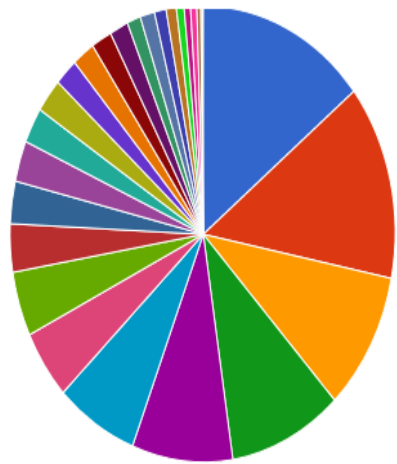

105D7

- Carbohydrates - 271 (14.34%)
- Clustering-based subsystems - 262 (13.86%)
- Cofactors, Vitamins, Prosthetic Groups, Pigments - 186 (9.73%)
- Miscellaneous - 179 (9.47%)
- Amino Acids and Derivatives - 158 (8.36%)
- Protein Metabolism - 131 (6.93%)
- RNA Metabolism - 93 (4.92%)
- DNA Metabolism - 87 (4.60%)
- Membrane Transport - 63 (3.33%)
- Cell Wall and Capsule - 58 (3.07%)
- Fatty Acids, Lipids, and Isoprenoids - 54 (2.86%)
- Nucleosides and Nucleotides - 48 (2.54%)
- Virulence, Disease and Defense - 46 (2.43%)
- Phages, Prophages, Transposable elements, Plasmids - 45 (2.37%)

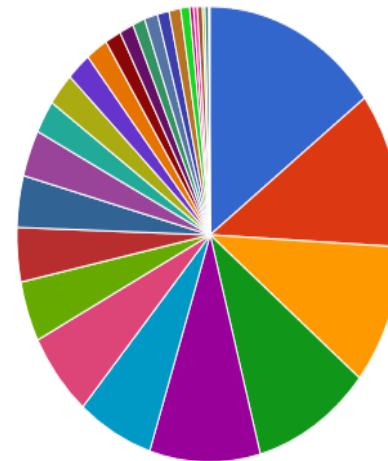

106D7

- Clustering-based subsystems - 725 (14.86%)
- Carbohydrates - 538 (11.02%)
- Protein Metabolism - 488 (10.00%)
- Miscellaneous - 482 (9.88%)
- Amino Acids and Derivatives - 450 (9.22%)
- RNA Metabolism - 311 (6.37%)
- Cofactors, Vitamins, Prosthetic Groups, Pigments - 294 (6.02%)
- DNA Metabolism - 206 (4.22%)
- Cell Wall and Capsule - 191 (3.91%)
- Nucleosides and Nucleotides - 177 (3.63%)
- Fatty Acids, Lipids, and Isoprenoids - 161 (3.30%)
- Respiration - 116 (2.38%)
- Membrane Transport - 111 (2.27%)
- Stress Response - 99 (2.03%)

**Figure ii. The Subsystems structure of the microbiome of patients 105 & 106 from baseline to day 7.** Carbohydrates', membrane transport, fatty acids, lipids, & isoprenoids, virulence, disease & defense increased in 2<sup>nd</sup> & 7<sup>th</sup> day. Protein, RNA metabolism, cell wall & capsule dropped in days 2 & 7, but amino acid derivatives, nucleosides & nucleotides dropped on the same days whilst DNA metabolism dropped on day 7. Hence, antibiotics usage restructured the microbiota, affecting the metabolism state of the sputum microbiota.

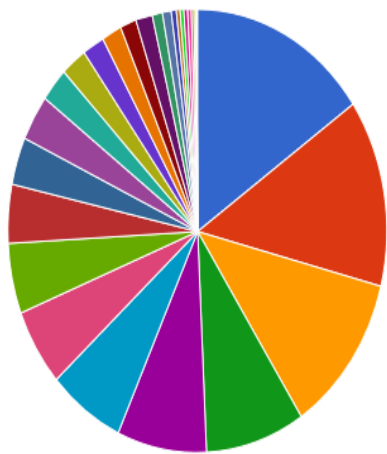

107D0

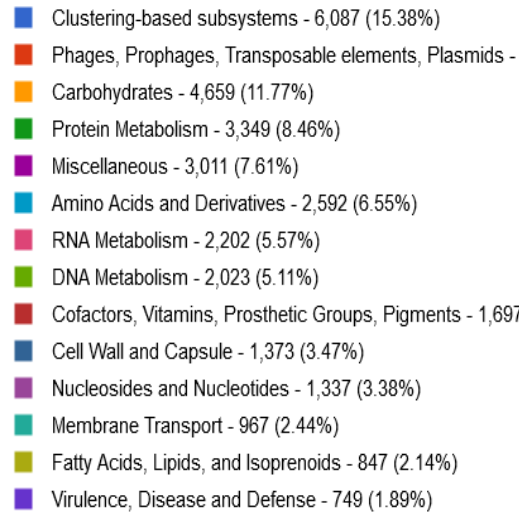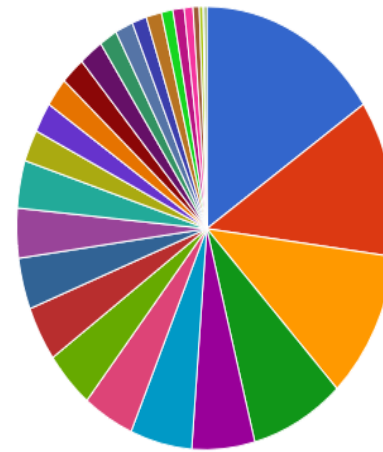

107D1

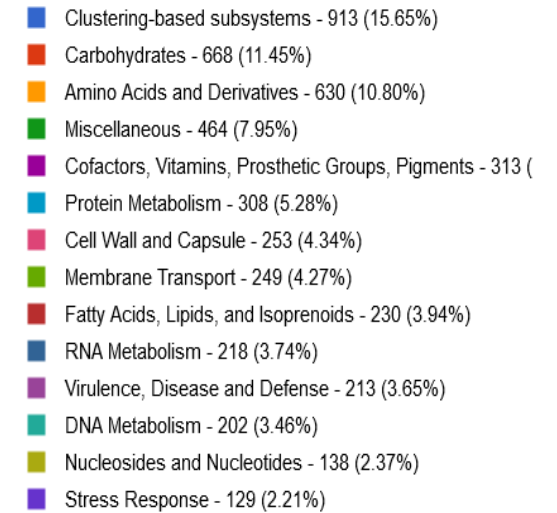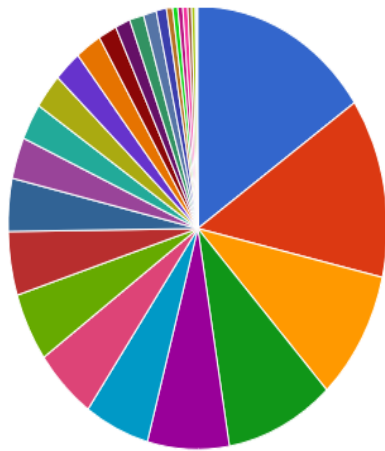

107D2

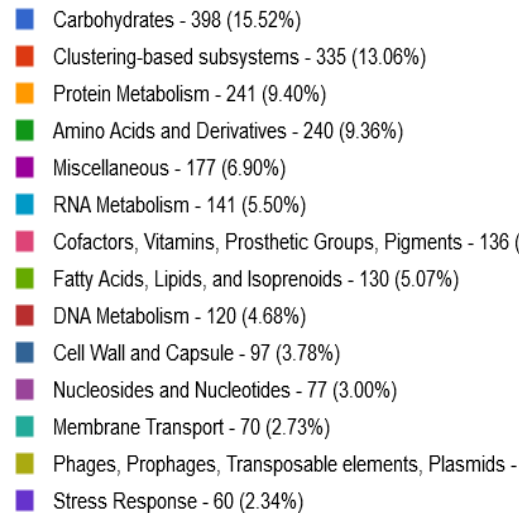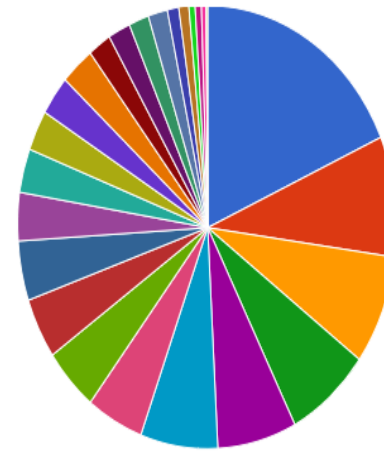

107D7

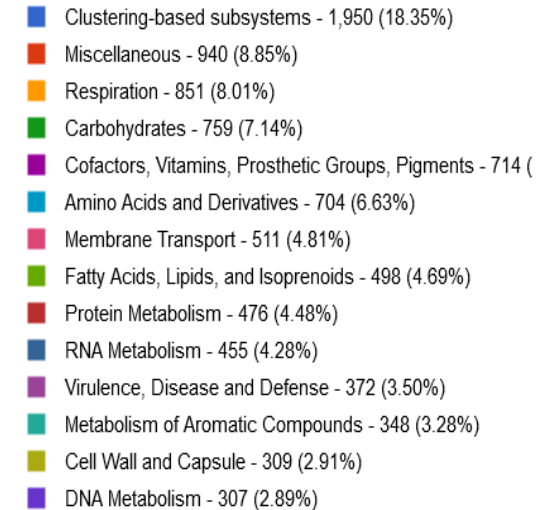

**Figure iii. The Subsystems structure of the microbiome of patient 107 from baseline to day 7.** The proportion of carbohydrates only increased on day 2 but dropped on day 7. The proportion of protein metabolism reduced on day 1, increased on day 2, & dropped again on day 7. Amino acid & derivatives increased after baseline through days 1-7. The proportion of RNA metabolism decreased on days 1 & 7. DNA metabolism reduced after baseline. Cell wall & capsules increased on days 1 & 2 but dropped on day 7. Nucleoside & nucleotide also reduced after days 1 & 2 whilst membrane transport increased after day 1 & 7. Fatty acid, lipids, & isoprenoids increased from day 1 to day 7.

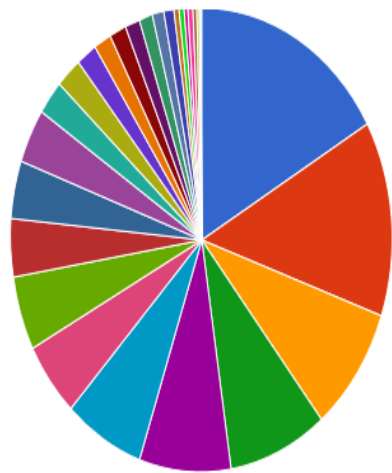

108D0

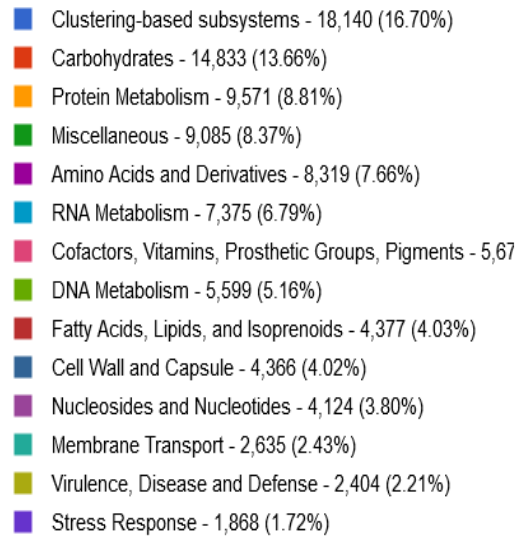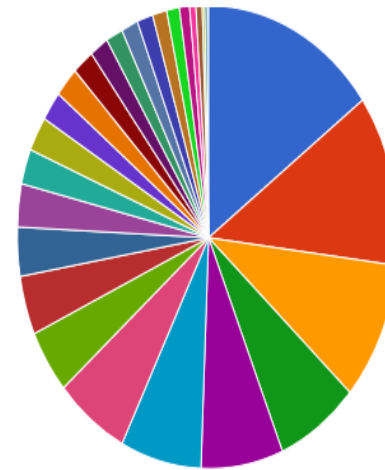

108D1

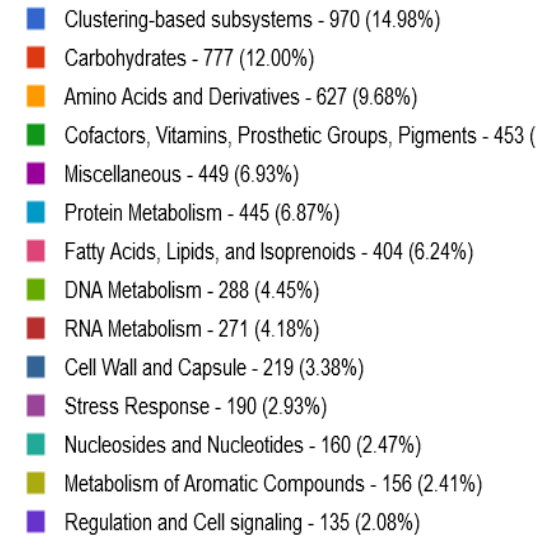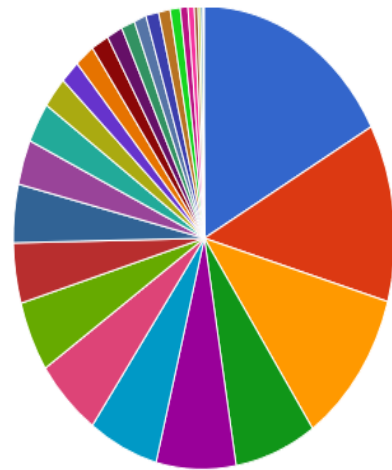

108D2

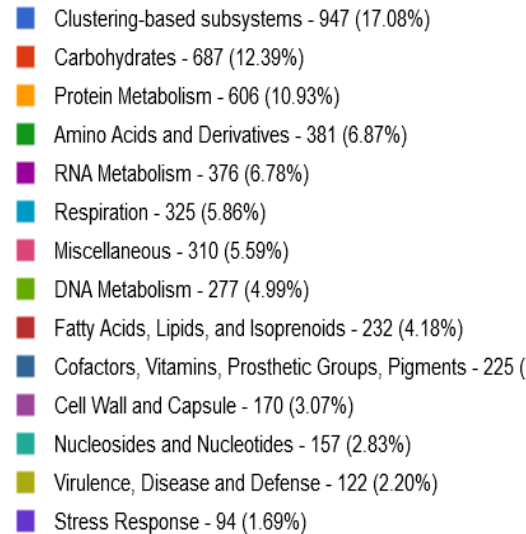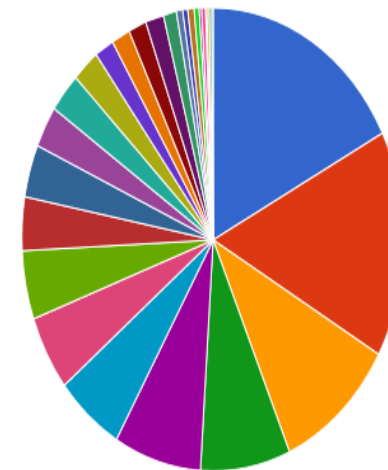

108D7

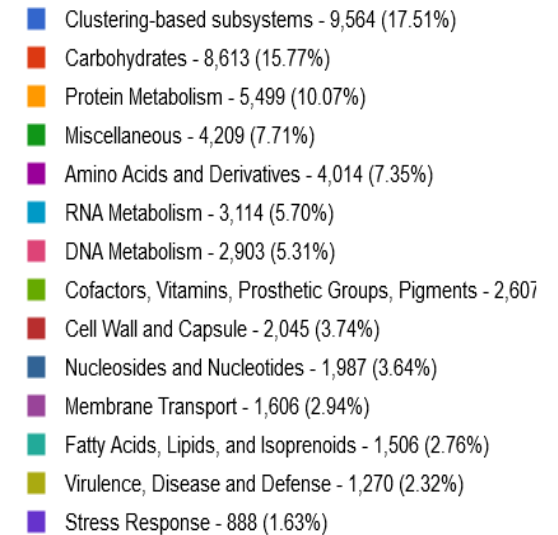

**Figure iv. The Subsystems structure of the microbiome of patient 108 from baseline to day 7.** Proportion of carbohydrates reduced on days 1 & 2 but increased on day 7. Protein metabolism increased on days 2 & 7 but reduced on day 1. Amino acid & derivates only increased on day 1 but reduced on days 2 & 7. RNA metabolism reduced on days 1 & 7; DNA metabolism reduced on days 1 & 2; Fatty acids, lipids, & isoprenoids increased on day 1 & reduced drastically on day 7. Cell wall & capsule subsystems, and nucleosides & nucleotides reduced after baseline, showing the effect of antibiotics on the functional microbiota.

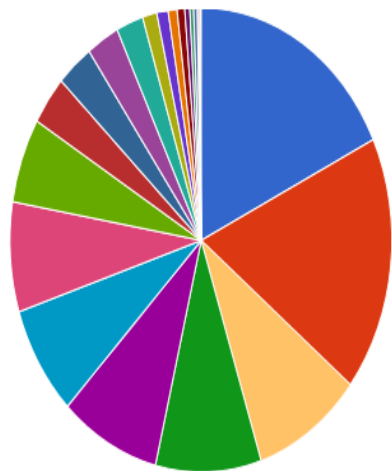

109D0

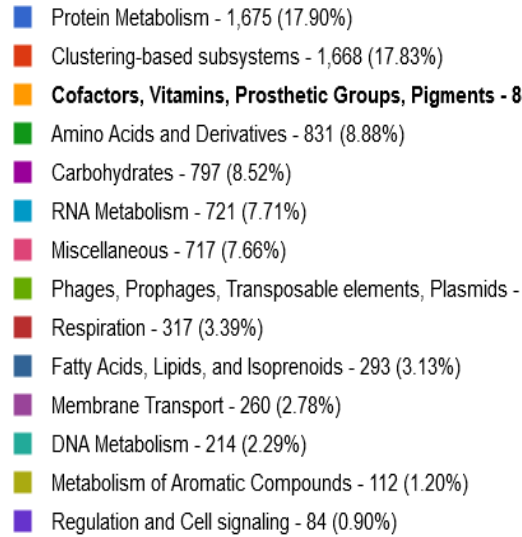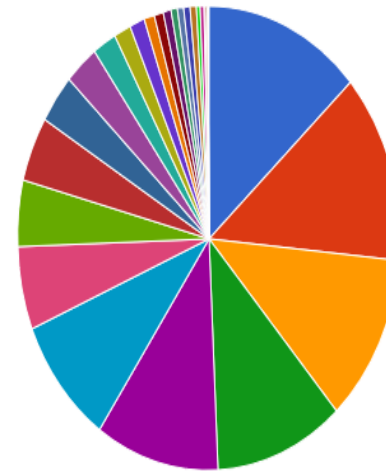

109D1

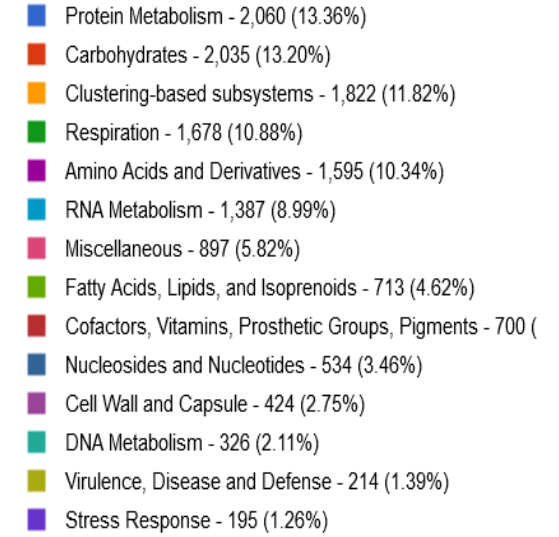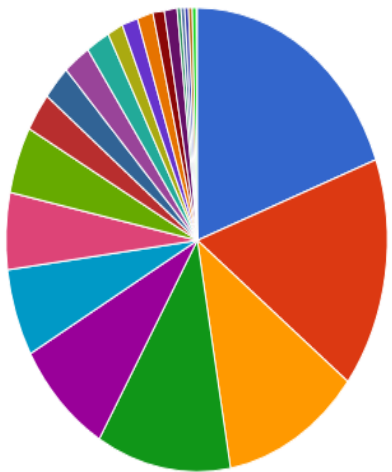

109D2

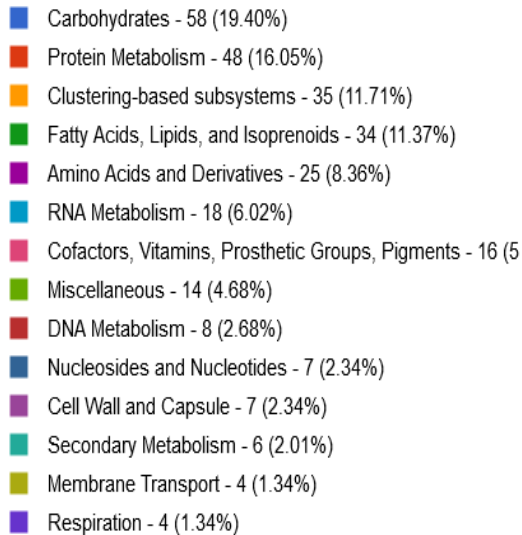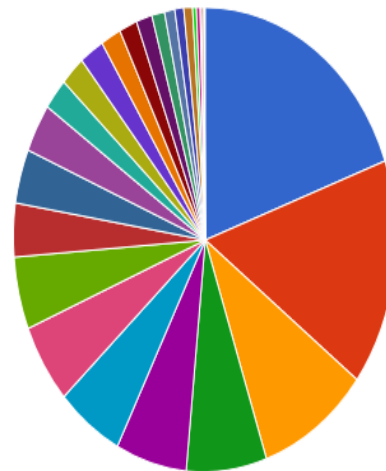

109D7

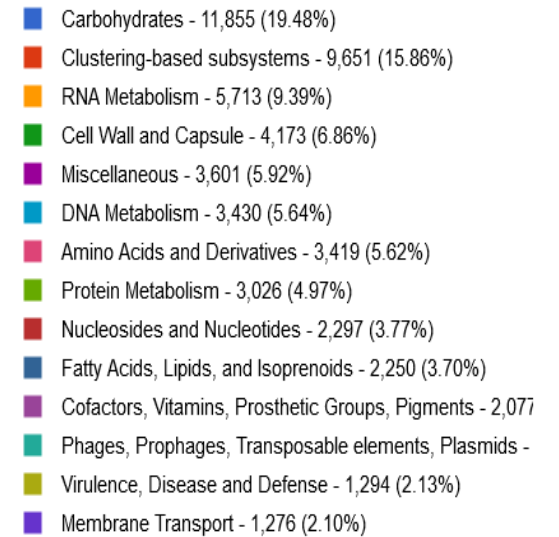

**Figure v. The Subsystems structure of the microbiome of patient 109 from baseline to day 7.** Protein metabolism reduced from baseline to day 7, amino acid derivatives reduced on days 2 & 7 (but increased on day 1), carbohydrates increased after baseline until day 7, RNA metabolism increased on days 1 & 7 (but reduced on day 2), fatty acids, lipids, & isoprenoids increased after baseline until day 7, membrane transport increased on days 2 & 7, DNA metabolism increased on days 2 & 7 (but dropped slightly on day 1), also showing how the use of antibiotics affected the functional microbiota through dysbiosis.

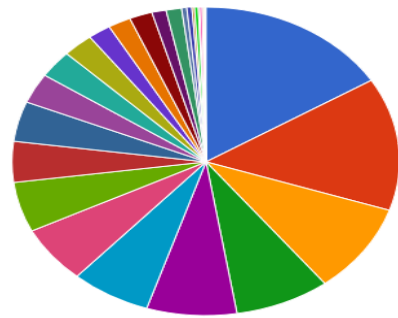

111D1

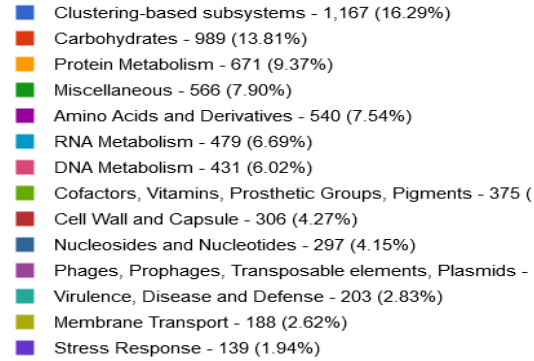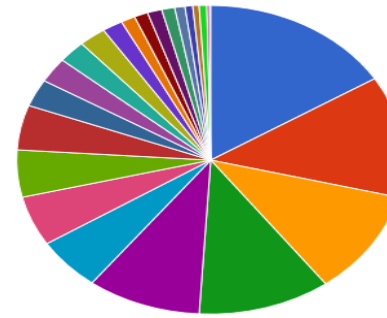

111D2

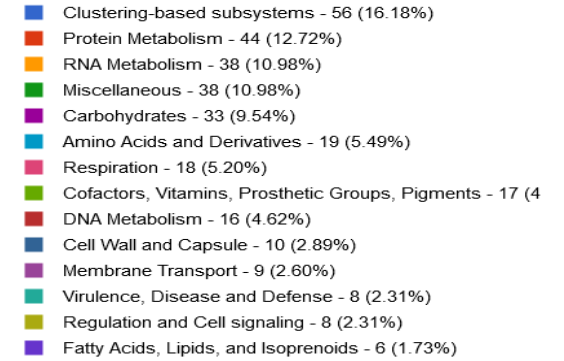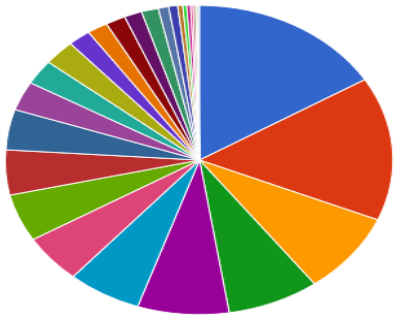

111D7

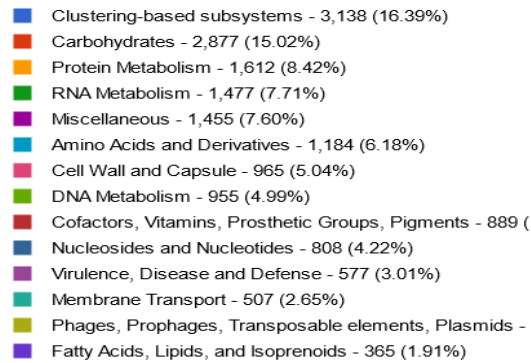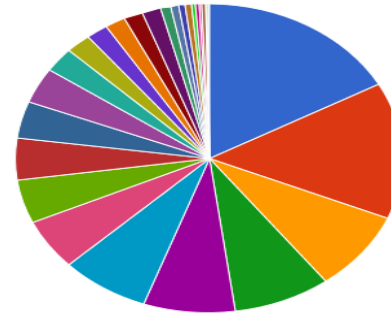

112D0

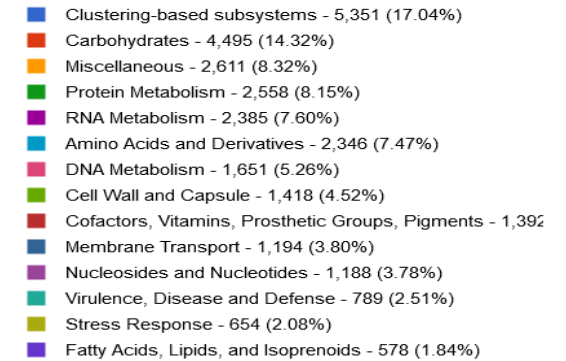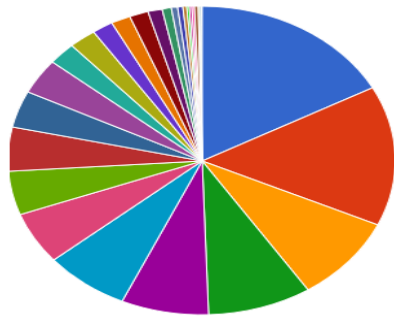

117D0

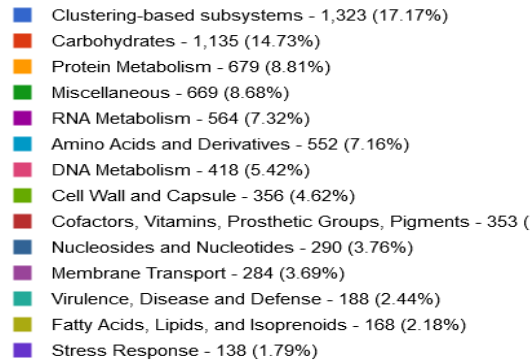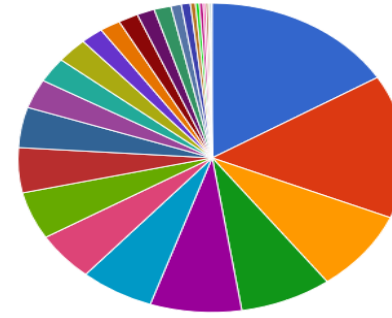

117D7

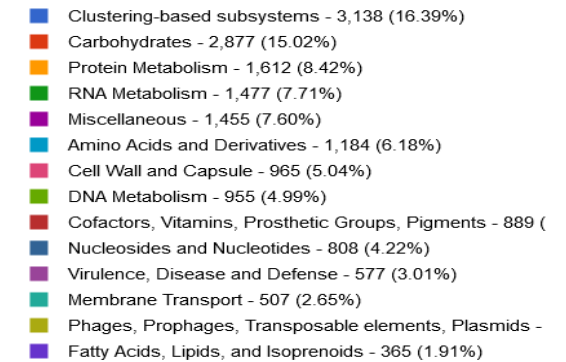

**Figure vi. The Subsystems structure of the microbiome of patients 111, 112, & 117 from baseline to day 7.** Proportion of carbohydrates, DNA metabolism, and cell wall & capsule decreased from day 1 to day 2 whilst RNA & Protein metabolism, and amino acid derivatives, increased within the two days in patient 111. Proportion of carbohydrates, RNA metabolism, cell wall & capsule, nucleoside & nucleotides increased between baseline and day 7, DNA & protein metabolism, amino acids & derivatives, membrane transport, and fatty acids, lipids, & isoprenoids reduced between baseline & day 7 in patient 117.
